# Supplementary material for: l-Isoleucine derived bifunctional phosphine catalyses asymmetric [3 + 2]-annulation of allenyl-esters and -ketones with ketimines
Source: Royal Society of Chemistry journal article supplement (doi:10.1039/c6ra12387b), 2016-01-01

## Supporting Information

# L-Isoleucine Derived Bifunctional Phosphine Catalyses Asymmetric [3+2]-Annulation of Allenyl-Esters and -Ketones with Ketimines

Muthukumar G. Sankar,<sup>a</sup> Miguel Garcia-Castro,<sup>a</sup> Christopher Golz,<sup>b</sup> Carsten Strohmann<sup>b</sup> and Kamal Kumar<sup>\*a</sup>

<sup>a</sup>Max-Planck-Institut für Molekulare Physiologie, Abteilung Chemische Biologie, Otto-Hahn-Straße 11, 44227 Dortmund, Germany.

<sup>b</sup>Fakultät Chemie und Chemische Biologie, Technische Universität Dortmund, Otto-Hahn-Straße 6, 44221 Dortmund, Germany.

## Content

|                                                                                                  |           |
|--------------------------------------------------------------------------------------------------|-----------|
| <b>I. General Information</b> .....                                                              | <b>2</b>  |
| <b>II. Preparation of isatin-imines 1</b> .....                                                  | <b>3</b>  |
| <b>III. Dipolar [3+2]-annulation reaction of allenolate zwitterions with isatin-imines</b> ..... | <b>3</b>  |
| <b>IV. Elaboration of the [3+2]-adducts</b> .....                                                | <b>27</b> |
| <b>VI. References</b> .....                                                                      | <b>31</b> |
| <b>VI. NMR Spectra</b> .....                                                                     | <b>32</b> |

## I. General Information

All the chemicals were purchased from Aldrich, Acros, or Alfa and were used without further purification. Reactions were carried out in standard glassware or a Radleys Carousel 12 parallel reactor. Thin layer chromatography (TLC) was performed on *Merck silica gel* <sup>60</sup>*F*<sub>254</sub> aluminum sheet. Column chromatography (CC) purifications were carried out using silica gel (Acros Organics, particle size 35-70 μm) was used. Solvents used for CC are commercially available. <sup>1</sup>H and <sup>13</sup>C-NMR spectroscopic data were recorded on a *Varian Mercury VX 400* or *Varian 500-inova500* spectrometer at RT. <sup>1</sup>H and <sup>13</sup>C-NMR spectra were calibrated to the solvent signals of CDCl<sub>3</sub> (= 7.26 and 77.00 ppm); multiplicities are indicated brs (broadened singlet), s (singlet), d (doublet), t (triplet), q (quartet), m (multiplet), dd (doublets of a doublet); coupling constants (*J*) are given in Hertz (Hz). LC/MS analysis were done using an Agilent 6150 single quadrupole (SQ) mass spectrometer coupled to an Agilent 1290 Infinity LC System. High resolution mass spectra were recorded on a *LTQ Orbitrap* mass spectrometer coupled to an *Acceka HPLC-System* (HPLC column: *Hypersyl GOLD*, 50 mm x 1 mm, particle size 1.9 μm, ionization method: electron spray ionization). Optical rotations were measured in a *Schmidt + Haensch Polartronic HH8* polarimeter. The enantiomeric excesses were determined by Agilent-1100 series HPLC system using a chiral stationary phase column (column: CHIRALPAK IC, CHIRALPAK IA, eluent: (DCM/EtOH = 100/2), iso-hexane). Chemical yields refer to pure isolated substances.

All reactions were carried out under argon atmosphere except noted. The allene-esters and benzoylallene were prepared according to the literature procedure and stored at 4 °C prior to use.<sup>1</sup> The acetylallene was prepared from acetyl acetone by treating with dibromotriphenylphosphorane followed by triethylamine.<sup>2</sup> All the bifunctional *N*-acyl aminophosphine catalysts (**V-XV**) were prepared according to the literature procedures.<sup>3</sup>

## II. Preparation of Isatinimines **1**

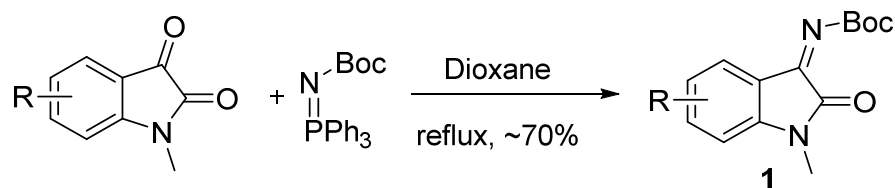

The required isatin-imine was prepared according to the reported in the literature.<sup>4</sup> In an oven-dried Schlenk flask under argon atmosphere, isatin (10 mmol) and *N*-Boc iminophosphorane (11 mmol) were placed. To this reaction mixture anhydrous 1,4-dioxane (10 mL) was added and was heated under reflux until complete disappearance of the starting materials. Then the reaction was cooled to room temperature. After an evaporation of the volatile organic solvents, the crude residue was purified by flash chromatography (silica gel, hexane/ethyl acetate) and afforded the required isatin-imine **1** in good yields (60-75%).

## III. Dipolar [3+2]-annulation reaction of allenolate zwitterions with isatin-imines

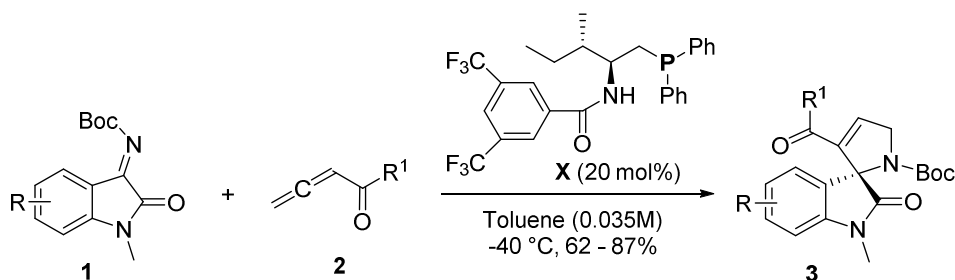

General procedure for the [3+2]-dipolar annulation reaction: To a stirred solution of isatin-imine **1** (1.0 equiv.) and allene **2x** (1.2 equiv.) in degassed toluene (0.035 M) was added the bifunctional aminophosphine catalyst **XIV** (20 mol%) at -40 °C and continued to stir at -40 °C overnight (12 h). The reaction was monitored by TLC using Pet.ether/ethyl acetate (1:1) as eluent. After completion, the reaction mixture was concentrated to give the crude compound. The crude product thus obtained was purified by flash column chromatography on silicagel using 35-60% Ethyl acetate in Petroleum ether as gradient eluent and afforded the spirooxindole **3**.

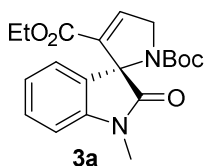

Chemical Formula: C<sub>20</sub>H<sub>24</sub>N<sub>2</sub>O<sub>5</sub>  
 Exact Mass: 372.16852  
 Molecular Weight: 372.42100

Yield: 84%; *e.e* = 97.1%;  $[\alpha]_D^{20} = -19.8^\circ$  (*c* 1.17, CH<sub>2</sub>Cl<sub>2</sub>); IR  $\nu_{\max}/\text{cm}^{-1}$  3058, 2978, 2934, 1788, 1721, 1703; <sup>1</sup>H NMR (5:1 rotamer ratio, asterisks denote minor rotamer peaks, 400 MHz, CDCl<sub>3</sub>)  $\delta$  7.30 (td, *J* = 7.6, 1.5 Hz, 1H), 7.13 (t, *J* = 2.2 Hz, 1H), 7.08\* (t, *J* = 2.2 Hz, 0.2H), 7.06 – 7.03 (m, 1H), 7.00 (td, *J* = 7.4, 0.9 Hz, 1H), 6.97\* (td, *J* = 7.4, 0.9 Hz, 0.2H), 6.83\* (d, *J* = 7.7 Hz, 0.3H), 6.79 (d, *J* = 7.7 Hz, 1H), 4.62 (dd, *J* = 18.3, 2.2 Hz, 1H), 4.56 (dd, *J* = 18.3, 2.2 Hz, 1H), 4.48\* (dd, *J* = 18.1, 2.1 Hz, 0.2H), 4.05 – 3.86 (m, 2H), 3.28\* (s, 0.5H), 3.23 (s, 3H), 1.36 (s, 1.5 H), 1.07 (s, 9H), 1.09 – 0.99 (m, 3H); <sup>13</sup>C NMR (asterisks denote minor rotamer peaks, 101 MHz, CDCl<sub>3</sub>)  $\delta$  174.24, 161.02, 152.56, 144.88\*, 144.81, 140.20\*, 140.06, 134.87\*, 134.78, 134.68\*, 130.28\*, 129.67, 129.44, 129.09\*, 128.67\*, 122.87, 122.76, 122.74\*, 122.59\*, 108.29\*, 108.02\*, 107.86, 98.42, 83.41\*, 80.95, 80.88\*, 72.61, 60.99, 60.93\*, 54.31\*, 54.02, 53.62\*, 28.54, 28.29\*, 28.01, 27.89, 26.87\*, 26.61, 14.01, 13.96\*; HRMS [ESI]: Calculated for C<sub>20</sub>H<sub>25</sub>N<sub>2</sub>O<sub>5</sub> [M+H<sup>+</sup>]: 373.17580, found: 373.17624; RT = 21.1 min. (Chiral HPLC, column : chiralpak IC, eluent: 50% of mixture of EtOH-DCM (1 : 50) in isohexane, Flow rate: 0.5 mL/min).

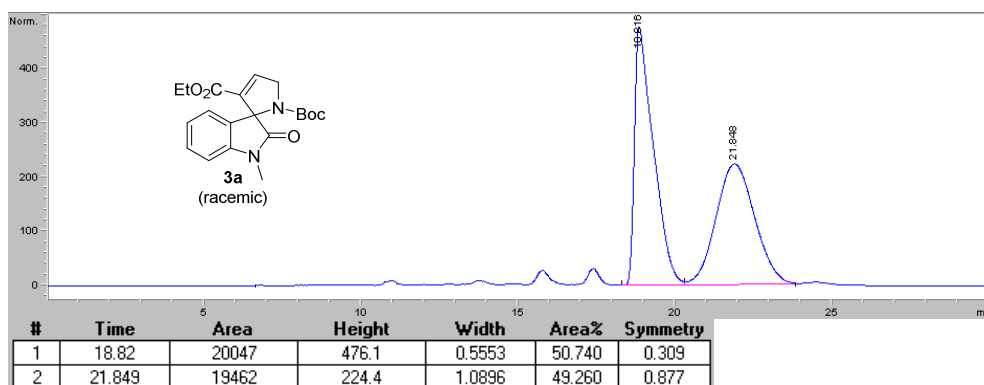

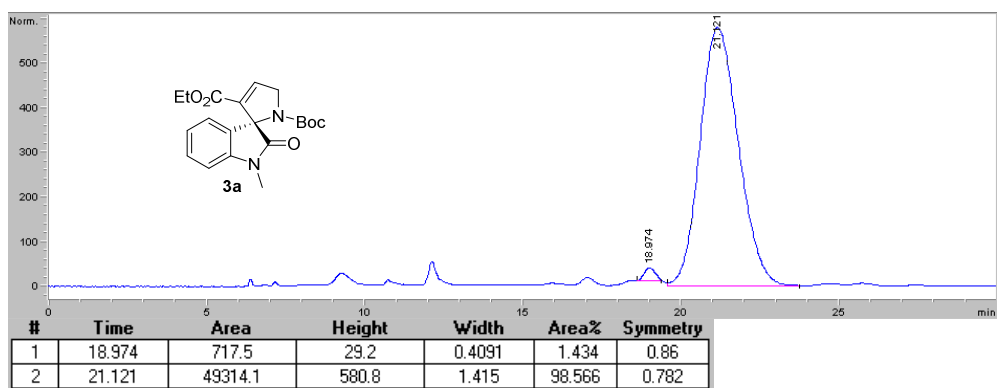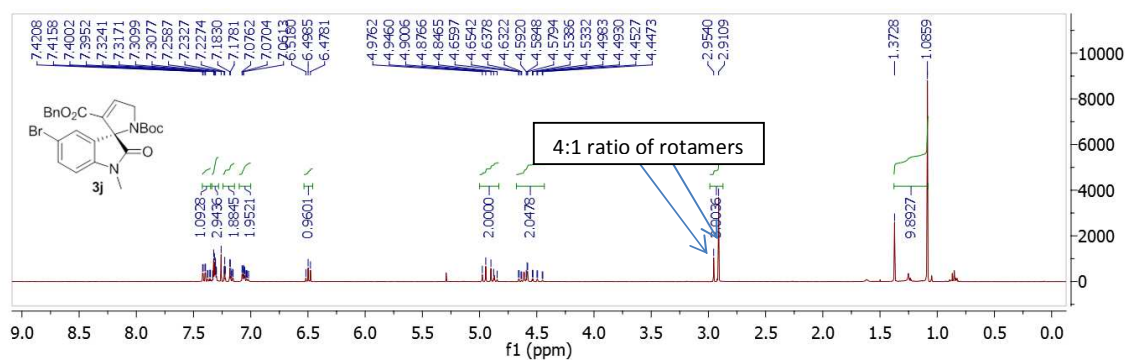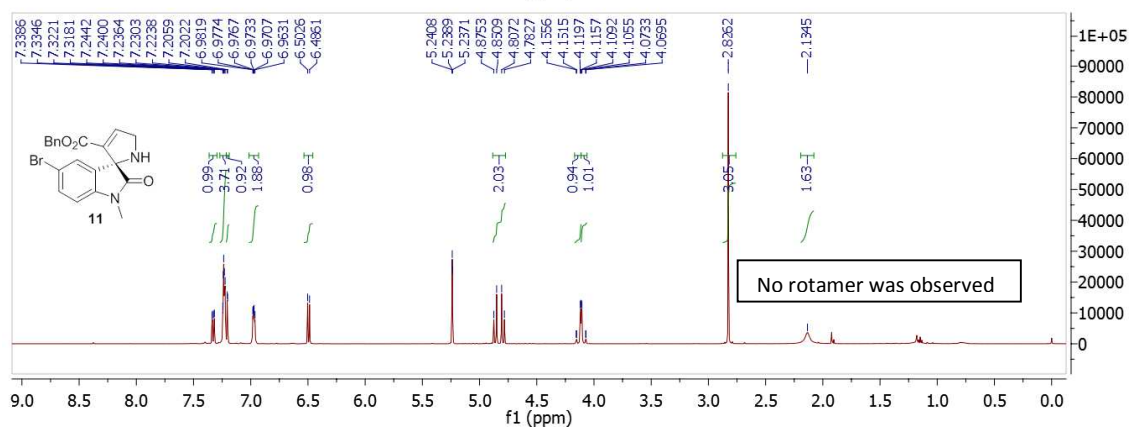

*N*-Boc moiety in spirooxindole adducts **3** causes a barrier to rotation and thus lead to form rotamers that can be detected in the NMR spectra and display low intensity signal. Boc-removal led to dissolving of rotamers into one enantiopure compound as shown in the above <sup>1</sup>H NMR snapshots.

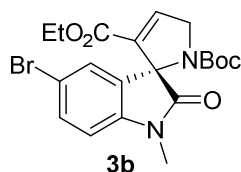

Chemical Formula: C<sub>20</sub>H<sub>23</sub>BrN<sub>2</sub>O<sub>5</sub>  
 Exact Mass: 450.07903  
 Molecular Weight: 451.31700

Yield: 86%; *e.e.* = 98.1%;  $[\alpha]_D^{20} = -66.4^\circ$  (*c* 0.95, CH<sub>2</sub>Cl<sub>2</sub>); IR  $\nu_{\max}/\text{cm}^{-1}$  3060, 2977, 2929, 2869, 1789, 1725, 1704; <sup>1</sup>H NMR (4:1 rotamer ratio, asterisks denote minor rotamer peaks, 400 MHz, CDCl<sub>3</sub>)  $\delta$  7.43 (dd, *J* = 8.2, 2.0 Hz, 1H), 7.40\* (dd, *J* = 8.2, 2.0 Hz, 0.3H), 7.18 (d, *J* = 2.0 Hz, 1H), 7.15\* (d, *J* = 1.9 Hz, 0.3H), 7.15 (t, *J* = 2.1 Hz, 1H), 7.10\* (t, *J* = 2.1 Hz, 0.3H), 6.71\* (d, *J* = 8.3 Hz, 0.3H), 6.68 (d, *J* = 8.2 Hz, 1H), 4.63 (dd, *J* = 18.4, 2.2 Hz, 1H), 4.61\* (dd, *J* = 18.2, 2.1 Hz, 0.3H), 4.56 (dd, *J* = 18.4, 2.1 Hz, 1H), 4.47\* (dd, *J* = 18.2, 2.1 Hz, 0.3H), 4.06 – 3.93 (m, 2H), 3.26\* (s, 0.8H), 3.22 (s, 3H), 1.38 (s, 2H), 1.11 (s, 9H), 1.12 – 1.06 (m, 3H); <sup>13</sup>C NMR (asterisks denote minor rotamer peaks, 101 MHz, CDCl<sub>3</sub>)  $\delta$  173.72, 173.68\*, 160.88\*, 160.83, 152.31, 151.91\*, 144.06\*, 143.92, 140.66\*, 140.50, 134.41\*, 134.36, 132.46\*, 132.42, 131.48, 126.20, 126.05\*, 115.21, 115.12\*, 109.77\*, 109.30, 81.35, 81.28\*, 72.40, 61.20, 61.13\*, 54.35\*, 54.12, 28.54, 28.07, 26.96\*, 26.72, 14.07, 14.02\*; HRMS [ESI]: Calculated for C<sub>20</sub>H<sub>24</sub>BrN<sub>2</sub>O<sub>5</sub> [M+H<sup>+</sup>]: 451.08631, found: 451.08619; Calculated for C<sub>20</sub>H<sub>24</sub><sup>81</sup>BrN<sub>2</sub>O<sub>5</sub> [M+H<sup>+</sup>]: 453.08426, found: 453.08414; RT = 51.9 min. (Chiral HPLC, chiralpak IC-column and using 30% of mixture of EtOH-DCM (1 : 50) in isohexane as eluent, Flow rate: 0.5 mL/min). (Chiral HPLC, column : chiralpak IC, eluent: 30% of mixture of EtOH-DCM (1 : 50) in isohexane, Flow rate: 0.5 mL/min).

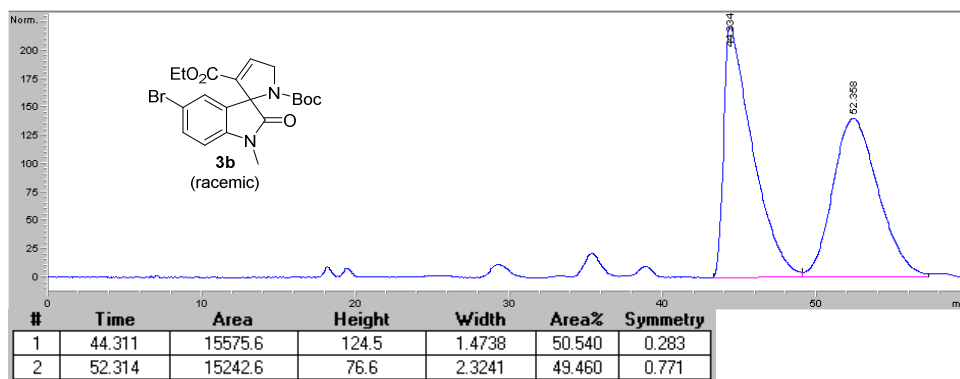

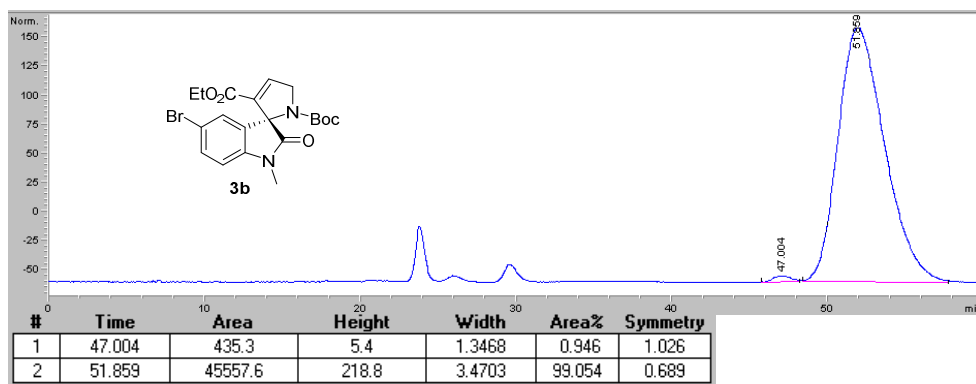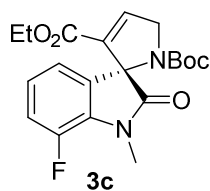

Chemical Formula:  $C_{20}H_{23}FN_2O_5$   
 Exact Mass: 390.15910  
 Molecular Weight: 390.41140

Yield: 85%; *e.e.* = 98.0%;  $[\alpha]_D^{20} = -26.8^\circ$  (*c* 1.25,  $CH_2Cl_2$ ); IR  $\nu_{max}/cm^{-1}$  2980, 2937, 2871, 1793, 1725, 1704;  $^1H$  NMR (4:1 rotamer ratio, asterisks denote minor rotamer peaks, 400 MHz,  $CDCl_3$ )  $\delta$  7.14 (t, *J* = 2.2 Hz, 1H), 7.09\* (t, *J* = 2.2 Hz, 0.25H), 7.03 (ddd, *J* = 11.5, 8.4, 1.1 Hz, 1H), 6.99\* (ddd, *J* = 11.4, 8.4, 1.2 Hz, 0.25H), 6.96 – 6.91 (m, 1H), 6.90 – 6.87\* (m, 0.25H), 6.84 (dd, *J* = 7.3, 1.1 Hz, 1H), 6.83\* (dd, *J* = 7.2, 1.1 Hz, 0.2H), 4.62 (dd, *J* = 18.3, 2.2 Hz, 1H), 4.61\* (dd, *J* = 18.2, 2.3 Hz, 0.25H), 4.55 (dd, *J* = 18.3, 2.1 Hz, 1H), 4.47\* (dd, *J* = 18.2, 2.1 Hz, 0.25H), 4.07 – 3.92 (m, 2H), 3.48\* (d, *J* = 2.6 Hz, 0.7H), 3.45 (d, *J* = 2.7 Hz, 3H), 1.37\* (s, 2H), 1.13 (s, 9H), 1.10 (t, *J* = 7.2 Hz, 3H), 1.06\* (t, *J* = 7.2 Hz, 0.7H);  $^{13}C$  NMR (asterisks denote minor rotamer peaks, 101 MHz,  $CDCl_3$ )  $\delta$  173.98, 160.95\*, 160.91, 152.37, 151.93\*, 149.10\*, 148.97, 146.68\*, 146.56, 140.45\*, 140.30, 134.68\*, 134.57, 132.43, 132.40\*, 131.35, 131.26\*, 123.32, 123.26, 123.10\*, 123.04\*, 118.79, 118.75, 118.64\*, 118.61\*, 117.89\*, 117.70, 117.50, 81.28, 81.15\*, 72.57, 72.54\*, 61.14, 61.06\*, 54.29\*, 54.04, 29.49\*, 29.43\*, 29.25, 29.19, 28.53, 28.04, 27.93\*, 14.03, 13.97\*; HRMS [ESI]: Calculated for  $C_{20}H_{24}FN_2O_5$  [ $M+H^+$ ]: 391.16638, found: 391.16687; RT = 45.8 min. (Chiral HPLC, column : chiralpak IC, eluent: 30% of mixture of EtOH-DCM (1 : 50) in isohexane, Flow rate: 0.5 mL/min).

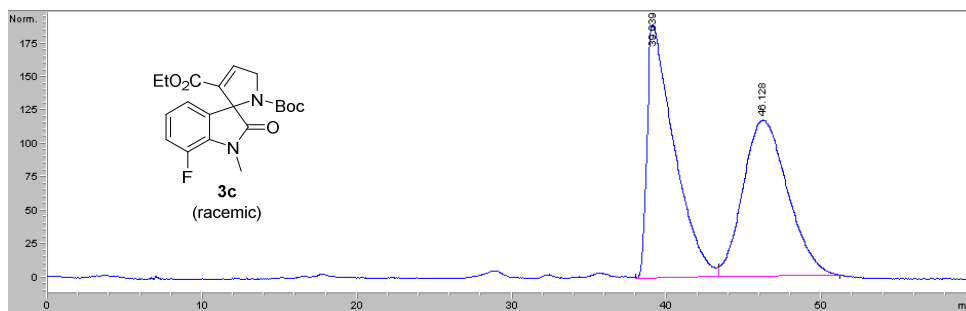

| # | Time   | Area    | Height | Width  | Area%  | Symmetry |
|---|--------|---------|--------|--------|--------|----------|
| 1 | 39.039 | 23143.4 | 189.3  | 2.0381 | 49.638 | 0        |
| 2 | 46.128 | 23481.2 | 117.1  | 3.3432 | 50.362 | 0.755    |

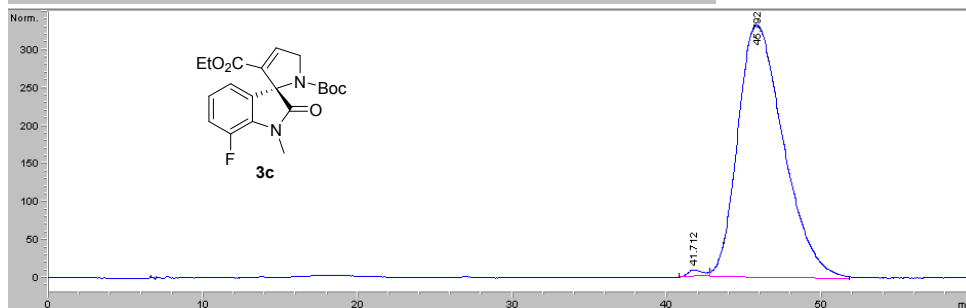

| # | Time   | Area    | Height | Width  | Area%  | Symmetry |
|---|--------|---------|--------|--------|--------|----------|
| 1 | 41.712 | 682.4   | 9.1    | 1.2454 | 0.985  | 3.65E-3  |
| 2 | 45.792 | 68603.9 | 333.4  | 3.4291 | 99.015 | 0.603    |

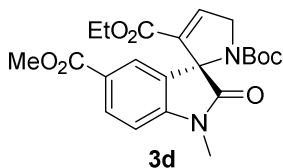

Chemical Formula: C<sub>22</sub>H<sub>26</sub>N<sub>2</sub>O<sub>7</sub>  
 Exact Mass: 430.17400  
 Molecular Weight: 430.45700

Yield: 88%; *e.e.* = 93.0%;  $[\alpha]_D^{20} = -73.3^\circ$  (*c* 1.4, CH<sub>2</sub>Cl<sub>2</sub>); IR  $\nu_{\max}/\text{cm}^{-1}$  2978, 1981, 1791, 1715; <sup>1</sup>H NMR (3:1 rotamer ratio, asterisks denote minor rotamer peaks, 400 MHz, CDCl<sub>3</sub>)  $\delta$  8.08 (dd, *J* = 8.2, 1.7 Hz, 1H), 8.04\* (dd, *J* = 8.2, 1.7 Hz, 0.34H), 7.74 (d, *J* = 1.6 Hz, 1H), 7.16 (t, *J* = 2.1 Hz, 1H), 7.11\* (t, *J* = 2.1 Hz, 0.3H), 6.87\* (d, *J* = 8.3 Hz, 0.35H), 6.84 (d, *J* = 8.2 Hz, 1H), 4.66 (dd, *J* = 18.5, 2.3 Hz, 1H), 4.63\* (dd, *J* = 18.1, 2.2 Hz, 0.3H), 4.60 (dd, *J* = 18.4, 2.2 Hz, 1H), 4.52\* (dd, *J* = 18.2, 2.2 Hz, 0.3H), 4.04 – 3.91 (m, 2H), 3.88 (s, 3H), 3.87\* (s, 1H), 3.31\* (s, 1H), 3.27 (s, 3H), 1.36\* (s, 3H), 1.08 (t, *J* = 7.1 Hz, 3H), 1.08 (s, 9H), 1.04\* (t, *J* = 7.1 Hz, 1H); <sup>13</sup>C NMR (asterisks denote minor rotamer peaks, 101 MHz, CDCl<sub>3</sub>)  $\delta$  174.62, 166.85, 160.88, 152.27, 151.92\*, 149.11\*, 148.90, 140.74\*, 140.56, 134.34\*, 134.30, 132.47, 130.68, 130.59\*, 129.60, 129.11, 124.77, 124.54\*, 124.17, 107.85\*, 107.44, 81.29, 81.23\*, 72.17, 61.17, 61.10\*, 54.35\*, 54.14, 52.26, 52.18\*, 28.53, 28.07, 27.08\*, 26.85, 26.18\*, 14.06, 14.01\*; HRMS [ESI]: Calculated for C<sub>22</sub>H<sub>27</sub>N<sub>2</sub>O<sub>7</sub> [M+H<sup>+</sup>]: 431.18128, found:



431.18165; RT = 14.7 min. (Chiral HPLC, column : chiralpak IA, eluent: 30% of mixture of EtOH-DCM (1 : 50) in isohexane, Flow rate: 0.5 mL/min).

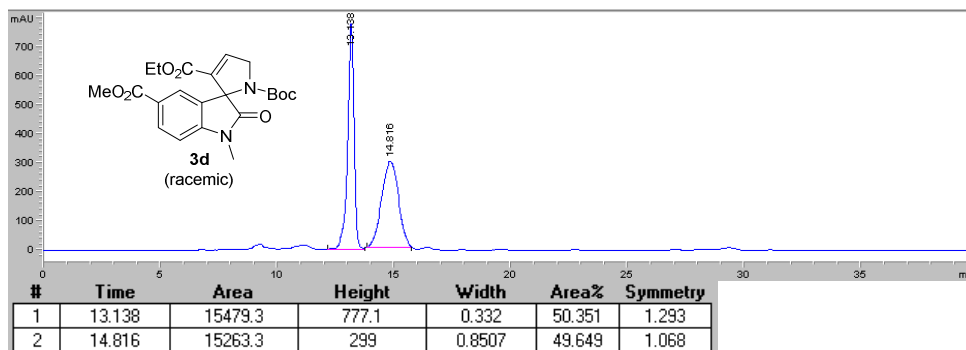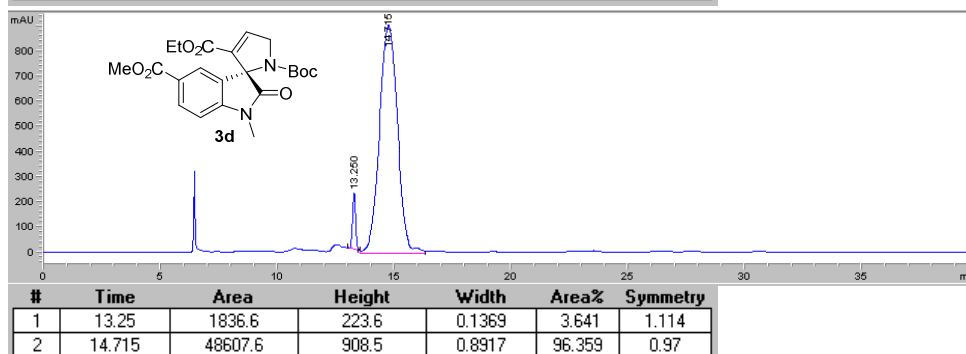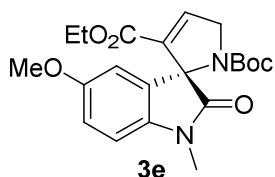

Chemical Formula:  $C_{21}H_{26}N_2O_6$   
 Exact Mass: 402.17909  
 Molecular Weight: 402.44700

Yield: 79%; *e.e.* = 97.1%;  $[\alpha]_D^{20} = -49.2^\circ$  (*c* 0.93,  $CH_2Cl_2$ ); IR  $\nu_{max}/cm^{-1}$  2978, 2935, 1788, 1719, 1701;  $^1H$  NMR (5:1 rotamer ratio, asterisks denote minor rotamer peaks, 400 MHz,  $CDCl_3$ )  $\delta$  7.13 (t, *J* = 2.1 Hz, 1H), 7.08\* (t, *J* = 2.2 Hz, 0.2H), 6.82 (dd, *J* = 8.4, 2.6 Hz, 1H), 6.79\* (dd, *J* = 8.4, 2.6 Hz, 0.2H), 6.73\* (d, *J* = 8.4 Hz, 0.2H), 6.69 (d, *J* = 8.4 Hz, 1H), 6.67 (d, *J* = 2.6 Hz, 1H), 6.66\* (d, *J* = 2.6 Hz, 0.2H), 4.62 (dd, *J* = 18.3, 2.2 Hz, 1H), 4.61\* (dd, *J* = 18.3, 2.2 Hz, 0.2H), 4.56 (dd, *J* = 18.3, 2.1 Hz, 1H), 4.47\* (dd, *J* = 18.2, 2.1 Hz, 0.2H), 4.04 – 3.89 (m, 2H), 3.74 (s, 3H), 3.74\* (s, 0.7H), 3.25\* (s, 0.7H), 3.20 (s, 3H), 1.37\* (s, 2H), 1.09 (s, 9H), 1.06 (t, *J* = 7.1 Hz, 3H), 1.03\* (t, *J* = 7.1 Hz, 0.5H);  $^{13}C$  NMR (asterisks denote minor rotamer peaks, 101 MHz,  $CDCl_3$ )  $\delta$  173.92, 173.84\*, 161.06\*, 161.00, 156.30, 156.10\*, 152.58, 151.86\*, 140.23\*, 140.10, 138.54\*, 138.40, 134.88\*, 134.80, 130.66, 129.99\*, 113.94, 113.40\*, 110.75\*, 110.31, 108.50\*, 108.18, 81.01, 80.91\*, 72.92, 61.01,

60.95\*, 56.06, 55.95\*, 54.33\*, 54.03, 28.55, 28.07, 27.94\*, 26.95\*, 26.69, 14.02, 13.98\*;  
 HRMS [ESI]: Calculated for C<sub>21</sub>H<sub>27</sub>N<sub>2</sub>O<sub>6</sub> [M+H<sup>+</sup>]: 403.18636, found: 403.18667; RT = 25.2  
 min. (Chiral HPLC, column : chiralpak IC, eluent: 50% of mixture of EtOH-DCM (1 : 50) in  
 isohexane, Flow rate: 0.5 mL/min).

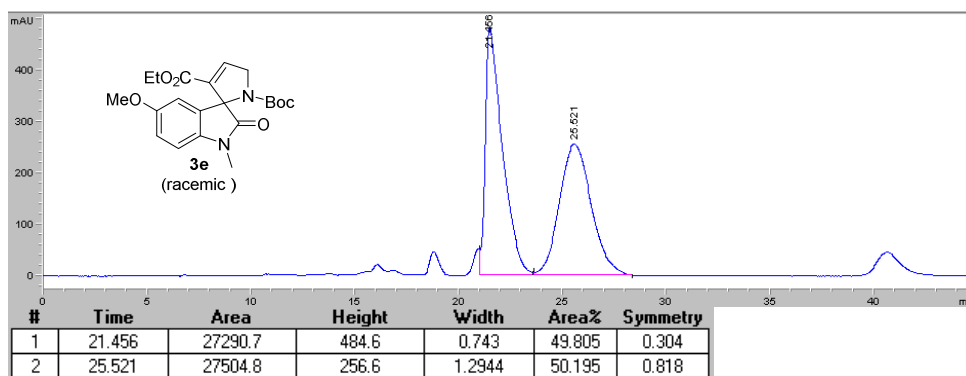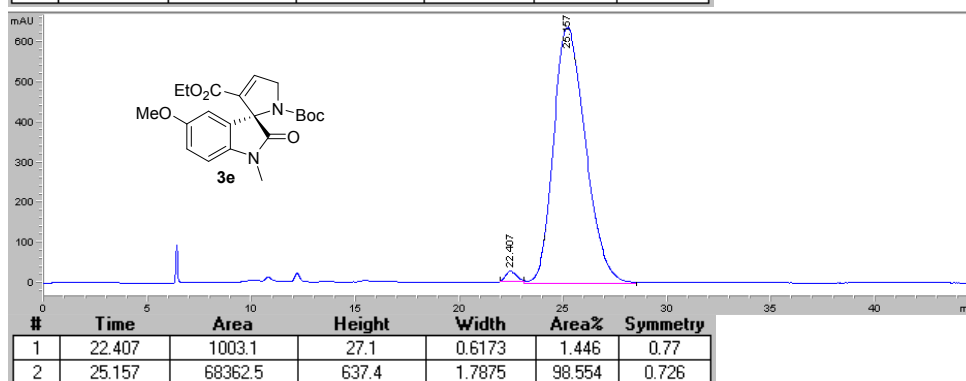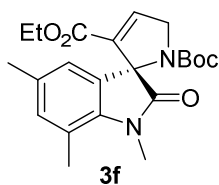

Chemical Formula: C<sub>22</sub>H<sub>28</sub>N<sub>2</sub>O<sub>5</sub>  
 Exact Mass: 400.19982  
 Molecular Weight: 400.47500

Yield: 82%; *e.e* = 97.5%;  $[\alpha]_D^{20} = -28.4^\circ$  (*c* 0.74, CH<sub>2</sub>Cl<sub>2</sub>); IR  $\nu_{\max}/\text{cm}^{-1}$  3337, 2980, 2934, 2864, 1789, 1724; <sup>1</sup>H NMR (5:1 rotamer ratio, asterisks denote minor rotamer peaks, 400 MHz, CDCl<sub>3</sub>)  $\delta$  7.10 (t, *J* = 2.2 Hz, 1H), 7.05\* (t, *J* = 2.2 Hz, 0.2H), 6.81 (s, 1H), 6.78\* (s, 0.2H), 6.68 (s, 1H), 6.67 (s, 0.2H), 4.60 (dd, *J* = 18.3, 2.3 Hz, 1H), 4.55 (dd, *J* = 18.3, 2.2 Hz, 1H), 4.46\* (dd, *J* = 18.2, 2.1 Hz, 0.2H), 4.08 – 3.90 (m, 2H), 3.52\* (s, 0.6H), 3.49 (s, 3H), 2.51\* (s, 0.7H), 2.50 (s, 3H), 2.21\* (s, 0.6H), 2.20 (s, 1H), 1.38\* (s, 1.8H), 1.11 (s, 9H), 1.10 (t, *J* = 7.1 Hz, 12H), 1.06\* (t, *J* = 7.2 Hz, 0.7H); <sup>13</sup>C NMR (asterisks denote minor rotamer peaks, 101 MHz, CDCl<sub>3</sub>)  $\delta$  174.95, 164.07, 161.13, 152.66, 139.97, 139.81\*, 139.66, 135.13,

134.00\*, 133.68, 132.23\*, 132.13, 130.16, 121.67, 121.61\*, 119.25\*, 118.98, 80.85, 80.72\*, 72.31, 60.95, 60.86\*, 53.93, 53.62\*, 30.34\*, 30.08, 28.01, 27.88\*, 20.95\*, 20.86, 19.16\*, 18.96, 14.04, 13.96\*; HRMS [ESI]: Calculated for C<sub>22</sub>H<sub>29</sub>N<sub>2</sub>O<sub>5</sub> [M+H<sup>+</sup>]: 401.20710, found: 401.20732; RT = 30.4 min. (Chiral HPLC, column : chiralpak IC, eluent: 50% of mixture of EtOH-DCM (1 : 50) in isohexane, Flow rate: 0.5 mL/min).

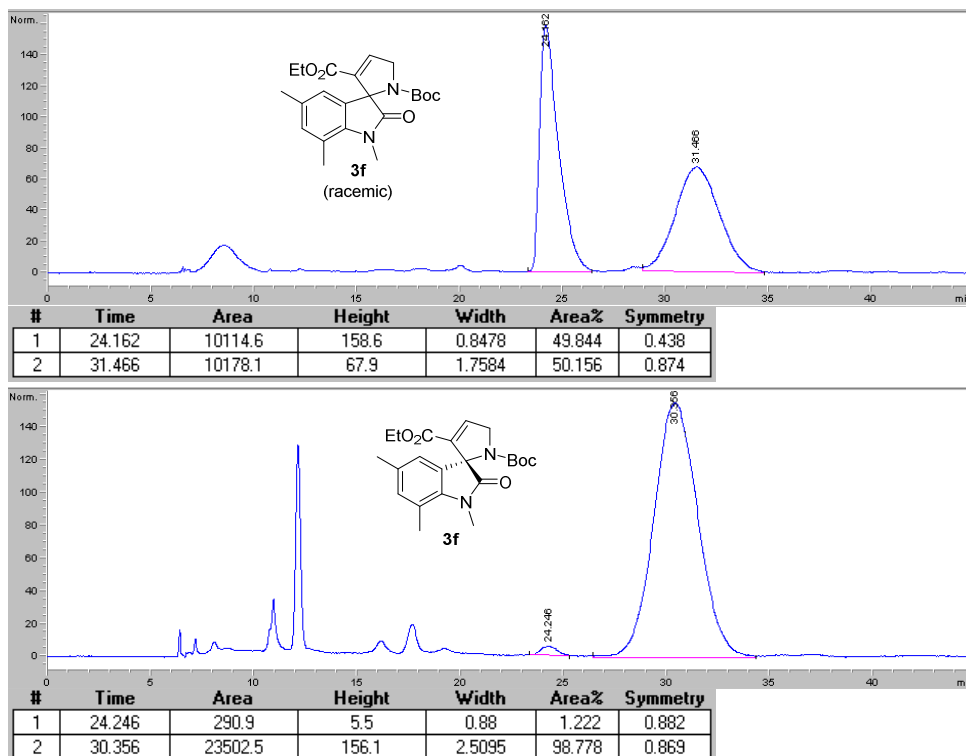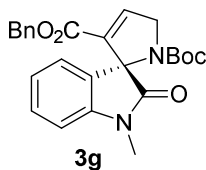

Chemical Formula: C<sub>25</sub>H<sub>26</sub>N<sub>2</sub>O<sub>5</sub>  
 Exact Mass: 434.18417  
 Molecular Weight: 434.49200

Yield: 76%; *e.e.* = 98.3%;  $[\alpha]_D^{20} = -25.7^\circ$  (*c* 1.1, CH<sub>2</sub>Cl<sub>2</sub>); IR  $\nu_{\max}/\text{cm}^{-1}$  2977, 2932, 1787, 17269, 1703; <sup>1</sup>H NMR (4:1 rotamer ratio, asterisks denote minor rotamer peaks, 400 MHz, CDCl<sub>3</sub>)  $\delta$  7.25 – 7.19 (m, 4H), 7.14 (t, *J* = 2.2 Hz, 1H), 7.09\* (t, *J* = 2.1 Hz, 0.21H), 7.01 – 6.90 (m, 4H), 6.58\* (d, *J* = 7.8 Hz, 0.21H), 6.55 (d, *J* = 7.7 Hz, 1H), 4.86 (d, *J* = 12.1 Hz, 1H), 4.85\* (d, *J* = 12.0 Hz, 0.21H), 4.80 (d, *J* = 12.1 Hz, 1H), 4.78\* (d, *J* = 12.2 Hz, 0.21H), 4.56 (dd, *J* = 18.4, 2.2 Hz, 1H), 4.55\* (dd, *J* = 18.4, 2.2 Hz, 0.21H), 4.50 (dd, *J* = 18.4, 2.2 Hz, 1H), 4.42\* (dd, *J* = 18.2, 2.1 Hz, 0.21H), 2.90\* (s, 0.55H), 2.85 (s, 1H), 1.29\* (s, 1.8H), 0.98 (s, 9H); <sup>13</sup>C NMR (asterisks denote minor rotamer peaks, 101 MHz, CDCl<sub>3</sub>)  $\delta$  174.08,

160.94, 152.52, 144.69, 141.14\*, 141.01, 134.95, 134.43, 129.60, 129.30\*, 128.98\*, 128.72, 128.60, 128.56\*, 122.90, 122.74, 122.56\*, 108.63\*, 108.15, 80.96, 80.90\*, 77.56, 77.25, 76.93, 72.52, 67.10, 54.29\*, 54.01, 29.50\*, 28.53, 27.99, 26.52\*, 26.25; HRMS [ESI]: Calculated for C<sub>25</sub>H<sub>27</sub>N<sub>2</sub>O<sub>5</sub> [M+H<sup>+</sup>]: 435.19145, found: 435.19162; RT = 25.6 min. (Chiral HPLC, column : chiralpak IC, eluent: 50% of mixture of EtOH-DCM (1 : 50) in isohexane, Flow rate: 0.5 mL/min).

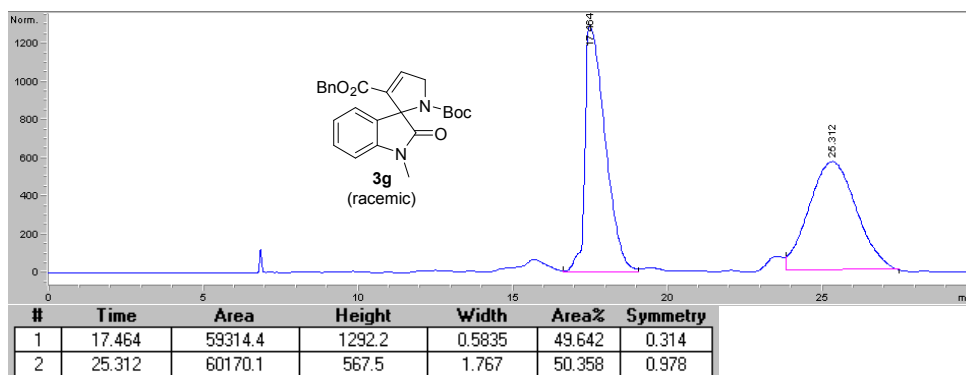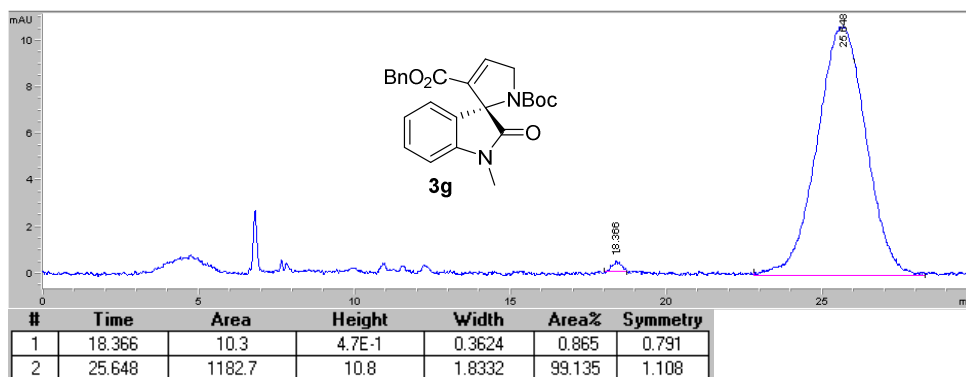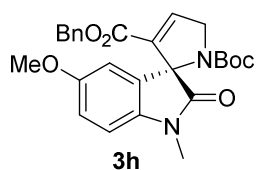

Chemical Formula: C<sub>26</sub>H<sub>28</sub>N<sub>2</sub>O<sub>6</sub>  
 Exact Mass: 464.19474  
 Molecular Weight: 464.51800

Yield: 71%; *e.e.* = 93.9%;  $[\alpha]_D^{20} = -37.3^\circ$  (*c* 1.13, CH<sub>2</sub>Cl<sub>2</sub>); IR  $\nu_{\max}/\text{cm}^{-1}$  2977, 2937, 1723, 1705, 1645; <sup>1</sup>H NMR (4:1 rotamer ratio, asterisks denote minor rotamer peaks, 400 MHz, CDCl<sub>3</sub>)  $\delta$  7.26 – 7.20 (m, 3H), 7.14 (t, *J* = 2.2 Hz, 1H), 7.09\* (t, *J* = 2.1 Hz, 0.25H), 6.98 (dd, *J* = 6.5, 3.1 Hz, 2H), 6.96\* (dd, *J* = 7.1, 3.3 Hz, 0.45H), 6.75 (dd, *J* = 8.4, 2.6 Hz, 1H), 6.71\* (dd, *J* = 8.5, 2.6 Hz, 0.26H), 6.61 (d, *J* = 2.6 Hz, 1H), 6.60\* (d, *J* = 2.7 Hz, 0.25H), 6.49\* (d, *J* = 8.4 Hz, 0.26H), 6.46 (d, *J* = 8.4 Hz, 1H), 4.88 (d, *J* = 12.1 Hz, 1H), 4.81 (d, *J* = 12.1 Hz,

1H), 4.79\* (d,  $J = 12.2$  Hz, 0.42H), 4.56 (dd,  $J = 18.4, 2.2$  Hz, 1H), 4.55\* (dd,  $J = 18.4, 2.2$  Hz, 0.25H), 4.49 (dd,  $J = 18.4, 2.2$  Hz, 1H), 4.41\* (dd,  $J = 18.2, 2.1$  Hz, 0.25H), 3.69 (s, 1H), 2.89\* (s, 0.6H), 2.84 (s, 3H), 1.30\* (s, 1.9H), 1.01 (s, 9H);  $^{13}\text{C}$  NMR (asterisks denote minor rotamer peaks, 101 MHz,  $\text{CDCl}_3$ )  $\delta$  172.53, 172.44\*, 159.78\*, 159.68, 155.08, 154.88\*, 151.31, 150.58\*, 139.94\*, 139.82, 137.17\*, 137.05, 133.74, 133.31\*, 133.23, 129.26, 128.57\*, 127.51, 127.47, 127.43\*, 127.38, 127.33\*, 112.79, 112.26\*, 109.39\*, 108.96, 107.61\*, 107.26, 79.80, 79.71\*, 71.62, 65.89, 54.86, 54.76\*, 53.09\*, 52.80, 27.32, 26.82, 25.39\*, 25.11; HRMS [ESI]: Calculated for  $\text{C}_{26}\text{H}_{29}\text{N}_2\text{O}_6$  [ $\text{M}+\text{H}^+$ ]: 465.20201, found: 465.20188; RT = 30.6 min. (Chiral HPLC, column : chiralpak IC, eluent: 50% of mixture of EtOH-DCM (1 : 50) in isohexane, Flow rate: 0.5 mL/min).

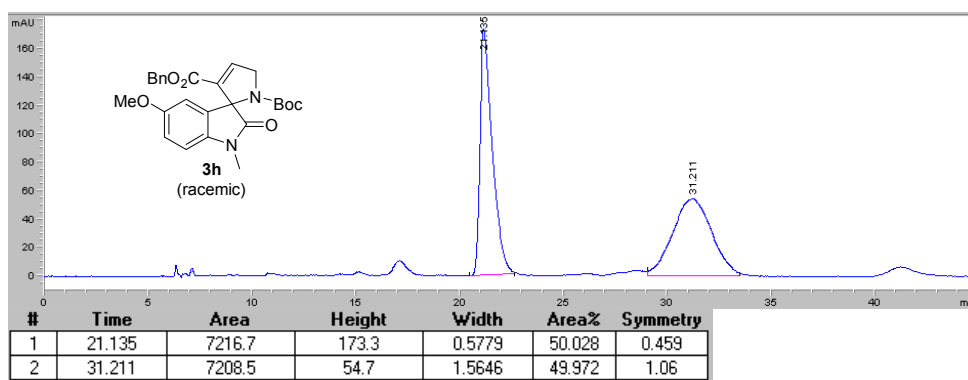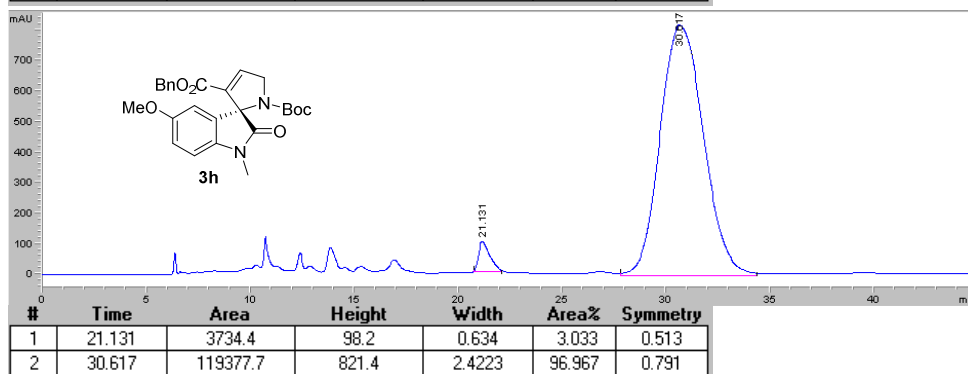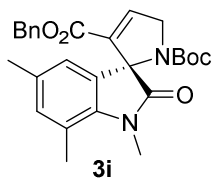

Chemical Formula:  $\text{C}_{27}\text{H}_{30}\text{N}_2\text{O}_5$   
 Exact Mass: 462.21547  
 Molecular Weight: 462.54600

Yield: 62%;  $e.e = 96.0\%$ ;  $[\alpha]_D^{20} = -27.6^\circ$  ( $c$  1.02,  $\text{CH}_2\text{Cl}_2$ ); IR  $\nu_{\text{max}}/\text{cm}^{-1}$  2977, 2931, 2868, 1788, 1721, 1704;  $^1\text{H}$  NMR (5:1 rotamer ratio, asterisks denote minor rotamer peaks, 400

MHz, CDCl<sub>3</sub>) δ 7.36 – 7.27 (m, 4H), 7.20 (t, *J* = 2.1 Hz, 1H), 7.13\* (t, *J* = 2.0 Hz, 0.2H), 7.07 – 7.01 (m, 2H), 6.80 (s, 1H), 6.76\* (s, 0.2H), 6.69 (s, 1H), 4.98 (d, *J* = 12.1 Hz, 1H), 4.87 (d, *J* = 12.2 Hz, 1H), 4.86\* (d, *J* = 12.1 Hz, 0.2H), 4.60 (dd, *J* = 18.3, 2.0 Hz, 1H), 4.55 (dd, *J* = 18.4, 2.1 Hz, 1H), 4.46\* (dd, *J* = 18.1, 2.1 Hz, 0.2H), 3.22\* (s, 0.5H), 3.16 (s, 3H), 2.32 (s, 3H), 2.23 (s, 3H), 2.22\* (s, 0.5H), 1.37\* (s, 1.7H), 1.08 (s, 9H); <sup>13</sup>C NMR (asterisks denote minor rotamer peaks, 101 MHz, CDCl<sub>3</sub>) δ 174.77, 161.11, 152.61, 152.56\*, 140.74, 139.92, 135.06, 134.79, 134.02\*, 133.65, 132.40\*, 132.14, 129.99, 128.74, 128.70\*, 128.65, 128.56, 128.51\*, 128.32\*, 121.70, 121.61\*, 119.17, 98.07, 80.86, 80.74\*, 72.17, 67.07, 67.00\*, 54.29\*, 53.91, 53.62\*, 30.03\*, 29.71, 28.61, 28.51\*, 28.08\*, 27.98, 20.96\*, 20.87, 18.89; HRMS [ESI]: Calculated for C<sub>27</sub>H<sub>31</sub>N<sub>2</sub>O<sub>5</sub> [M+H<sup>+</sup>]: 463.22275, found: 463.22298; RT = 24.4 min. (Chiral HPLC, column : chiralpak IC, eluent: 60% of mixture of EtOH-DCM (1 : 50) in isohexane, Flow rate: 0.5 mL/min).

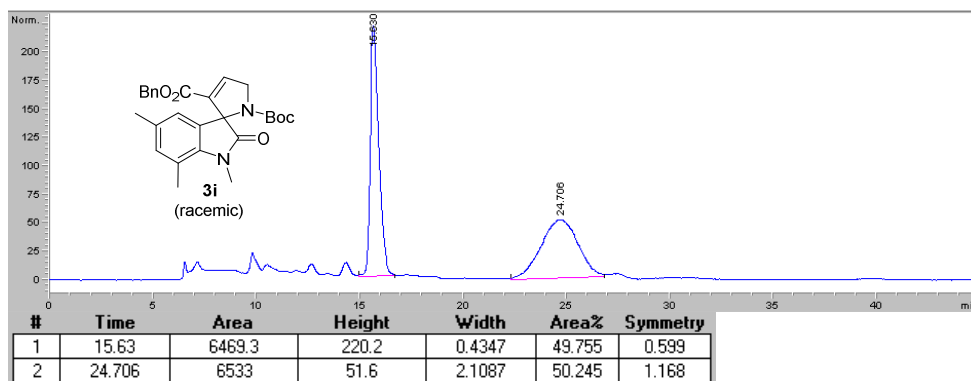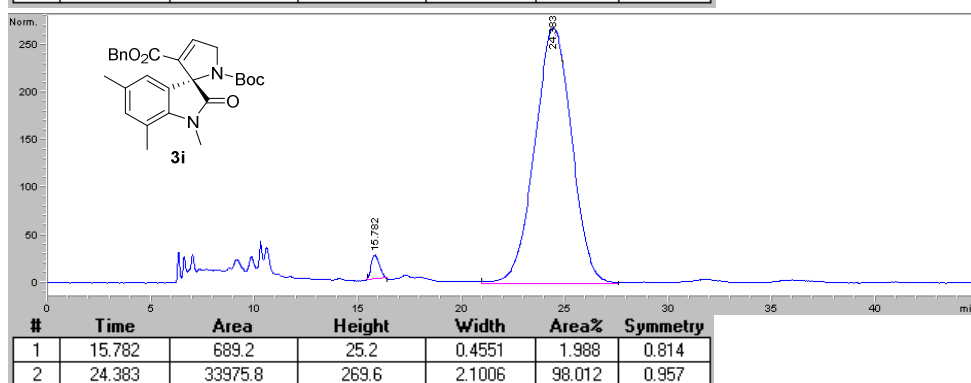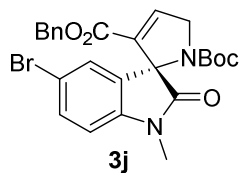

Chemical Formula: C<sub>25</sub>H<sub>25</sub>BrN<sub>2</sub>O<sub>5</sub>

Exact Mass: 512.09468

Molecular Weight: 513.38800

Yield: 80%; *e.e.* = 97.6%;  $[\alpha]_D^{20} = -62.8^\circ$  (*c* 1.1, CH<sub>2</sub>Cl<sub>2</sub>); IR  $\nu_{\max}/\text{cm}^{-1}$  3064, 2976, 2934, 1727, 1703; <sup>1</sup>H NMR (3.5:1 rotamer ratio, asterisks denote minor rotamer peaks, 400 MHz, CDCl<sub>3</sub>)  $\delta$  7.41 (dd, *J* = 8.2, 2.0 Hz, 1H), 7.37\* (dd, *J* = 8.2, 2.0 Hz, 0.28H), 7.34 – 7.29 (m, 3H), 7.23 (t, *J* = 2.2 Hz, 1H), 7.18 (d, *J* = 2.0 Hz, 1H), 7.17\* (t, *J* = 2.2 Hz, 0.28H), 7.16\* (d, *J* = 2.0 Hz, 0.28H), 7.08 – 7.05 (m, 2H), 7.03\* (dd, *J* = 6.3, 3.2 Hz, 0.56H), 6.51\* (d, *J* = 7.8 Hz, 0.28H), 6.49 (d, *J* = 8.2 Hz, 1H), 4.96 (d, *J* = 12.1 Hz, 1H), 4.89 (d, *J* = 12.1 Hz, 1H), 4.86\* (d, *J* = 12.1 Hz, 0.28H), 4.63 (dd, *J* = 18.5, 2.2 Hz, 1H), 4.61\* (dd, *J* = 18.5, 2.2 Hz, 0.28H), 4.56 (dd, *J* = 18.5, 2.2 Hz, 1H), 4.47\* (dd, *J* = 18.3, 2.1 Hz, 0.3H), 2.95\* (s, 0.8H), 2.91 (s, 3H), 1.37\* (s, 2.6H), 1.09 (s, 9H); <sup>13</sup>C NMR (asterisks denote minor rotamer peaks, 101 MHz, CDCl<sub>3</sub>)  $\delta$  173.56, 173.51\*, 160.78\*, 160.69, 152.26, 151.86\*, 143.90\*, 143.78, 141.65\*, 141.49, 134.83, 134.06\*, 134.00, 132.34, 131.33, 129.00, 128.79, 128.76\*, 128.73\*, 126.20, 126.03\*, 115.17, 115.07\*, 110.02\*, 109.51, 81.36, 81.31\*, 72.30, 67.26, 54.33\*, 54.10, 28.53, 28.04, 26.61\*, 26.36; HRMS [ESI]: Calculated for C<sub>25</sub>H<sub>26</sub>BrN<sub>2</sub>O<sub>5</sub> [M+H<sup>+</sup>]: 513.10196, found: 513.10250; Calculated for C<sub>25</sub>H<sub>26</sub><sup>81</sup>BrN<sub>2</sub>O<sub>5</sub> [M+H<sup>+</sup>]: 515.09991, found: 515.10048; RT = 17.7 min. (Chiral HPLC, column : chiralpak IC, eluent: 50% of mixture of EtOH-DCM (1 : 50) in isohexane, Flow rate: 0.5 mL/min).

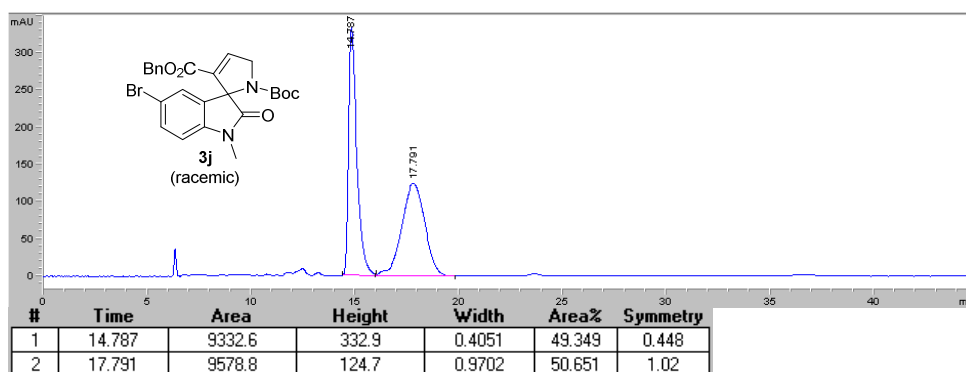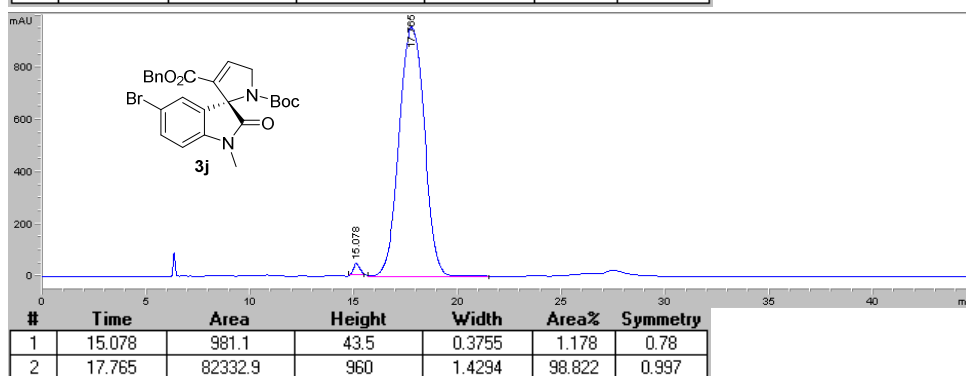

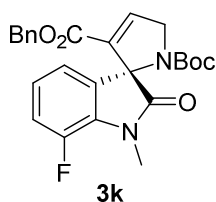

Chemical Formula: C<sub>25</sub>H<sub>25</sub>FN<sub>2</sub>O<sub>5</sub>

Exact Mass: 452.17475

Molecular Weight: 452.48240

Yield: 86%; *e.e* = 98.1%;  $[\alpha]_D^{20} = -26.4^\circ$  (*c* 0.9, CH<sub>2</sub>Cl<sub>2</sub>); IR  $\nu_{\max}/\text{cm}^{-1}$  3037, 2979, 2868, 1792, 1729; <sup>1</sup>H NMR (4:1 rotamer ratio, asterisks denote minor rotamer peaks, 400 MHz, CDCl<sub>3</sub>)  $\delta$  7.33 – 7.28 (m, 3H), 7.22 (t, *J* = 1.8 Hz, 1H), 7.16\* (t, *J* = 2.0 Hz, 0.23H), 7.08 – 6.88 (m, 4H), 6.85 (dd, *J* = 7.3, 1.1 Hz, 1H), 6.82\* (s, 0.1H), 4.96 (d, *J* = 12.0 Hz, 1H), 4.95\* (d, *J* = 12.0 Hz, 0.25H), 4.88 (d, *J* = 12.1 Hz, 1H), 4.86\* (d, *J* = 12.1 Hz, 0.25H), 4.62 (dd, *J* = 18.4, 2.0 Hz, 1H), 4.60\* (dd, *J* = 18.3, 2.3 Hz, 0.25H), 4.54 (dd, *J* = 18.5, 2.1 Hz, 1H), 4.46\* (dd, *J* = 18.3, 2.0 Hz, 0.25H), 3.15\* (d, *J* = 2.5 Hz, 0.7H), 3.11 (d, *J* = 2.6 Hz, 3H), 1.36\* (s, 2.2H), 1.10 (s, 9H); <sup>13</sup>C NMR (asterisks denote minor rotamer peaks, 101 MHz, CDCl<sub>3</sub>)  $\delta$  173.81, 173.77\*, 160.89\*, 160.79, 152.32, 151.85\*, 149.00\*, 148.90, 146.57\*, 146.48, 141.41\*, 141.31, 134.73, 134.32\*, 134.19, 132.26, 132.22, 131.53\*, 131.44\*, 131.32, 131.24, 128.85, 128.83\*, 128.76, 128.72\*, 128.65, 123.30, 123.23, 123.06\*, 123.00\*, 118.82, 118.79, 118.65\*, 118.62\*, 117.91\*, 117.69, 117.50, 81.28, 81.15\*, 72.44, 72.41, 67.31, 54.27\*, 54.02, 29.11\*, 29.05\*, 28.84, 28.79, 28.52, 28.02; HRMS [ESI]: Calculated for C<sub>25</sub>H<sub>26</sub>FN<sub>2</sub>O<sub>5</sub> [M+H<sup>+</sup>]: 453.18203, found: 453.18149; RT = 17.6 min. (Chiral HPLC, column : chiralpak IC, eluent: 50% of mixture of EtOH-DCM (1 : 50) in isohexane, Flow rate: 0.5 mL/min).

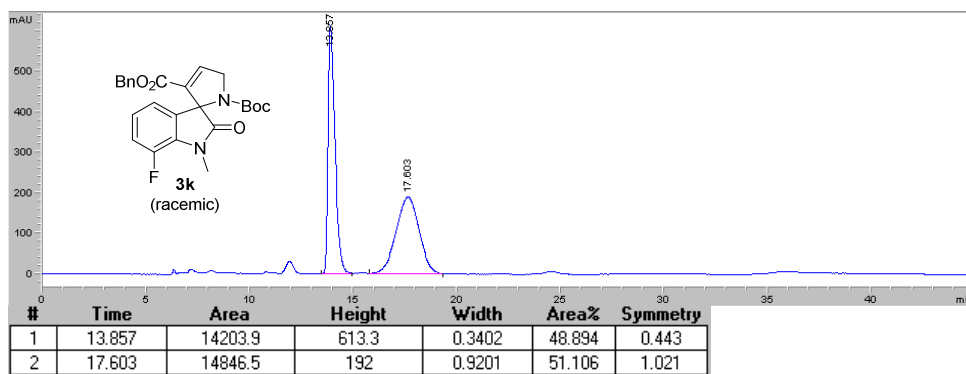



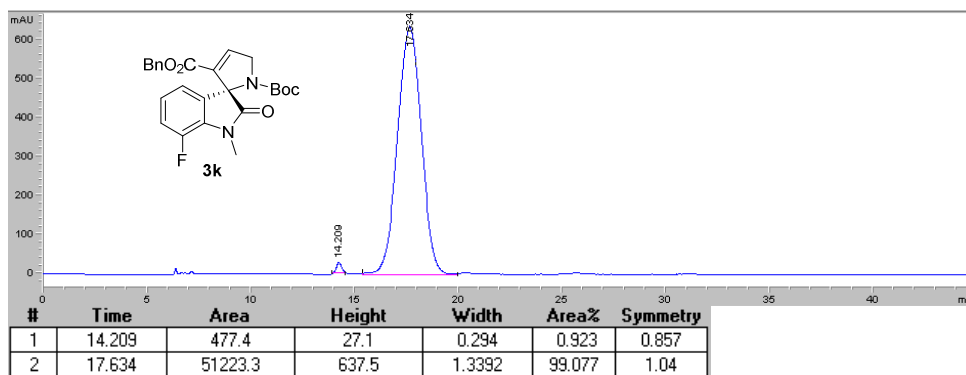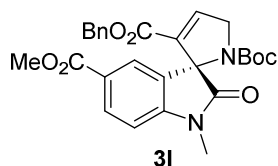

Chemical Formula:  $C_{27}H_{28}N_2O_7$   
 Exact Mass: 492.18965  
 Molecular Weight: 492.52800

Yield: 77%; *e.e.* = 97.5%;  $[\alpha]_D^{20} = -60.4^\circ$  (*c* 0.92,  $CH_2Cl_2$ ); IR  $\nu_{max}/cm^{-1}$  3065, 2977, 2864, 1790, 1712;  $^1H$  NMR (3:1 rotamer ratio, asterisks denote minor rotamer peaks, 400 MHz,  $CDCl_3$ )  $\delta$  8.05 (dd, *J* = 8.2, 1.7 Hz, 1H), 8.00\* (dd, *J* = 8.2, 1.7 Hz, 0.33H), 7.84\* (d, *J* = 1.6 Hz, 0.2H), 7.73 (d, *J* = 1.7 Hz, 1H), 7.33 – 7.26 (m, 4H), 7.24 (t, *J* = 2.1 Hz, 1H), 7.19\* (t, *J* = 2.1 Hz, 0.3H), 7.07 – 6.96 (m, 2H), 6.65\* (d, *J* = 8.2 Hz, 0.3H), 6.64 (d, *J* = 8.2 Hz, 1H), 4.91 (d, *J* = 12.0 Hz, 1H), 4.90\* (d, *J* = 12.2 Hz, 0.3H), 4.86 (d, *J* = 12.0 Hz, 1H), 4.83\* (d, *J* = 12.1 Hz, 0.3H), 4.65 (dd, *J* = 18.5, 2.2 Hz, 1H), 4.62\* (dd, *J* = 18.2, 2.2 Hz, 0.3H), 4.59 (dd, *J* = 18.5, 2.2 Hz, 1H), 4.52\* (dd, *J* = 18.3, 2.1 Hz, 0.3H), 3.89 (s, 3H), 3.88\* (s, 1H), 2.98\* (s, 1H), 2.94 (s, 3H), 1.35\* (s, 2.6H), 1.05 (s, 8H);  $^{13}C$  NMR (101 MHz,  $CDCl_3$ )  $\delta$  174.46, 167.12\*, 166.82, 160.80\*, 160.71, 152.22, 151.86\*, 148.94\*, 148.74, 141.73\*, 141.57, 134.76, 134.38\*, 133.97\*, 133.93, 132.99\*, 132.37, 129.43, 128.85, 128.78, 128.75, 124.72, 124.49\*, 124.17, 124.13\*, 108.11\*, 107.68, 81.29, 81.25\*, 72.07, 67.27, 67.24\*, 54.32\*, 54.12, 52.28, 52.19\*, 28.51, 28.03, 27.93\*, 26.70\*, 26.45; HRMS [ESI]: Calculated for  $C_{27}H_{29}N_2O_7$   $[M+H]^+$ : 493.19693, found: 493.19690; RT = 19.6 min. (Chiral HPLC, column : chiralpak IC, eluent: 50% of mixture of EtOH-DCM (1 : 50) in isohexane, Flow rate: 0.5 mL/min).

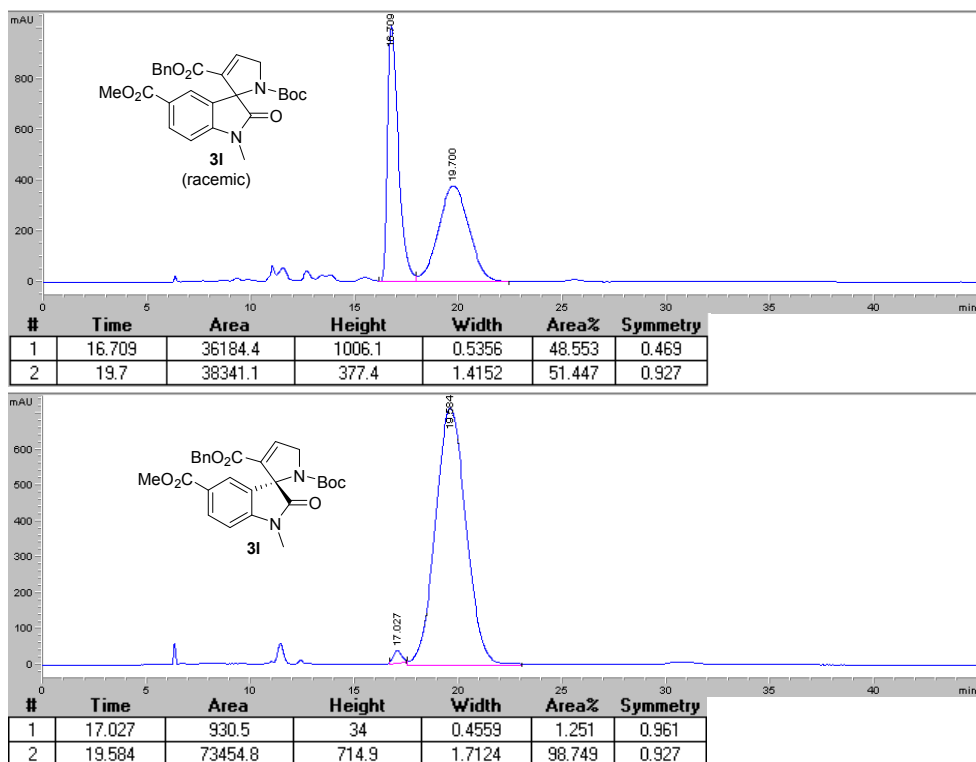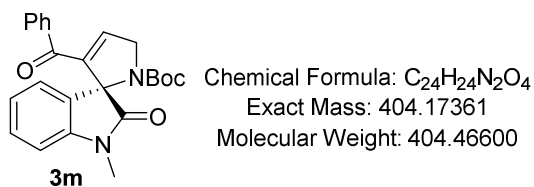

Yield: 71%; *ee* = 97.7%;  $[\alpha]_D^{20} = -3.1^\circ$  (*c* 0.7,  $CH_2Cl_2$ ); IR  $\nu_{max}/cm^{-1}$  3058, 2981, 2930, 1786, 1724, 1705;  $^1H$  NMR (7:1 rotamer ratio, asterisks denote minor rotamer peaks, 400 MHz,  $CDCl_3$ )  $\delta$  7.64 (d, *J* = 7.1 Hz, 1H), 7.52 (t, *J* = 7.4 Hz, 1H), 7.40 (t, *J* = 7.6 Hz, 1H), 7.30 – 7.26 (m, 1H), 7.12 (d, *J* = 7.2 Hz, 1H), 6.98 (t, *J* = 7.4 Hz, 1H), 6.95\* (t, *J* = 7.4 Hz, 0.15H), 6.85\* (d, *J* = 7.9 Hz, 0.16H), 6.83 (t, *J* = 2.2 Hz, 1H), 6.81 (d, *J* = 7.8 Hz, 1H), 6.75\* (t, *J* = 2.0 Hz, 1H), 4.74 (d, *J* = 2.1 Hz, 1H), 4.68\* (dd, *J* = 20.5, 2.1 Hz, 1H), 3.35\* (s, 0.4H), 3.30 (s, 1H), 1.39\* (s, 1.4H), 1.09 (s, 9H);  $^{13}C$  NMR (asterisks denote minor rotamer peaks, 101 MHz,  $CDCl_3$ )  $\delta$  189.69, 174.38, 152.70, 145.05, 145.01\*, 141.60, 140.97, 140.81\*, 137.66\*, 137.58, 132.97, 132.90\*, 129.77\*, 129.73, 129.15, 128.66\*, 128.63, 122.70, 122.55\*, 122.46, 122.33\*, 108.68\*, 108.20, 81.05, 80.96\*, 73.50, 54.95\*, 54.71, 28.58, 28.04, 27.05\*, 26.76; HRMS [ESI]: Calculated for  $C_{24}H_{25}N_2O_4$   $[M+H]^+$ : 405.18088, found:

405.18136; RT = 29.3 min. (Chiral HPLC, column : chiralpak IC, eluent: 50% of mixture of EtOH-DCM (1 : 50) in isohexane, Flow rate: 0.5 mL/min).

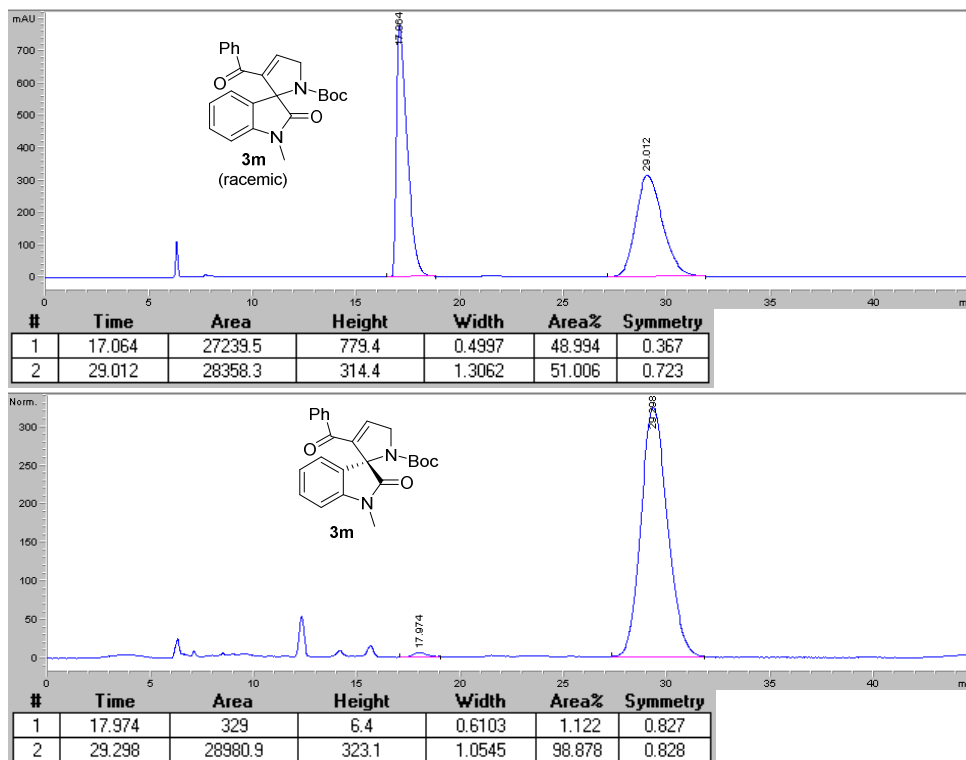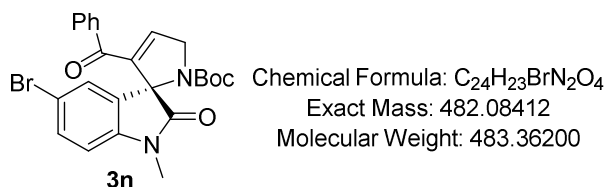

Yield: 78%; *e.e* = 99.6%;  $[\alpha]_D^{20} = -35.4^\circ$  (*c* 0.78,  $CH_2Cl_2$ ); IR  $\nu_{max}/cm^{-1}$  2978, 2928, 1788, 1733, 1705;  $^1H$  NMR (4:1 rotamer ratio, asterisks denote minor rotamer peaks, 400 MHz,  $CDCl_3$ )  $\delta$  7.67 – 7.62 (m, 2H), 7.56 – 7.50 (m, 1H), 7.44 – 7.39 (m, 3H), 7.37\* (dd, *J* = 8.3, 2.0 Hz, 0.25H), 7.23 (d, *J* = 2.0 Hz, 1H), 7.22\* (d, *J* = 2.0 Hz, 0.25H), 6.87 (t, *J* = 2.2 Hz, 1H), 6.79\* (t, *J* = 2.2 Hz, 0.25H), 6.74\* (d, *J* = 8.3 Hz, 0.25H), 6.70 (d, *J* = 8.3 Hz, 1H), 4.75 (dd, *J* = 18.6, 2.0 Hz, 1H), 4.72\* (dd, *J* = 18.4, 2.2 Hz, 0.25H), 4.70 (dd, *J* = 18.7, 2.1 Hz, 1H), 4.62\* (dd, *J* = 18.5, 2.1 Hz, 0.25H), 3.32\* (s, 0.7H), 3.28 (s, 3H), 1.40\* (s, 2H), 1.13 (s, 9H);  $^{13}C$  NMR (asterisks denote minor rotamer peaks, 101 MHz,  $CDCl_3$ )  $\delta$  189.54, 173.87, 152.44, 151.95\*, 144.26\*, 144.15, 141.75, 141.62\*, 141.25, 141.22\*, 137.45\*, 137.37, 133.10, 133.03\*, 132.52\*, 132.45, 131.28, 130.48\*, 129.12, 128.75, 128.73\*, 125.74,

125.60\*, 115.11, 115.04\*, 110.10\*, 109.61, 81.42, 81.33\*, 73.65\*, 73.25, 54.99\*, 54.80, 29.90\*, 28.57, 28.09, 27.11\*, 26.84; HRMS [ESI]: Calculated for C<sub>24</sub>H<sub>24</sub>BrN<sub>2</sub>O<sub>4</sub> [M+H<sup>+</sup>]: 483.09140, found: 483.09130; Calculated for C<sub>24</sub>H<sub>24</sub><sup>81</sup>BrN<sub>2</sub>O<sub>4</sub> [M+H<sup>+</sup>]: 485.08935, found: 485.08951; RT = 18.2 min. (Chiral HPLC, column : chiralpak IC, eluent: 50% of mixture of EtOH-DCM (1 : 50) in isohexane, Flow rate: 0.5 mL/min).

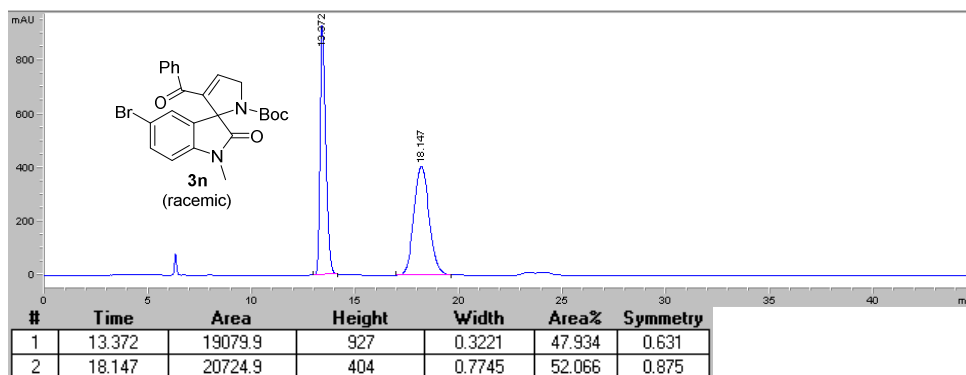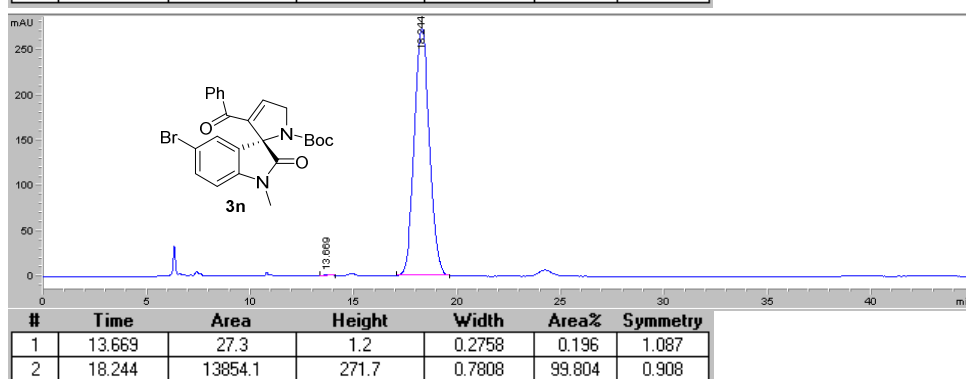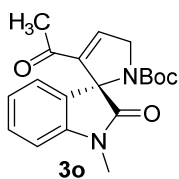

Chemical Formula: C<sub>19</sub>H<sub>22</sub>N<sub>2</sub>O<sub>4</sub>  
 Exact Mass: 342.15796  
 Molecular Weight: 342.39500

Yield: 87%; *ee* = 99.1%; [ $\alpha$ ]<sub>D</sub><sup>20</sup> = -48.99° (*c* 1.14, CH<sub>2</sub>Cl<sub>2</sub>); IR  $\nu_{\max}$ /cm<sup>-1</sup> 3058, 2977, 2931, 2865, 1784, 1723, 1700; <sup>1</sup>H NMR (7:1 rotamer ratio, asterisks denote minor rotamer peaks, 400 MHz, CDCl<sub>3</sub>)  $\delta$  7.31 – 7.26 (m, 1H), 7.14\* (d, *J* = 7.2 Hz, 0.1H), 7.02 (t, *J* = 2.1 Hz, 1H), 7.00 – 6.95 (m, 2H), 6.95 – 6.93\* (m, 0.15H), 6.85\* (d, *J* = 7.9 Hz, 0.16H), 6.80 (d, *J* = 7.7 Hz, 1H), 4.69 (dd, *J* = 18.8, 2.4 Hz, 1H), 4.67\* (dd, *J* = 18.5, 2.3 Hz, 0.14H), 4.64 (dd, *J* = 19.1, 2.4 Hz, 1H), 4.55\* (dd, *J* = 18.6, 2.1 Hz, 0.14H), 3.29\* (s, 0.46H), 3.24 (s, 3H), 2.21 (s, 3H), 2.19\* (s, 0.43H), 1.36\* (s, 1.4H), 1.06 (s, 9H); <sup>13</sup>C NMR (asterisks denote minor

rotamer peaks, 101 MHz, CDCl<sub>3</sub>) δ 192.30, 174.23, 152.64, 144.92, 143.32, 139.71, 139.67\*, 129.62\*, 129.58, 129.47\*, 122.57, 122.42\*, 122.33, 122.19\*, 108.54\*, 108.06, 81.01, 80.91\*, 72.67, 54.52\*, 54.29, 28.54, 28.00, 27.87\*, 26.95\*, 26.73, 26.65; HRMS [ESI]: Calculated for C<sub>19</sub>H<sub>23</sub>N<sub>2</sub>O<sub>4</sub> [M+H]<sup>+</sup>: 343.16523, found: 343.16574; RT = 37.2 min. (Chiral HPLC, column : chiralpak IC, eluent: 50% of mixture of EtOH-DCM (1 : 50) in isohexane, Flow rate: 0.5 mL/min).

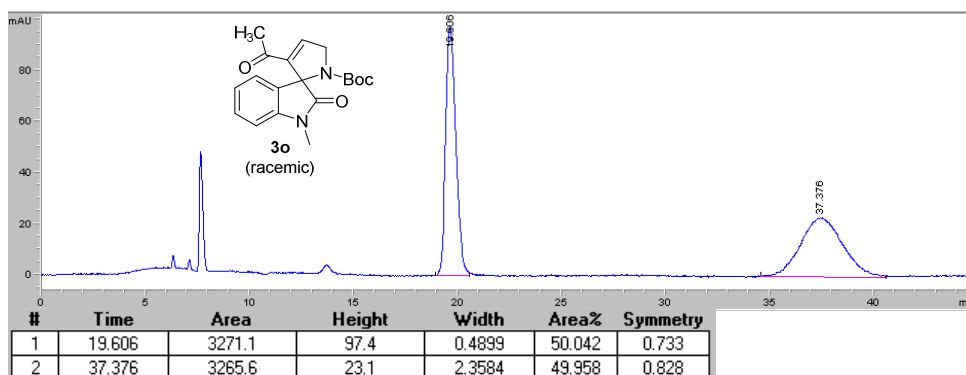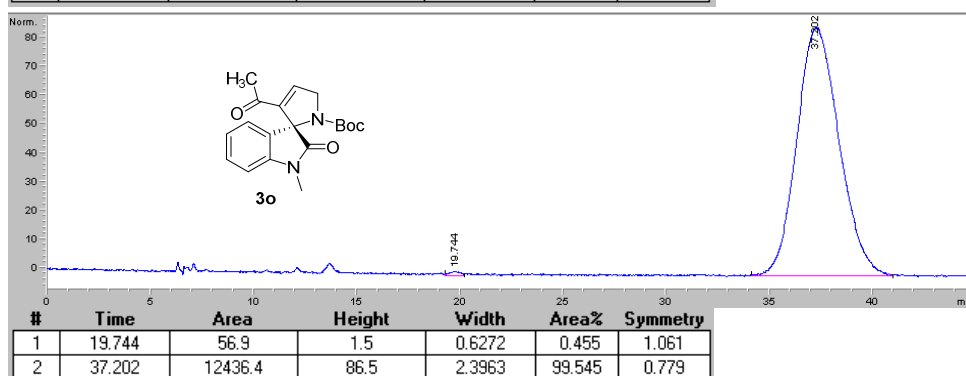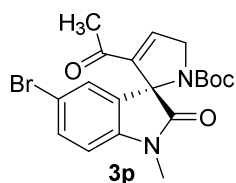

Chemical Formula: C<sub>19</sub>H<sub>21</sub>BrN<sub>2</sub>O<sub>4</sub>  
 Exact Mass: 420.06847  
 Molecular Weight: 421.29100

Yield: 82%; *e.e* = 98.1%; [α]<sub>D</sub><sup>20</sup> = -121.5° (*c* 0.93, CH<sub>2</sub>Cl<sub>2</sub>); IR ν<sub>max</sub>/cm<sup>-1</sup> 3076, 2977, 2932, 2866, 1786, 1729, 1702; <sup>1</sup>H NMR (4.5:1 rotamer ratio, asterisks denote minor rotamer peaks, 400 MHz, CDCl<sub>3</sub>) δ 7.39 (dd, *J* = 8.2, 2.0 Hz, 1H), 7.36\* (dd, *J* = 8.3, 2.0 Hz, 0.22H), 7.09 (d, *J* = 2.0 Hz, 1H), 7.07\* (d, *J* = 2.0 Hz, 0.22H), 7.04 (t, *J* = 2.2 Hz, 1H), 6.97\* (t, *J* = 2.2 Hz, 0.22H), 6.71\* (d, *J* = 8.3 Hz, 0.22H), 6.67 (d, *J* = 8.2 Hz, 1H), 4.68 (dd, *J* = 18.9, 2.3 Hz, 1H), 4.65\* (dd, *J* = 18.9, 2.3 Hz, 0.2H), 4.61 (dd, *J* = 18.8, 2.2 Hz, 1H), 4.53\* (dd, *J* = 18.6,

2.1 Hz, 0.22H), 3.25\* (s, 0.7H), 3.20 (s, 3H), 2.22 (s, 3H), 2.21\* (s, 0.7H), 1.36\* (s, 2H), 1.09 (s, 9H);  $^{13}\text{C}$  NMR (asterisks denote minor rotamer peaks, 101 MHz,  $\text{CDCl}_3$ )  $\delta$  192.31, 192.14\*, 173.71, 152.36, 151.76\*, 144.15\*, 144.02, 142.93, 142.88\*, 140.25, 132.33\*, 132.27, 131.50, 130.74\*, 125.66, 125.50\*, 114.99, 114.92\*, 109.98\*, 109.48, 81.38, 81.28\*, 72.76\*, 72.42, 54.57\*, 54.39, 28.53, 28.04, 27.01\*, 26.73, 26.70; HRMS [ESI]: Calculated for  $\text{C}_{19}\text{H}_{22}\text{BrN}_2\text{O}_4$  [ $\text{M}+\text{H}^+$ ]: 421.07575, found: 421.07599; Calculated for  $\text{C}_{19}\text{H}_{22}^{81}\text{BrN}_2\text{O}_4$  [ $\text{M}+\text{H}^+$ ]: 423.07370, found: 423.07393; RT = 23.5 min. (Chiral HPLC, column : chiralpak IC, eluent: 50% of mixture of EtOH-DCM (1 : 50) in isohexane, Flow rate: 0.5 mL/min).

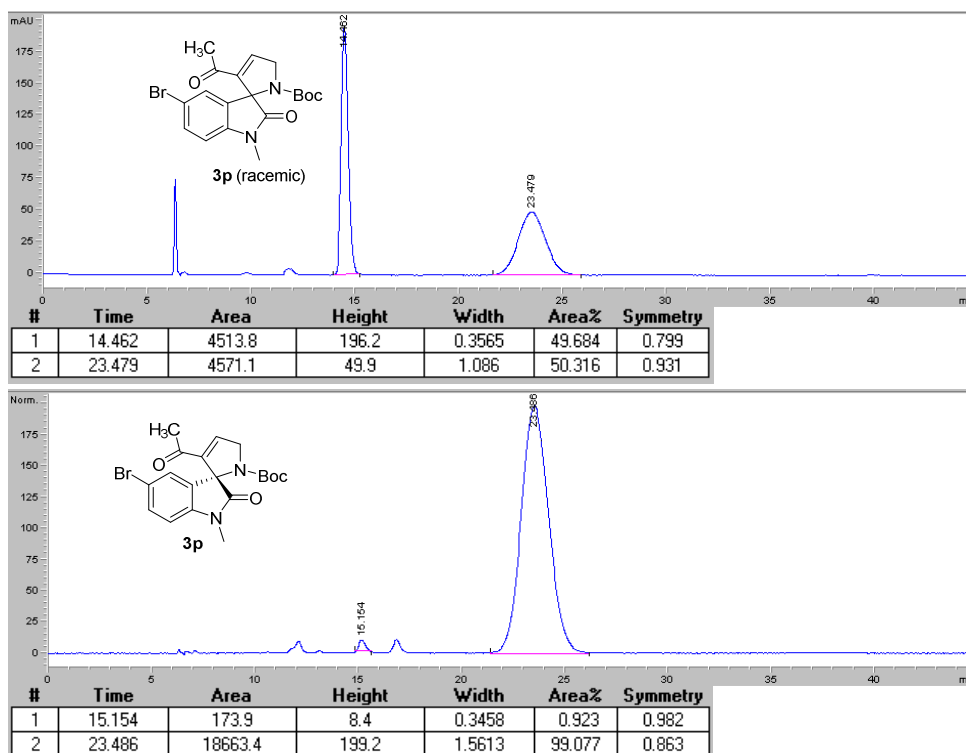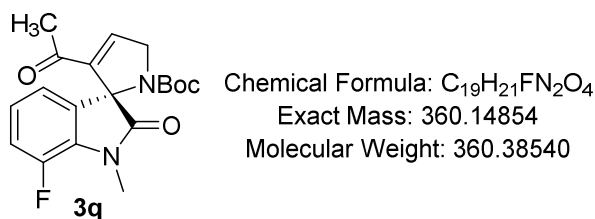

Yield: 85%; *e.e.* = 99.7%;  $[\alpha]_{\text{D}}^{20} = -54.7^\circ$  (*c* 1.0,  $\text{CH}_2\text{Cl}_2$ ); IR  $\nu_{\text{max}}/\text{cm}^{-1}$  3076, 2978, 2931, 2866, 1786, 1729, 1702;  $^1\text{H}$  NMR (6:1 rotamer ratio, asterisks denote minor rotamer peaks, 400 MHz,  $\text{CDCl}_3$ )  $\delta$  7.03 (t, *J* = 2.2 Hz, 1H), 7.02 – 6.97 (m, 1H), 6.96\* (t, *J* = 2.2 Hz, 0.17H), 6.95 – 6.92 (m, 1H), 6.92 – 6.86\* (m, 0.16H), 6.83 (dd, *J* = 8.2, 4.0 Hz, 1H), 6.77\*

(dd,  $J = 7.3, 1.0$  Hz, 0.15H), 6.76 (dd,  $J = 7.3, 1.1$  Hz, 1H), 4.68 (dd,  $J = 18.8, 2.3$  Hz, 1H), 4.67\* (dd,  $J = 18.8, 2.2$  Hz, 0.16H), 4.62 (dd,  $J = 18.9, 2.2$  Hz, 1H), 4.53\* (dd,  $J = 18.6, 2.1$  Hz, 0.17H), 3.49\* (d,  $J = 2.6$  Hz, 0.5H), 3.45 (d,  $J = 2.7$  Hz, 3H), 2.23 (s, 3H), 2.20\* (s, 0.5H), 1.37\* (s, 1.5H), 1.12 (s, 9H);  $^{13}\text{C}$  NMR (asterisks denote minor rotamer peaks, 101 MHz,  $\text{CDCl}_3$ )  $\delta$  192.31, 192.11\*, 173.99, 152.44, 151.77\*, 149.07, 146.65, 143.19, 143.16\*, 139.93, 139.87\*, 132.41, 123.12, 123.06, 122.91\*, 122.84\*, 118.24, 118.21, 118.08\*, 118.05\*, 117.8\*8, 117.68\*, 117.64, 117.44, 81.33, 81.16\*, 72.61, 72.58, 54.52\*, 54.33, 29.54\*, 29.49\*, 29.27, 29.21, 28.53, 28.02, 27.91\*, 26.71\*, 26.68; HRMS [ESI]: Calculated for  $\text{C}_{19}\text{H}_{22}\text{FN}_2\text{O}_4$  [ $\text{M}+\text{H}^+$ ]: 361.15581, found: 361.15632; RT = 23.4 min. (Chiral HPLC, column : chiralpak IC, eluent: 50% of mixture of EtOH-DCM (1 : 50) in isohexane, Flow rate: 0.5 mL/min).

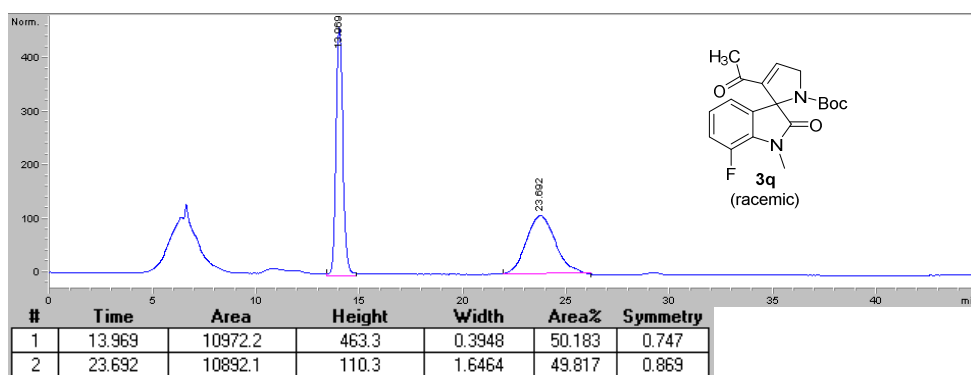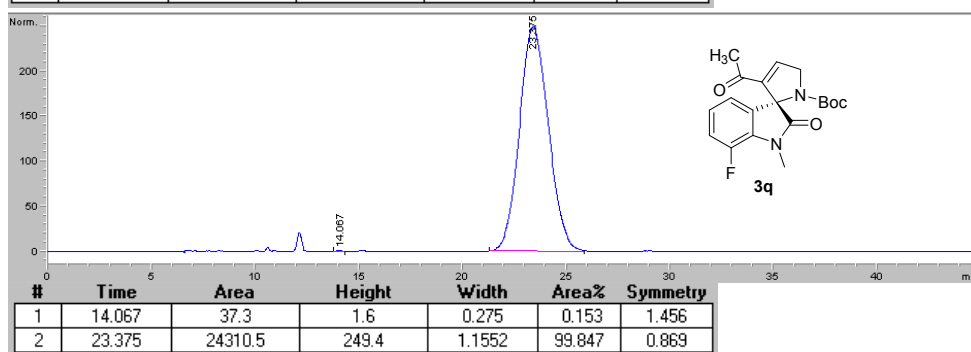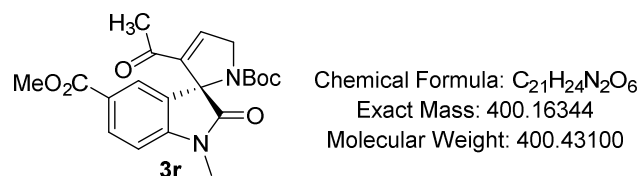

Yield: 87%;  $e.e = 99.6\%$ ;  $[\alpha]_{\text{D}}^{20} = -129.3^\circ$  ( $c$  1.15,  $\text{CH}_2\text{Cl}_2$ ); IR  $\nu_{\text{max}}/\text{cm}^{-1}$  2977, 1787, 1736, 1711;  $^1\text{H}$  NMR (4:1 rotamer ratio, asterisks denote minor rotamer peaks, 400 MHz,  $\text{CDCl}_3$ )  $\delta$

8.05 (dd,  $J = 8.2, 1.7$  Hz, 1H), 8.01\* (dd,  $J = 8.2, 1.7$  Hz, 0.23H), 7.67 (dd,  $J = 1.7, 0.4$  Hz, 1H), 7.06 (t,  $J = 2.2$  Hz, 1H), 6.99\* (t,  $J = 2.2$  Hz, 0.25H), 6.88\* (d,  $J = 8.2$  Hz, 0.25H), 6.84 (d,  $J = 8.2$  Hz, 1H), 4.72 (dd,  $J = 18.8, 2.2$  Hz, 1H), 4.69\* (dd,  $J = 18.8, 2.2$  Hz, 0.24H), 4.67 (dd,  $J = 18.7, 2.1$  Hz, 2H), 4.59\* (dd,  $J = 18.6, 2.1$  Hz, 0.25H), 3.87 (s, 3H), 3.86\* (s, 0.74H), 3.32\* (s, 0.74H), 3.27 (s, 3H), 2.23 (s, 3H), 2.21\* (s, 0.74H), 1.36\* (s, 2H), 1.07 (s, 9H);  $^{13}\text{C}$  NMR (asterisks denote minor rotamer peaks, 101 MHz,  $\text{CDCl}_3$ )  $\delta$  192.40, 192.23\*, 174.61, 167.24\*, 166.90, 152.33, 151.77\*, 149.23\*, 149.03, 142.97\*, 142.91, 140.31, 132.34, 129.63, 128.88\*, 124.53, 124.31\*, 123.69, 108.00\*, 107.57, 81.33, 81.25\*, 72.18, 54.5\*8, 54.42, 53.62\*, 52.22, 52.15\*, 28.53, 28.05, 27.13\*, 26.86, 26.66; HRMS [ESI]: Calculated for  $\text{C}_{21}\text{H}_{24}\text{N}_2\text{O}_6$  [ $\text{M}+\text{H}^+$ ]: 401.17071, found: 401.17101; RT = 27.2 min. (Chiral HPLC, column : chiralpak IC, eluent: 50% of mixture of EtOH-DCM (1 : 50) in isohexane, Flow rate: 0.5 mL/min).

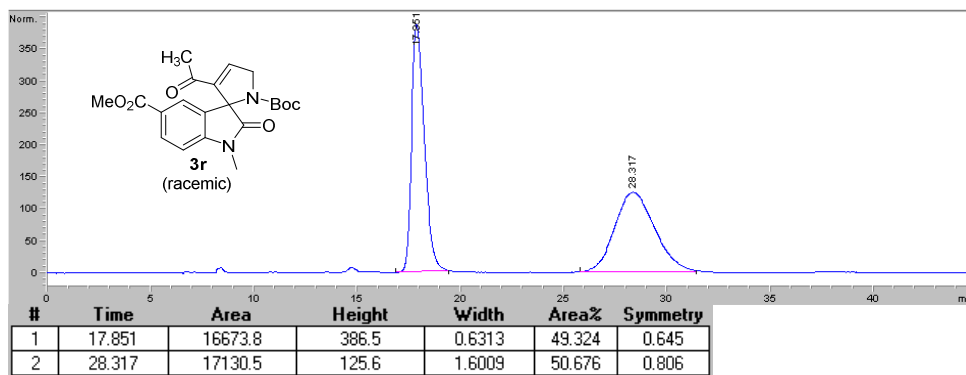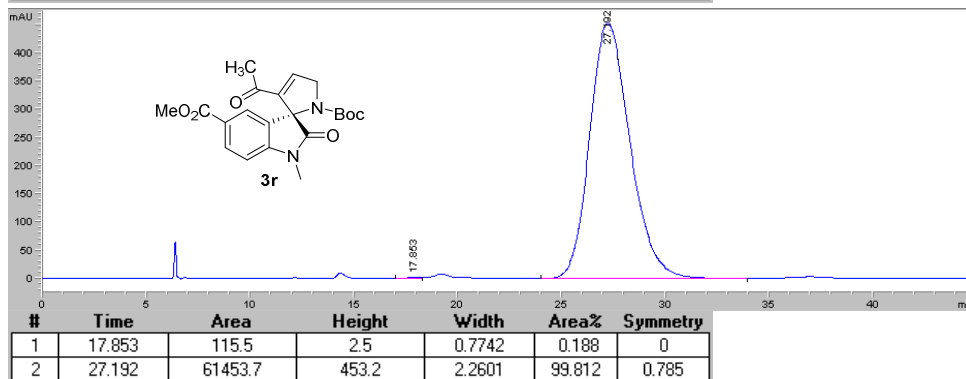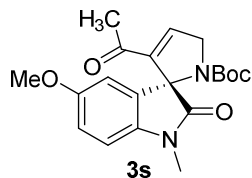

Chemical Formula:  $\text{C}_{20}\text{H}_{24}\text{N}_2\text{O}_5$   
 Exact Mass: 372.16852  
 Molecular Weight: 372.42100



Yield: 83%; *e.e.* = 99.7%;  $[\alpha]_D^{20} = -91.6^\circ$  (*c* 0.98, CH<sub>2</sub>Cl<sub>2</sub>); IR  $\nu_{\max}/\text{cm}^{-1}$  3070, 2975, 2933, 2837, 1784, 1699, 1677; <sup>1</sup>H NMR (6:1 rotamer ratio, asterisks denote minor rotamer peaks, 400 MHz, CDCl<sub>3</sub>)  $\delta$  7.02 (t, *J* = 2.2 Hz, 1H), 6.95\* (t, *J* = 2.1 Hz, 0.16H), 6.79 (dd, *J* = 8.4, 2.5 Hz, 1H), 6.76\* (d, *J* = 2.3 Hz, 0.15H), 6.74\* (d, *J* = 8.5 Hz, 0.2H), 6.69 (d, *J* = 8.4 Hz, 1H), 6.60 (d, *J* = 2.4 Hz, 1H), 4.68 (dd, *J* = 18.8, 2.3 Hz, 1H), 4.66\* (dd, *J* = 18.8, 2.3 Hz, 0.13H), 4.62 (dd, *J* = 18.8, 2.2 Hz, 1H), 4.53\* (dd, *J* = 18.6, 2.0 Hz, 0.17H), 3.72 (s, 4H), 3.26\* (s, 0.5H), 3.21 (s, 3H), 2.21 (s, 3H), 2.19\* (s, 0.5H), 1.36\* (s, 1.5H), 1.08 (s, 9H); <sup>13</sup>C NMR (asterisks denote minor rotamer peaks, 101 MHz, CDCl<sub>3</sub>)  $\delta$  192.26, 192.10\*, 173.88, 156.16, 155.96\*, 152.64, 151.72\*, 143.31, 143.26\*, 139.77, 139.72\*, 138.65\*, 138.53, 130.73, 130.05\*, 113.45, 112.93\*, 110.60\*, 110.18, 108.63\*, 108.28, 81.05, 80.92\*, 72.95, 56.01, 55.90\*, 54.53\*, 54.29, 28.55, 28.05, 27.03\*, 26.75, 26.72; HRMS [ESI]: Calculated for C<sub>20</sub>H<sub>25</sub>N<sub>2</sub>O<sub>5</sub> [M+H<sup>+</sup>]: 373.17580, found: 373.17631; RT = 26.8 min. (Chiral HPLC, chiralpak IC-column and using 60% of mixture of EtOH-DCM (1 : 50) in isohexane as eluent, Flow rate: 0.5 mL/min).

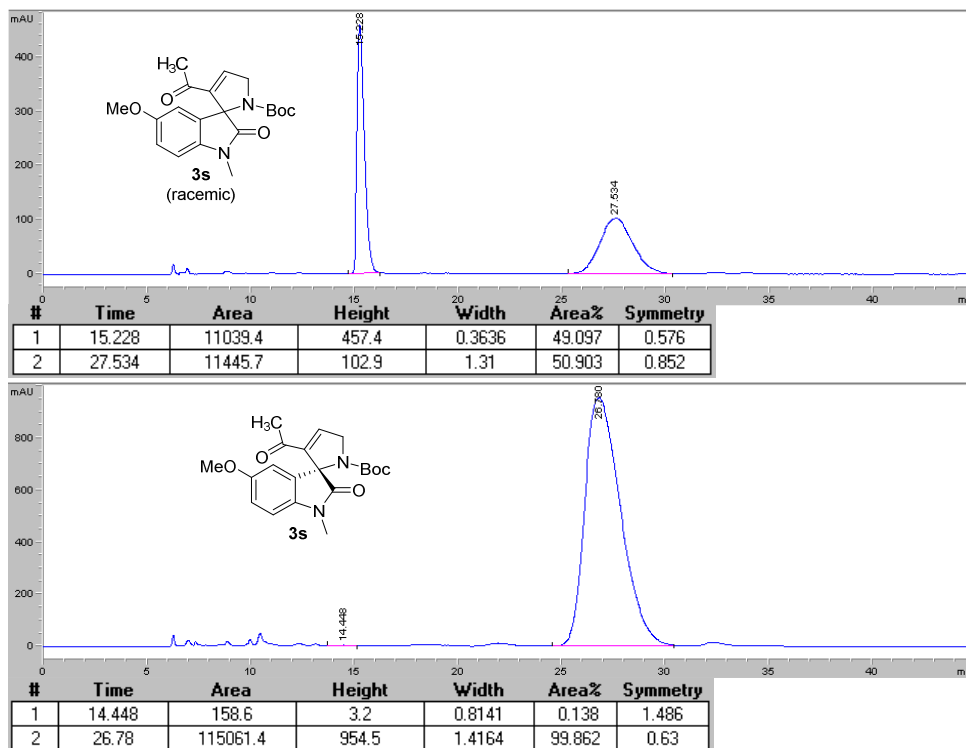

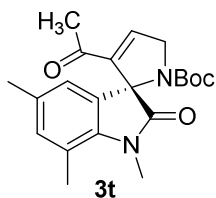

Chemical Formula: C<sub>21</sub>H<sub>26</sub>N<sub>2</sub>O<sub>4</sub>

Exact Mass: 370.18926

Molecular Weight: 370.44900

Yield: 66%; *e.e* = 99.7%;  $[\alpha]_D^{20} = -38.9^\circ$  (*c* 0.62, CH<sub>2</sub>Cl<sub>2</sub>); IR  $\nu_{\max}/\text{cm}^{-1}$  2975, 2924, 2862, 1703, 1680; <sup>1</sup>H NMR (7:1 rotamer ratio, asterisks denote minor rotamer peaks, 400 MHz, CDCl<sub>3</sub>)  $\delta$  6.93 (t, *J* = 2.2 Hz, 1H), 6.86\* (t, *J* = 2.2 Hz, 0.14H), 6.74 (s, 1H), 6.71\* (s, 0.13H), 6.54 (s, 1H), 4.61 (dd, *J* = 18.4, 1.9 Hz, 1H), 4.60\* (dd, *J* = 18.6, 2.1 Hz, 0.14H), 4.56 (dd, *J* = 18.4, 2.0 Hz, 1H), 4.47\* (dd, *J* = 18.6, 2.1 Hz, 0.15H), 3.46\* (s, 0.4H), 3.43 (s, 3H), 2.46\* (s, 0.4H), 2.44 (s, 3H), 2.16 (s, 3H), 2.13 (s, 3H), 2.12\* (s, 0.4H), 1.32\* (s, 1.4H), 1.04 (s, 9H); <sup>13</sup>C NMR (asterisks denote minor rotamer peaks, 101 MHz, CDCl<sub>3</sub>)  $\delta$  192.37, 174.98, 152.73, 143.69, 140.14, 139.36, 133.65, 131.92, 130.21, 121.15, 119.22, 80.92, 72.39, 54.20, 30.14, 28.62, 27.99, 26.77, 20.86, 19.00; HRMS [ESI]: Calculated for C<sub>21</sub>H<sub>27</sub>N<sub>2</sub>O<sub>4</sub> [M+H<sup>+</sup>]: 371.19653, found: 371.19723; RT = 23.2 min. (Chiral HPLC, column : chiralpak IA, eluent: 30% of mixture of EtOH-DCM (1 : 50) in isohexane, Flow rate: 0.5 mL/min).

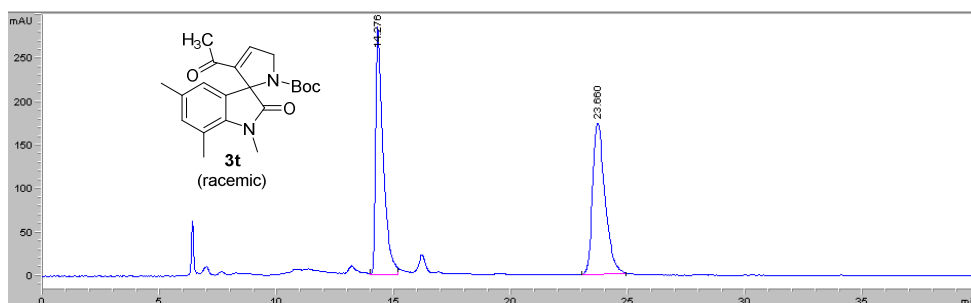

| # | Time   | Area   | Height | Width  | Area%  | Symmetry |
|---|--------|--------|--------|--------|--------|----------|
| 1 | 14.276 | 6528.9 | 285.1  | 0.3312 | 50.425 | 0.407    |
| 2 | 23.66  | 6418.8 | 174.2  | 0.5379 | 49.575 | 0.637    |

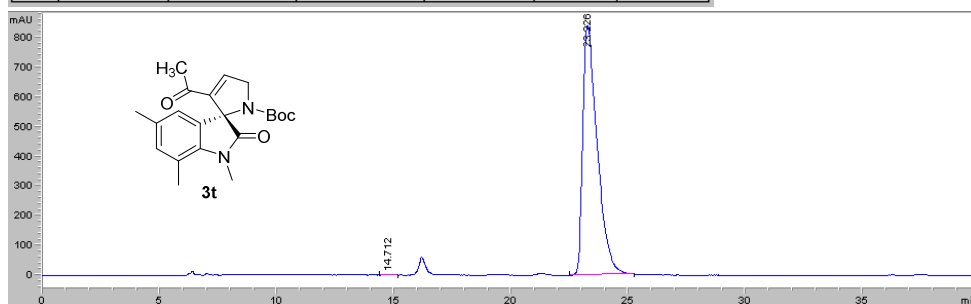

| # | Time   | Area    | Height | Width  | Area%  | Symmetry |
|---|--------|---------|--------|--------|--------|----------|
| 1 | 14.712 | 46.6    | 1.4    | 0.5742 | 0.130  | 0.603    |
| 2 | 23.226 | 35790.6 | 837.7  | 0.5924 | 99.870 | 0.434    |

#### IV. Elaboration of the [3+2]-adducts:

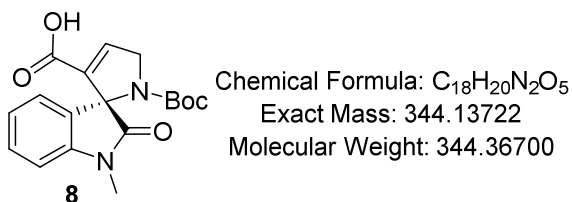

To a solution of the [3+2-adduct] **3g** (170 mg, 0.39 mmol) in methanol (3 mL) 10 wt% palladium on carbon (34 mg, 20 wt%) was added under argon atmosphere and then it was purged with hydrogen gas. Then the reaction was stirred under 1 atm H<sub>2</sub> pressure at room temperature for 12 h. After completion of the reaction based on TLC and LCMS analysis, it was concentrated under reduced pressure to give crude compound. The crude was purified by column chromatography over silica gel using 5-15% MeOH in DCM as eluent to give **8**. Yield: 111 mg (83%);  $[\alpha]_D^{20} = -37.4^\circ$  (*c* 0.9, CH<sub>3</sub>OH); IR  $\nu_{\max}/\text{cm}^{-1}$  3393, 2979, 2936, 2509, 1704; H NMR (4:1 rotamer ratio, asterisks denote minor rotamer peaks, 500 MHz, CD<sub>3</sub>OD):  $\delta$  7.24 (td, *J* = 7.7, 1.0 Hz, 1H), 7.20\* (td, *J* = 7.8, 1.2 Hz, 0.29H), 7.04 (d, *J* = 7.2 Hz, 1H), 7.02\* (d, *J* = 7.4 Hz, 0.26H), 6.99 – 6.90 (m, 2H), 6.96 – 6.90\* (m, 0.4H), 6.86 (d, *J* = 7.6 Hz, 1H), 6.85\* (d, *J* = 6.7 Hz, 0.2H), 4.45 (dd, *J* = 17.8, 1.9 Hz, 1H), 4.40 (dd, *J* = 17.7, 2.1 Hz, 1H), 3.15\* (s, 0.68H), 3.13 (s, 3H), 1.27\* (s, 2H), 0.97 (s, 9H); <sup>13</sup>C NMR (asterisks denote minor rotamer peaks, 126 MHz, CD<sub>3</sub>OD):  $\delta$  175.68, 175.57\*, 152.76, 152.14\*, 144.62\*, 144.55, 137.81, 129.71, 129.15, 129.08\*, 128.92\*, 122.61, 122.49\*, 122.21, 122.20\*, 108.28\*, 108.22, 80.74, 80.67\*, 73.09\*, 72.96, 53.85\*, 53.53, 27.16, 26.79\*, 26.75, 25.51\*, 25.49; HRMS [ESI]: Calculated for C<sub>18</sub>H<sub>21</sub>N<sub>2</sub>O<sub>5</sub> [M+H<sup>+</sup>]: 345.14450, found: 345.14474.

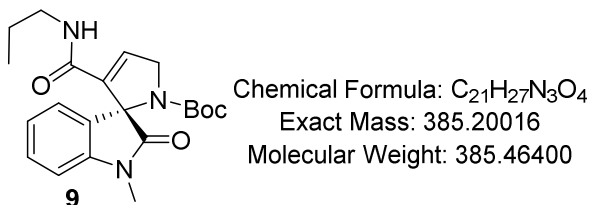

The solution of the acid **8** (50 mg, 0.145 mmol) and HBTU (110 mg, 0.290 mmol) in dry DMF (2 mL) was stirred for 10 min at rt. Then propylamine (13.0 mg, 0.22 mmol) was added followed by DIPEA (38 mg, 0.291 mmol) and was allowed to stir at rt overnight. LCMS was

used to monitor the reaction. Then the solvent was removed in vacuo to give crude. The crude was purified by column chromatography using 50-70% EtOAc in petroleum ether as eluent to afford pure compound **9**. Yield: 28 mg (50%);  $[\alpha]_D^{20} = -5.4^\circ$  (*c* 1.0, CH<sub>2</sub>Cl<sub>2</sub>); IR  $\nu_{\max}/\text{cm}^{-1}$  3348, 3058, 2964, 2929, 2873, 1783, 1715; <sup>1</sup>H NMR (4:1 rotamer ratio, asterisks denote minor rotamer peaks, 500 MHz, CDCl<sub>3</sub>)  $\delta$  7.24 (t, *J* = 7.6 Hz, 1H), 7.03\* (d, *J* = 8.0 Hz, 0.31H), 7.00 (d, *J* = 6.8 Hz, 1H), 6.95 (d, *J* = 7.4 Hz, 1H), 6.94\* (d, *J* = 7.4 Hz, 0.35H), 6.81\* (d, *J* = 7.8 Hz, 0.29H), 6.64\* (t, *J* = 2.0 Hz, 0.26H), 6.75 (d, *J* = 7.8 Hz, 1H), 6.60 (t, *J* = 2.1 Hz, 1H), 5.63 (t, *J* = 5.4 Hz, 1H), 5.43\* (t, *J* = 5.6 Hz, 0.23H), 4.54 (dd, *J* = 17.4, 2.2 Hz, 1H), 4.53\* (dd, *J* = 17.2, 2.2 Hz, 0.26H), 4.48 (dd, *J* = 17.4, 2.1 Hz, 1H), 4.39\* (dd, *J* = 17.2, 2.0 Hz, 0.25H), 3.24\* (s, 0.6H), 3.19 (s, 2H), 3.03 – 2.94 (m, 2H), 1.38 – 1.33\* (m, 0.7H), 1.34 – 1.26 (m, 2H), 1.18\* (s, 3H), 0.67\* (t, *J* = 7.4 Hz, 1H), 1.00 (s, 9H), 0.71 (t, *J* = 7.4 Hz, 3H); <sup>13</sup>C NMR (asterisks denote minor rotamer peaks, 126 MHz, CDCl<sub>3</sub>)  $\delta$  173.23, 173.20\*, 160.00, 151.40, 143.37, 143.16\*, 137.10, 136.69\*, 132.08\*, 130.72, 128.80\*, 128.58, 128.06, 121.78\*, 121.76\*, 121.63, 121.59, 107.60\*, 107.05, 79.73, 79.69\*, 72.22\*, 72.06, 52.92\*, 52.74, 40.01, 39.97\*, 30.90\*, 28.68, 28.64\*, 27.28, 26.77, 26.72\*, 26.66\*, 25.80\*, 25.52, 21.51, 21.42\*, 10.14, 10.09\*; HRMS [ESI]: Calculated for C<sub>21</sub>H<sub>28</sub>N<sub>3</sub>O<sub>4</sub> [M+H<sup>+</sup>]: 386.20743, found: 386.20767.

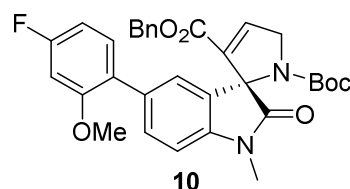

Chemical Formula: C<sub>32</sub>H<sub>31</sub>FN<sub>2</sub>O<sub>6</sub>  
 Exact Mass: 558.21661  
 Molecular Weight: 558.60640

To a solution of the [3+2-adduct] **3j** (14 mg, 0.027 mmol), 4-Fluoro-2-methoxyphenylboronic acid (5.6 mg, 0.033 mmol), K<sub>2</sub>CO<sub>3</sub> (11.3 mg, 0.082 mmol) in DMF/H<sub>2</sub>O (4:1, 0.5 mL) was added Pd(PPh<sub>3</sub>)<sub>4</sub> (3.1 mg, 0.003 mmol) and argon was bubbled through the mixture for 2 min. The mixture was stirred at 80 °C (LC-MS control) for 4h and then it was cooled to room temperature. Diluted with water (5 mL), extracted with ether (3 x 15 mL). The combined ether layer was washed with water, dried over anhydrous sodium sulfate and concentrated under reduced pressure to give the crude. Purification of the crude material over silica gel column chromatography using 5-15% EtOAc in pet.ether afforded pure compound **10**. Yield: 8.4 mg (55%);  $[\alpha]_D^{20} = -74.2^\circ$  (*c* 0.42, CH<sub>2</sub>Cl<sub>2</sub>); IR  $\nu_{\max}/\text{cm}^{-1}$  3067, 2977, 2934, 1789, 1727, 1704; <sup>1</sup>H NMR (5:1 rotamer ratio, asterisks denote minor rotamer

peaks, 600 MHz, CDCl<sub>3</sub>)  $\delta$  7.37\* (dd,  $J = 8.1, 1.7$  Hz, 0.2H), 7.35 (dd,  $J = 8.0, 1.7$  Hz, 1H), 7.28 – 7.24\* (m, 0.6H), 7.24 – 7.20 (m, 3H), 7.16 (d,  $J = 1.6$  Hz, 1H), 7.15 (t,  $J = 2.1$  Hz, 1H), 7.10\* (t,  $J = 2.0$  Hz, 0.2H), 7.05 – 7.00\* (m, 0.4H), 6.99 (dd,  $J = 7.1, 2.1$  Hz, 2H), 6.96 – 6.93\* (m, 0.4H), 6.92 – 6.86 (m, 2H), 6.84 – 6.78 (m, 1H), 6.62\* (d,  $J = 8.1$  Hz, 0.2H), 6.59 (d,  $J = 8.0$  Hz, 1H), 4.912 (d,  $J = 12.2$  Hz, 1H), 4.91\* (d,  $J = 11.9$  Hz, 0.2H), 4.82 (d,  $J = 12.2$  Hz, 1H), 4.79\* (d,  $J = 12.4$  Hz, 0.2H), 4.57 (dd,  $J = 18.7, 2.0$  Hz, 1H), 4.56\* (dd,  $J = 17.0, 2.0$  Hz, 0.2H), 4.53 (dd,  $J = 18.7, 2.2$  Hz, 1H), 4.44\* (dd,  $J = 18.3, 2.1$  Hz, 0.2H), 3.63 (s, 3H), 3.61\* (s, 0.6H), 2.96\* (s, 0.6H), 2.92 (s, 3H), 1.30\* (s, 1.8H), 1.01\* (s, 9H); <sup>13</sup>C NMR (asterisks denote minor rotamer peaks, 151 MHz, CDCl<sub>3</sub>)  $\delta$  174.04, 173.95\*, 160.83\*, 160.73, 158.07\*, 157.94, 156.49\*, 156.36, 152.70\*, 152.64, 152.63, 152.33, 151.64\*, 143.81\*, 143.72, 141.03\*, 140.89, 134.80, 134.32\*, 134.19, 134.11\*, 132.14 (d,  $J = 1.1$  Hz), 132.07\* (d,  $J = 7.6$  Hz), 131.69\*, 131.60 (d,  $J = 7.5$  Hz), 131.36\*, 130.62\*, 130.38, 128.86, 128.71\* (d,  $J = 1.9$  Hz), 128.51 (d,  $J = 8.8$  Hz), 128.51, 128.40, 128.37\*, 128.35\*, 128.13\*, 127.90\*, 123.95, 123.67\*, 117.05\* (d,  $J = 23.2$  Hz), 117.01 (d,  $J = 23.3$  Hz), 114.19 (d,  $J = 22.6$  Hz), 113.96\* (d,  $J = 22.6$  Hz), 113.15\* (d,  $J = 8.5$  Hz), 112.58 (d,  $J = 8.4$  Hz), 108.07\*, 107.61, 80.83, 80.75\*, 72.64\*, 72.42, 66.89, 66.87\*, 56.49\*, 56.20, 54.12\*, 53.83, 28.34, 27.76, 27.48\*, 26.47\*, 26.19; <sup>19</sup>F NMR (565 MHz, CDCl<sub>3</sub>)  $\delta$  -123.84; HRMS [ESI]: Calculated for C<sub>32</sub>H<sub>31</sub>FN<sub>2</sub>O<sub>6</sub> [M+H<sup>+</sup>]: 559.22389, found: 559.22392.

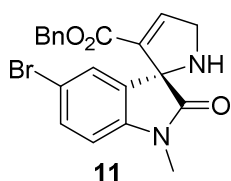

Chemical Formula: C<sub>20</sub>H<sub>17</sub>BrN<sub>2</sub>O<sub>3</sub>  
 Exact Mass: 412.04226  
 Molecular Weight: 413.27100

To a solution of the [3+2-adduct] **3j** (30 mg, 0.058 mmol) in DCM (2 mL), TFA (2mL) was added at 0 °C and then it was allowed to stir at rt. After 6 h, TLC analysis showed complete conversion. It was quenched with 1 M NaOH solution (5 mL) and extracted with DCM (2 x 10 mL), washed with water (5 mL), dried over anhydrous sodium sulfate and concentrated to give crude which was purified by filter column using 2-5% MeOH in DCM to give the compound **11**. Yield: 24 mg (99%);  $[\alpha]_D^{20} = -4.5^\circ$  (c 0.95, CH<sub>2</sub>Cl<sub>2</sub>); IR  $\nu_{\max}/\text{cm}^{-1}$  3289, 3072, 3064, 3056, 2931, 1723; <sup>1</sup>H NMR (500 MHz, CD<sub>2</sub>Cl<sub>2</sub>)  $\delta$  7.33 (dd,  $J = 8.2, 2.0$  Hz, 1H), 7.25 – 7.21 (m, 4H), 7.20 (d,  $J = 1.9$  Hz, 1H), 6.99 – 6.95 (m, 2H), 6.49 (d,  $J = 8.3$  Hz, 1H), 4.83 (dd,  $J = 34.1, 12.2$  Hz, 2H), 4.14 (dd,  $J = 18.0, 2.0$  Hz, 1H), 4.09 (dd,  $J = 18.0, 1.9$  Hz, 1H), 2.83 (s, 3H), 2.13 (bs, 1H); <sup>13</sup>C NMR (126 MHz, CD<sub>2</sub>Cl<sub>2</sub>)  $\delta$  176.28, 161.43, 146.22, 143.02,

135.19, 135.03, 133.74, 131.99, 128.48, 128.29, 128.28, 126.64, 115.03, 109.80, 73.67, 66.61, 54.28, 26.06; HRMS [ESI]: Calculated for C<sub>20</sub>H<sub>18</sub>BrN<sub>2</sub>O<sub>3</sub> [M+H<sup>+</sup>]: 413.04953, found: 413.04980; Calculated for C<sub>20</sub>H<sub>18</sub><sup>81</sup>BrN<sub>2</sub>O<sub>3</sub> [M+H<sup>+</sup>]: 415.04748, found: 415.04758.

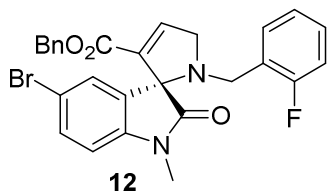

Chemical Formula: C<sub>27</sub>H<sub>22</sub>BrFN<sub>2</sub>O<sub>3</sub>  
Exact Mass: 520.07978  
Molecular Weight: 521.38640

To a solution of compound **11** (12 mg, 0.029 mmol) in dry 1,2-DCE (1 mL) 2-fluorobenzaldehyde (4.3 mg, 0.035 mmol) was added at rt and stirred for 10 min. To this sodium triacetoxyborohydride (14 mg, 0.064 mmol) was added portionwise and continued to stir at rt for 6 h. Saturated sodium bicarbonate solution (10 mL) was added and extracted with DCM (3 x 10 mL). The combined organic layer was washed with water, dried over anhydrous sodium sulfate and concentrated to give the crude. Purification of the crude over silica gel column chromatography using 5-15% EtOAc in petroleum ether afforded pure compound **12**. Yield: 13 mg (86%);  $[\alpha]_D^{20} = -40.1^\circ$  (*c* 1.26, CH<sub>2</sub>Cl<sub>2</sub>); IR  $\nu_{\max}/\text{cm}^{-1}$  3065, 3057, 2928, 1717; <sup>1</sup>H NMR (500 MHz, CD<sub>2</sub>Cl<sub>2</sub>)  $\delta$  7.30 (dd, *J* = 8.2, 2.0 Hz, 1H), 7.26 (d, *J* = 2.0 Hz, 1H), 7.23 (dd, *J* = 6.7, 3.5 Hz, 3H), 7.18 (t, *J* = 2.0 Hz, 1H), 7.13 – 7.04 (m, 2H), 6.99 – 6.95 (m, 2H), 6.93 (t, *J* = 7.5 Hz, 1H), 6.81 (t, *J* = 7.4 Hz, 1H), 6.40 (d, *J* = 8.2 Hz, 1H), 4.86 (d, *J* = 12.2 Hz, 1H), 4.78 (d, *J* = 12.2 Hz, 1H), 3.92 (dd, *J* = 16.7, 2.0 Hz, 1H), 3.83 (dd, *J* = 16.7, 2.2 Hz, 1H), 3.63 (d, *J* = 13.5 Hz, 1H), 3.46 (d, *J* = 13.5 Hz, 1H), 2.76 (s, 3H); <sup>13</sup>C NMR (126 MHz, CD<sub>2</sub>Cl<sub>2</sub>)  $\delta$  174.37, 162.04, 161.41, 160.07, 144.55, 143.65, 135.40, 135.20, 132.05, 130.98, 130.94, 130.84, 129.06, 128.99, 128.46, 128.25, 127.63, 124.81, 124.70, 123.75, 123.72, 115.00, 114.94, 114.83, 109.60, 76.29, 66.52, 58.45, 46.30, 46.28, 25.77; HRMS [ESI]: Calculated for C<sub>27</sub>H<sub>23</sub>BrFN<sub>2</sub>O<sub>3</sub> [M+H<sup>+</sup>]: 521.08706, found: 521.08750; Calculated for C<sub>27</sub>H<sub>23</sub><sup>81</sup>BrFN<sub>2</sub>O<sub>3</sub> [M+H<sup>+</sup>]: 523.08501, found: 523.08544.

## V. References:

1. (a) L. Rout and A. M. Harned, *Chem. Eur. J.* **2009**, *15*, 12926 – 12928; (b) Y. H. Paik and P. Dowd, *J. Org. Chem.*, **1986**, *51*, 2910-2913; (c) Z. Hamlet and W. D. Barker, *Synthesis*, **1970**, 543-544.
2. T. Constantieux and G. Buono, *Org. Synth.*, **2002**, *78*, 135.
3. H. Xiao, Z. Chai, C.-W. Zheng, Y.-Q. Yang, W. Liu, J.-K. Zhang, G. Zhao, *Angew. Chem., Int. Ed.*, **2010**, *49*, 4467-4470.
4. (a) W. Yan, D. Wang, J. Feng, P. Li, D. Zhao and R. Wang, *Org. Lett.*, **2012**, *14*, 2512–2515; (b) M. G. Sankar, M. G. Castro, Y. Wang and K. Kumar, *Asian J. Org. Chem.* **2013**, *2*, 646 – 649; (c) M. Holmquist, G. Blay and J. R. Pedro, *Chem. Commun.* **2014**, *50*, 9309 – 9312.

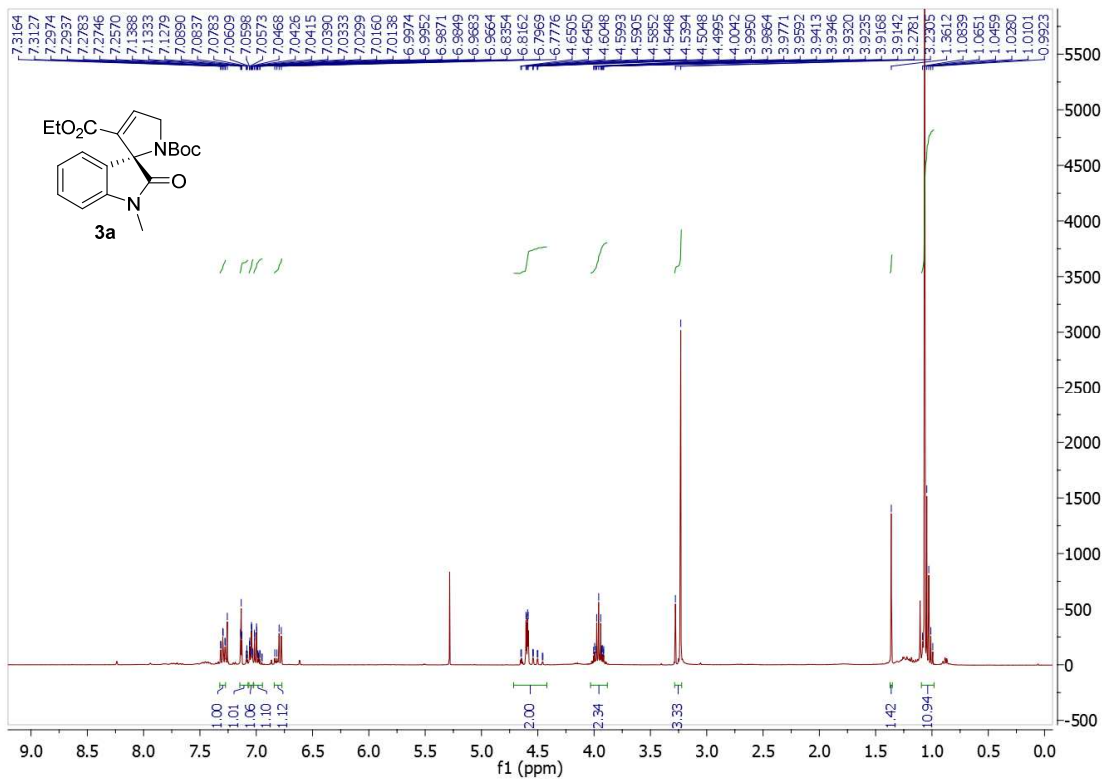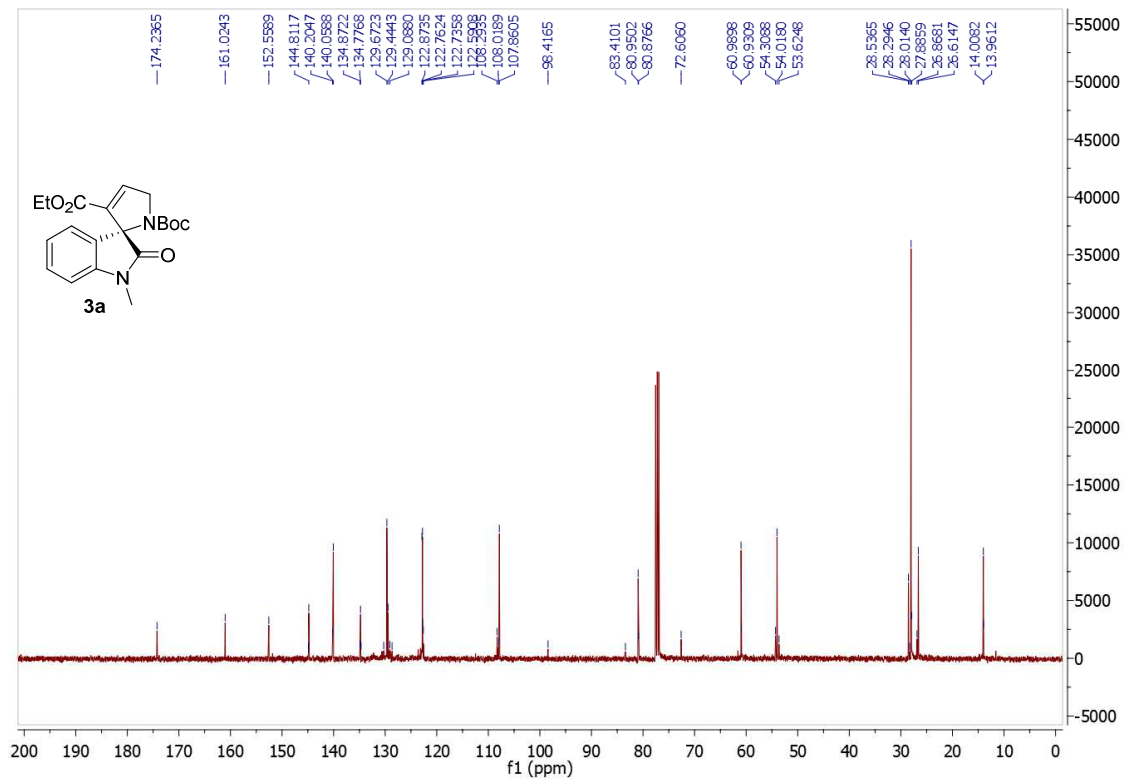



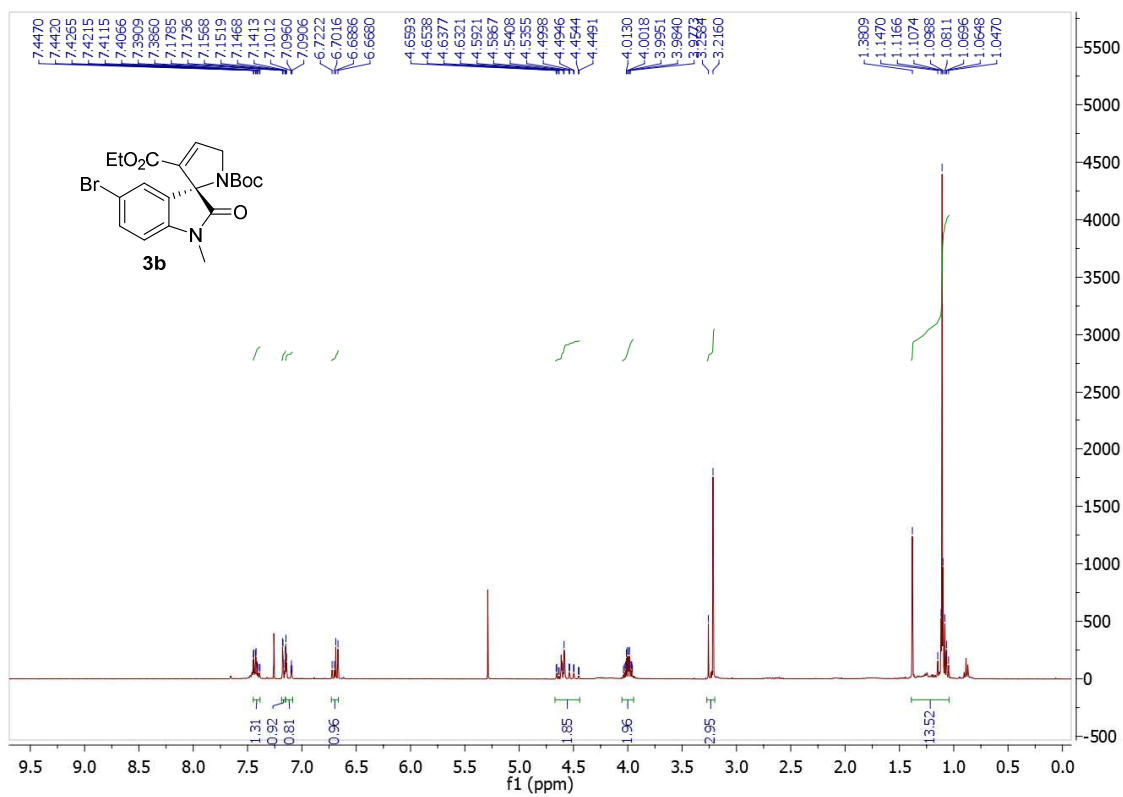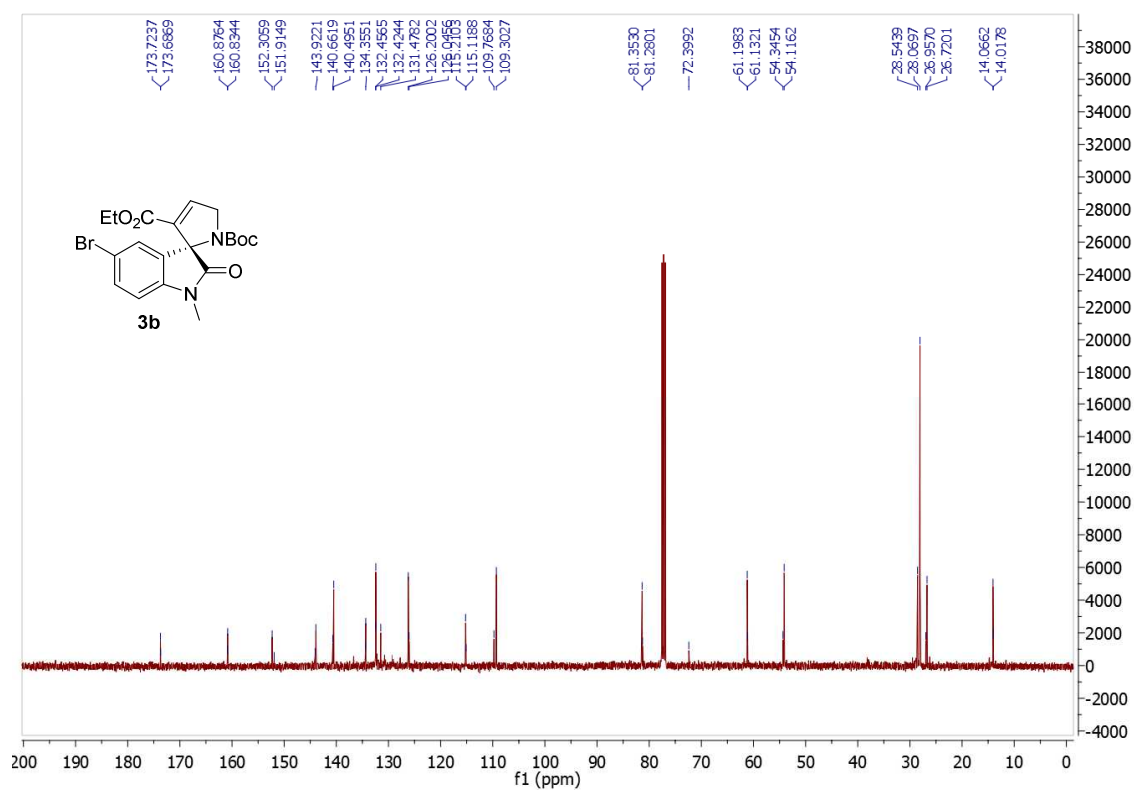

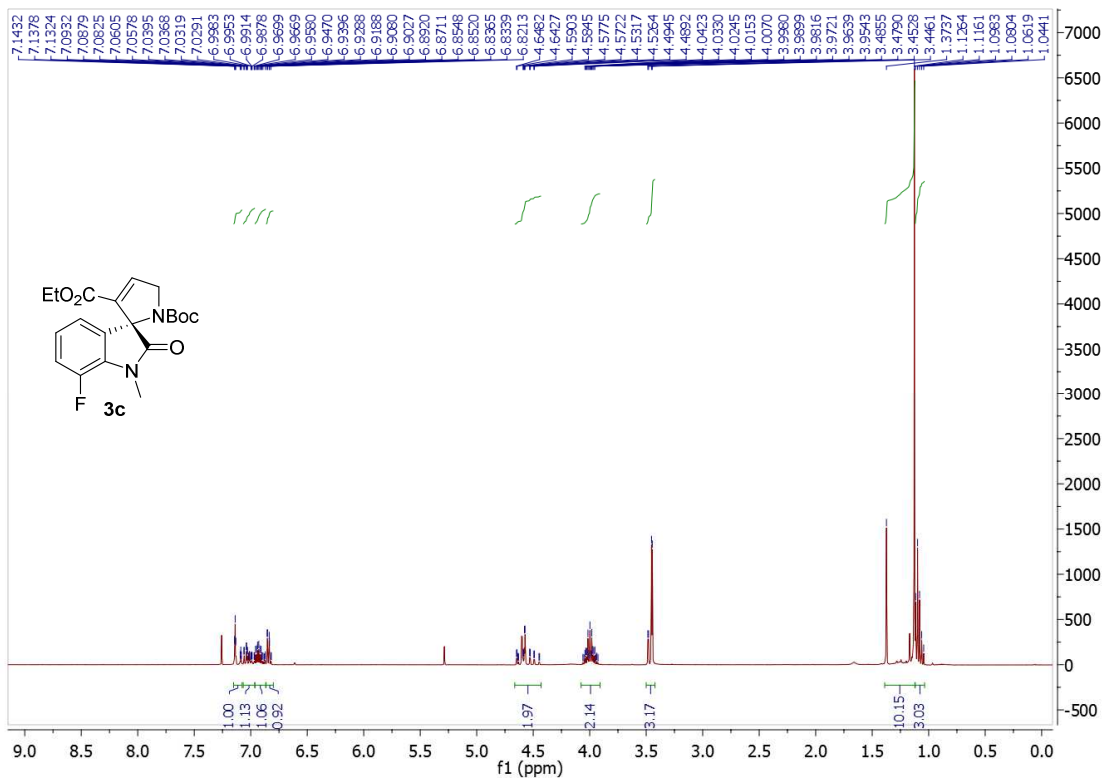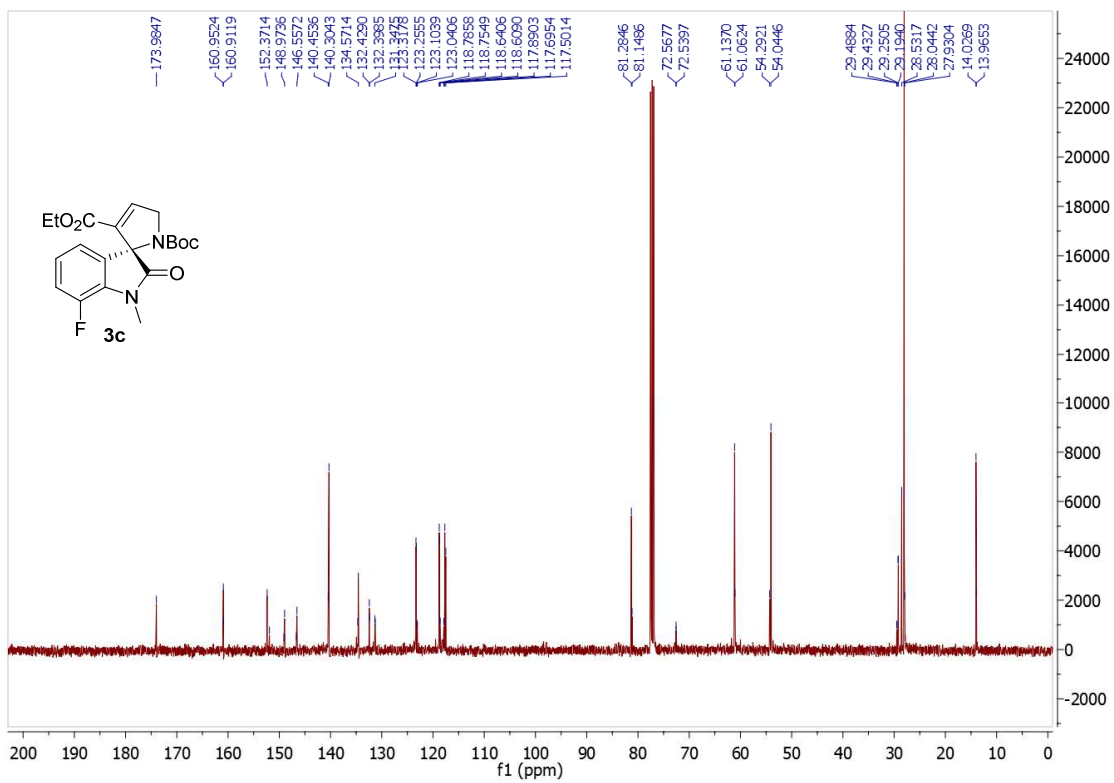

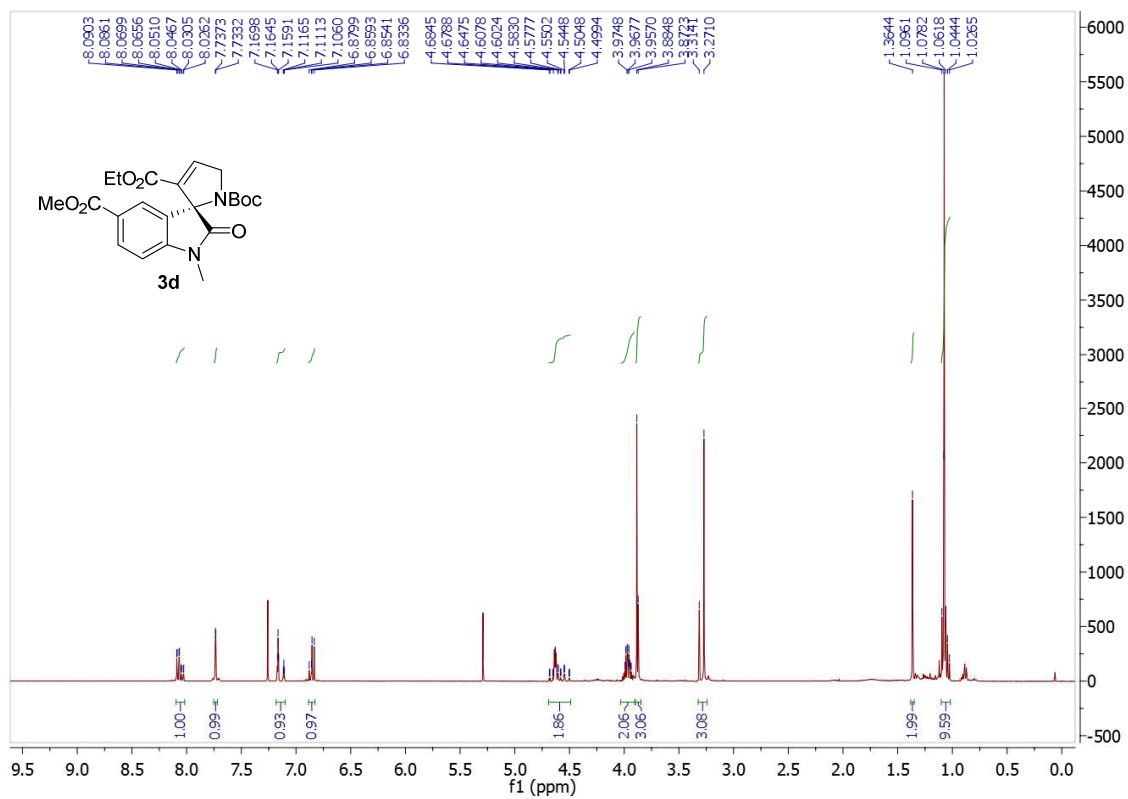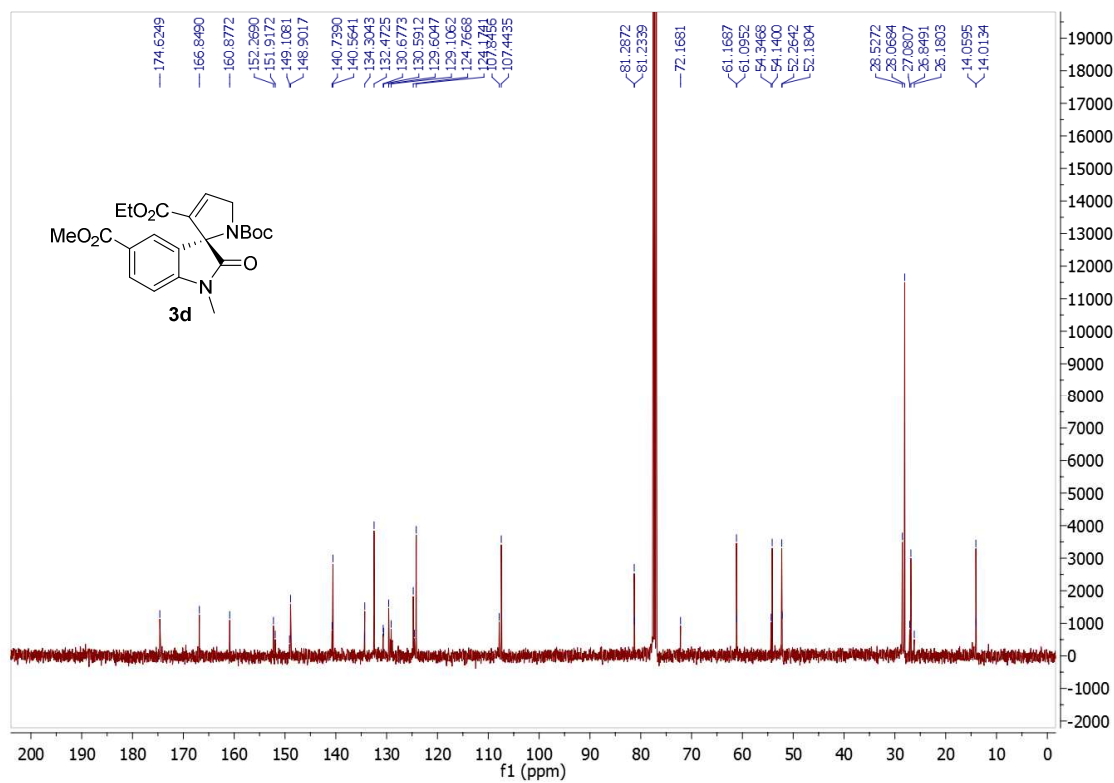

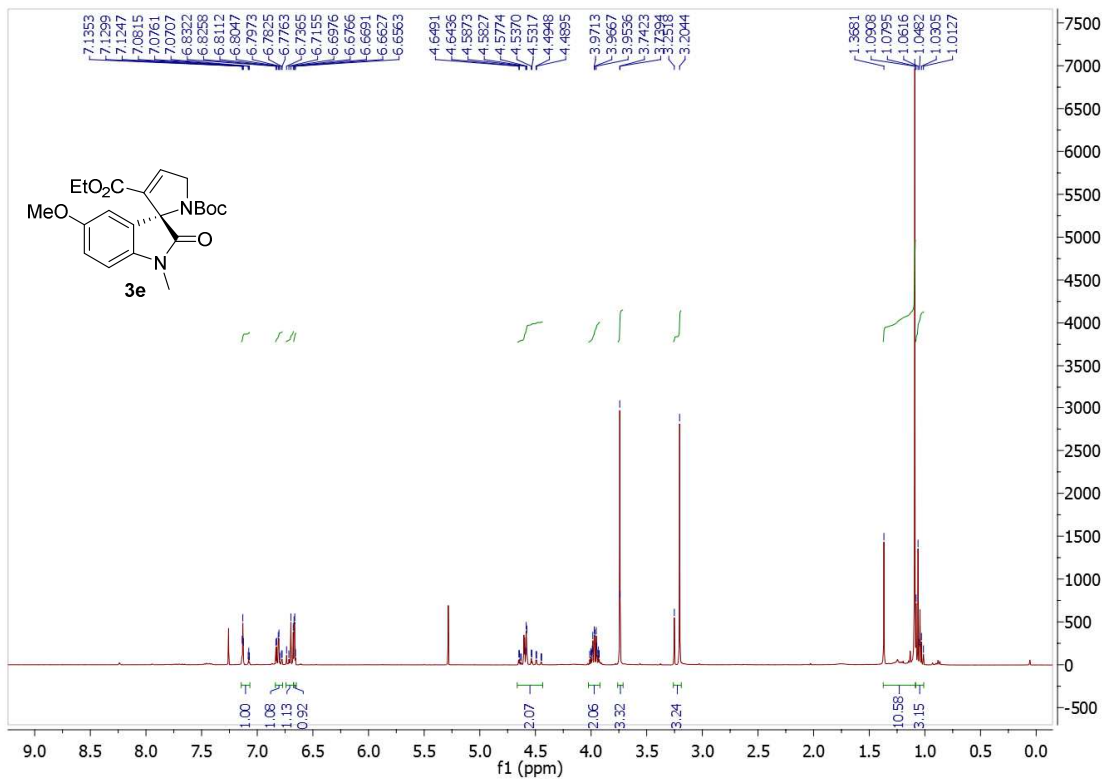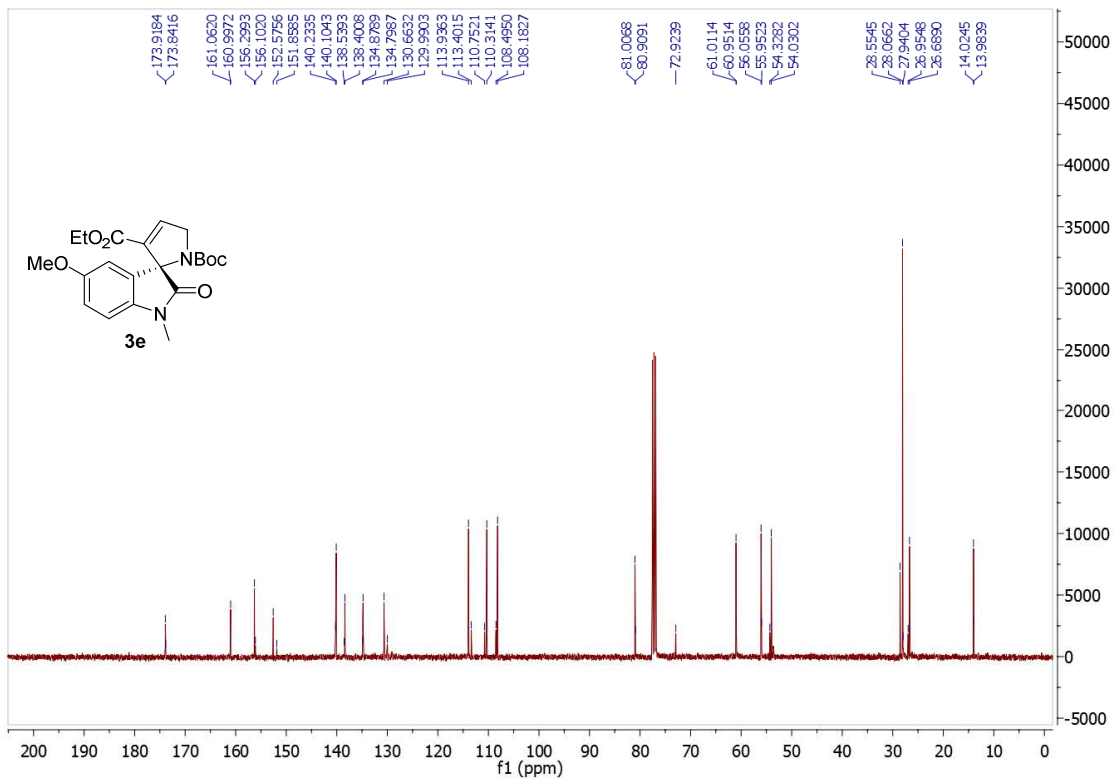

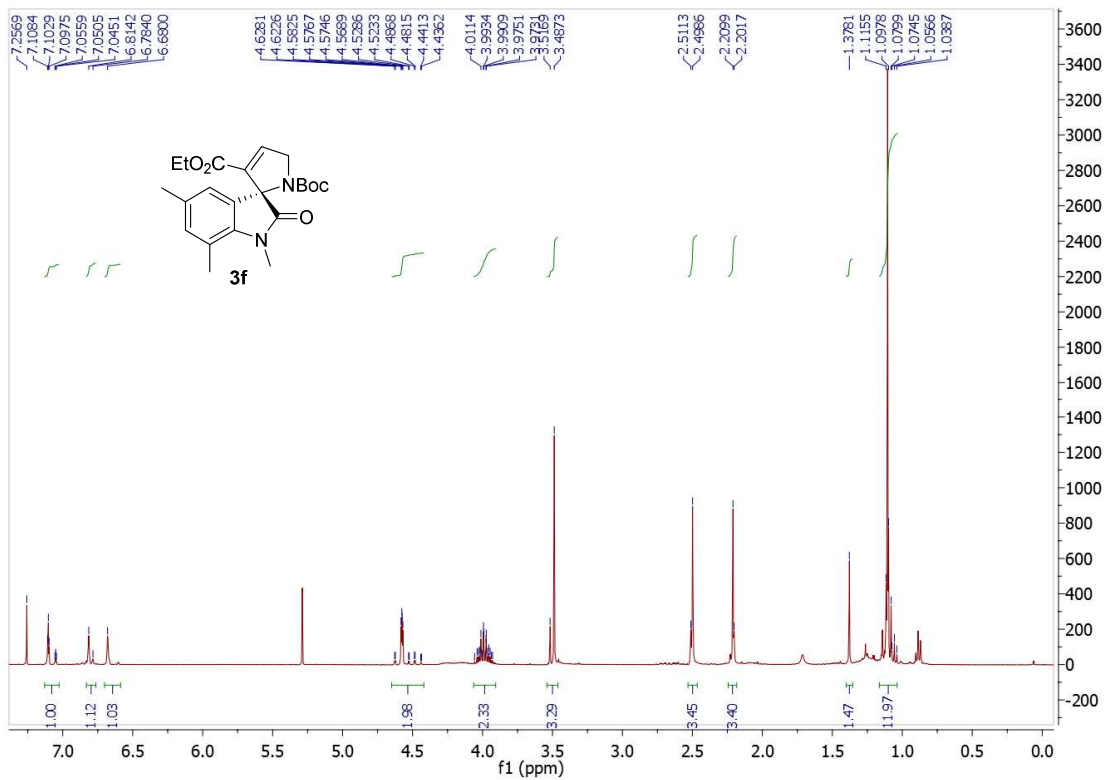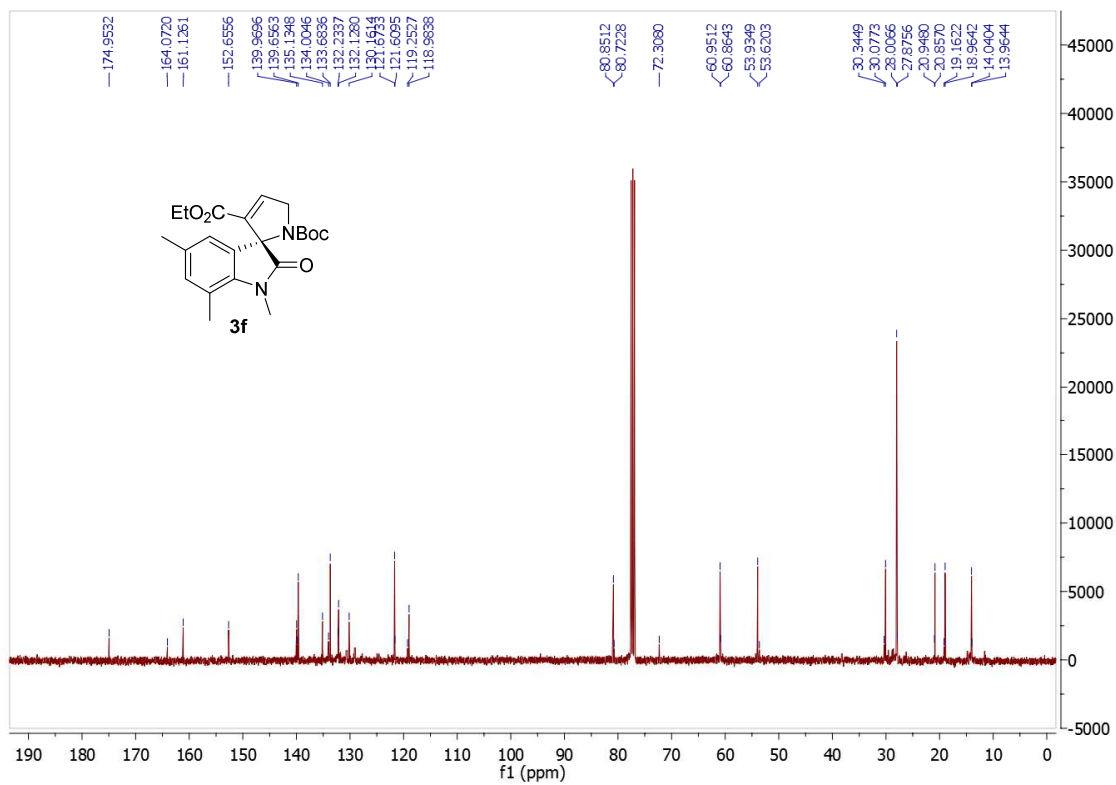

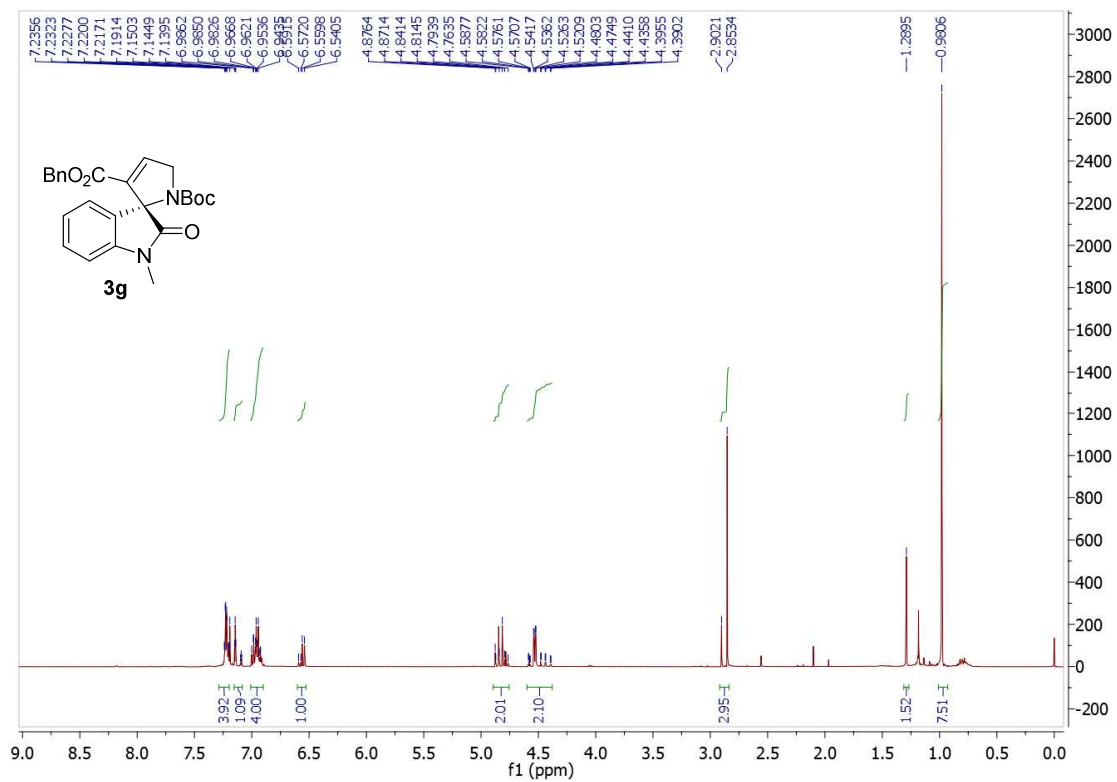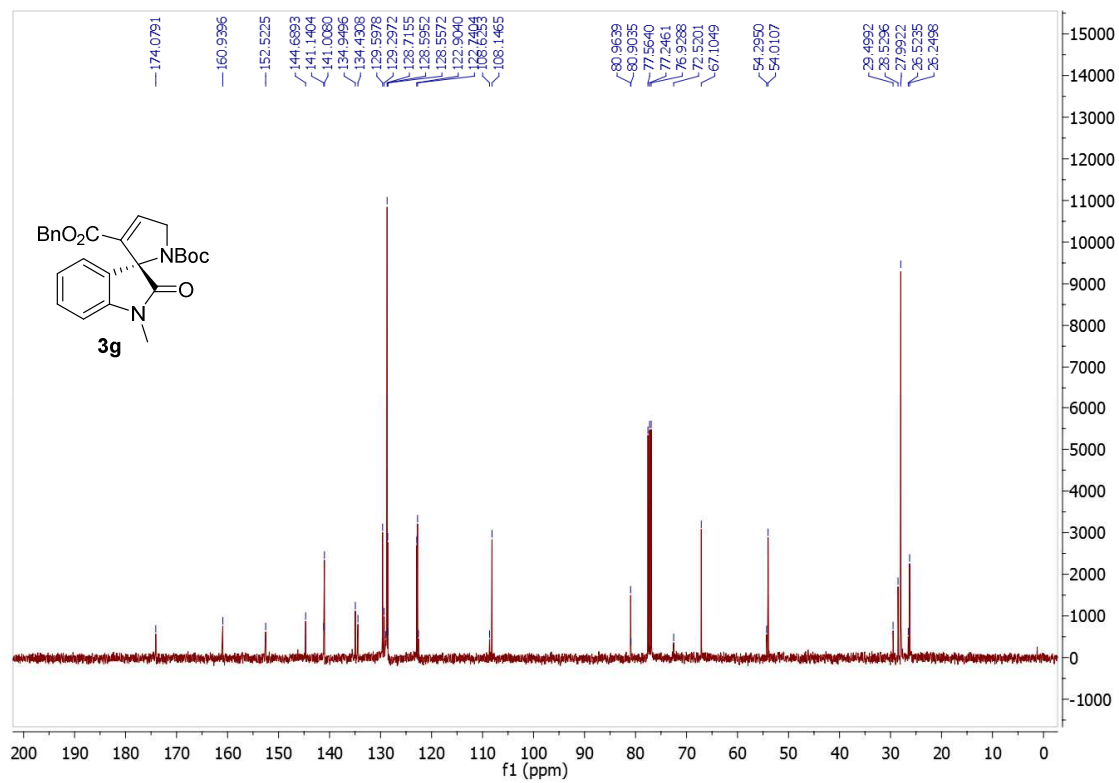

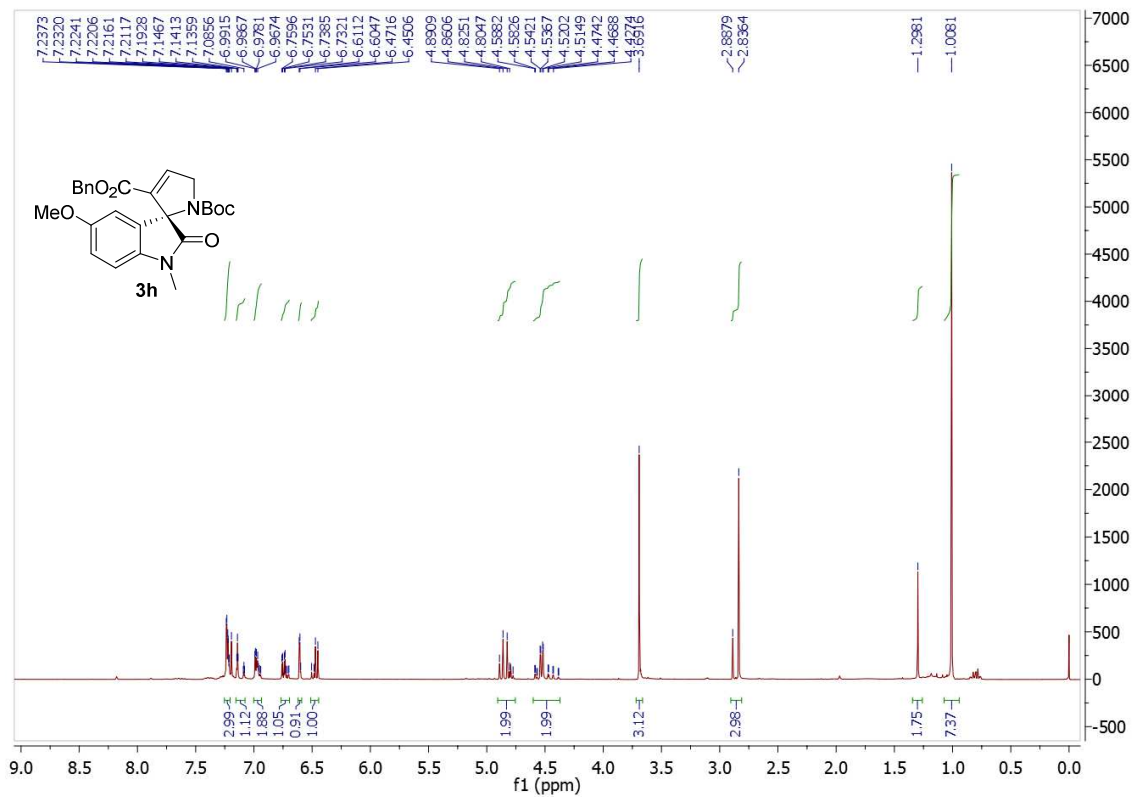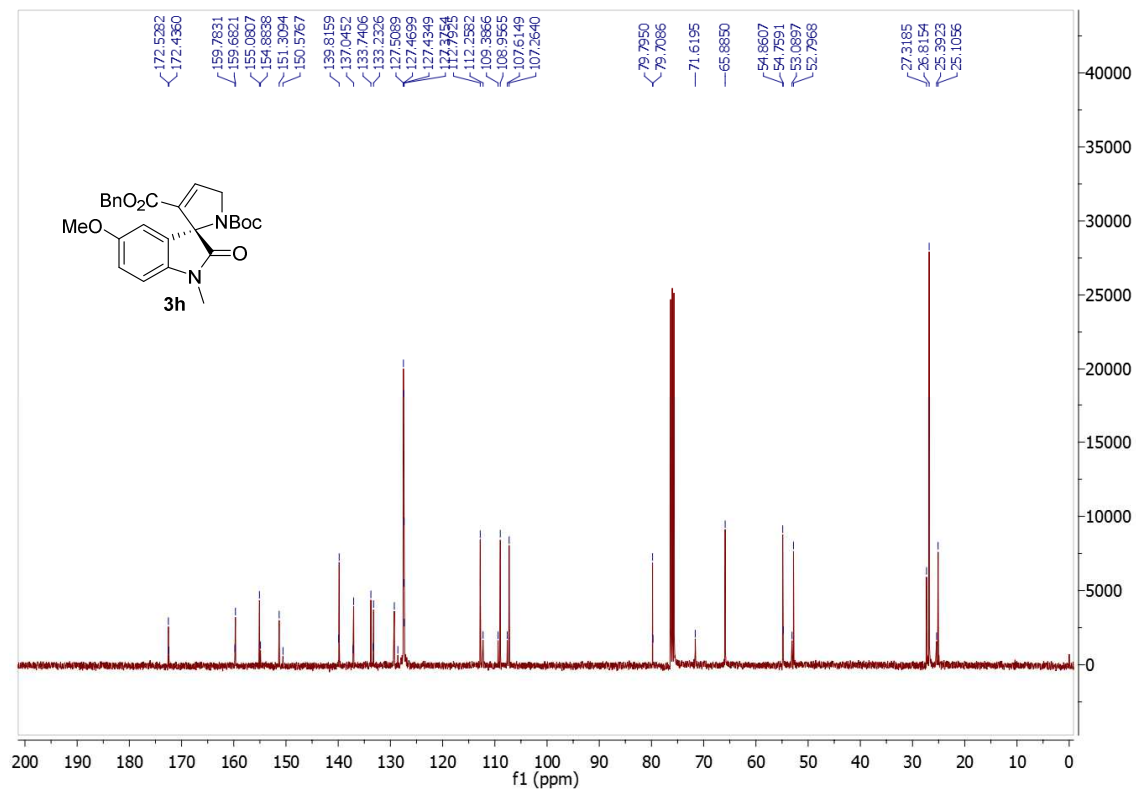

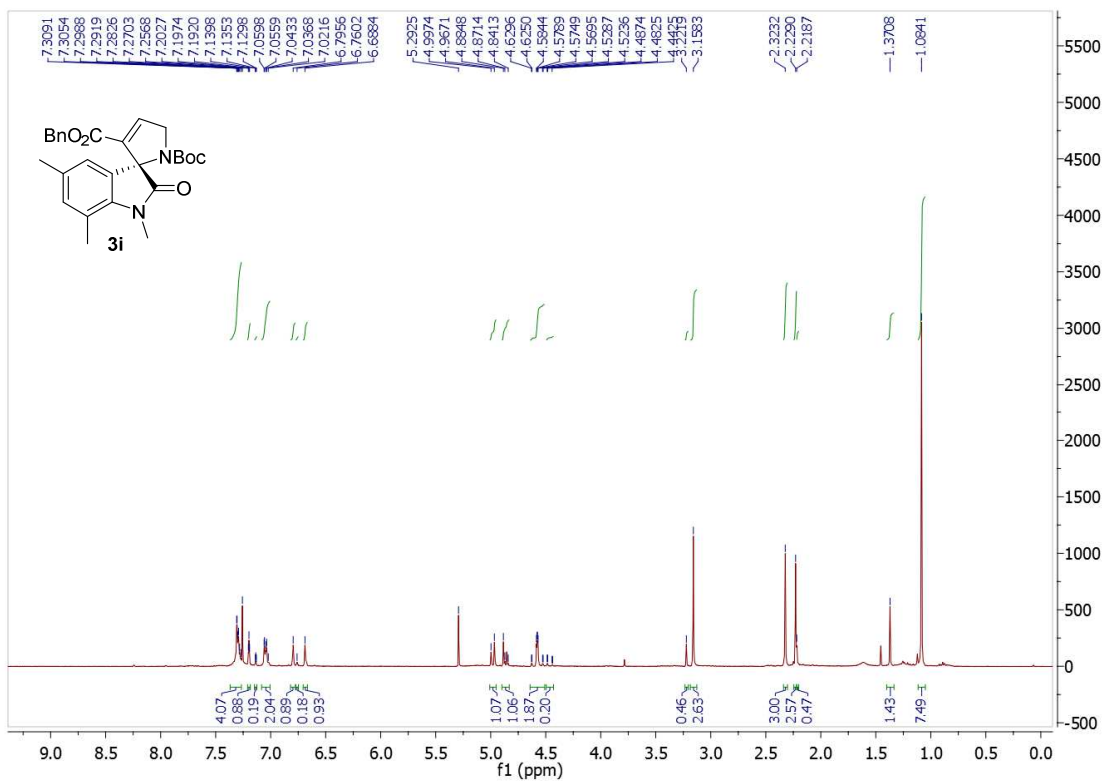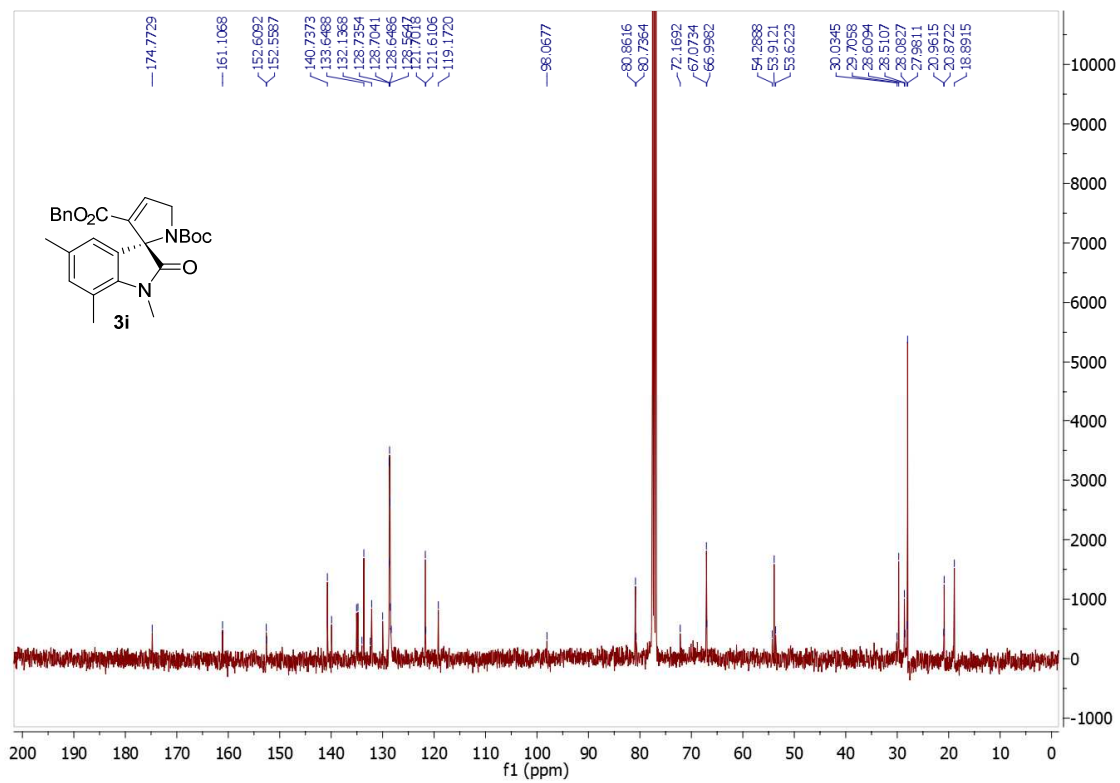



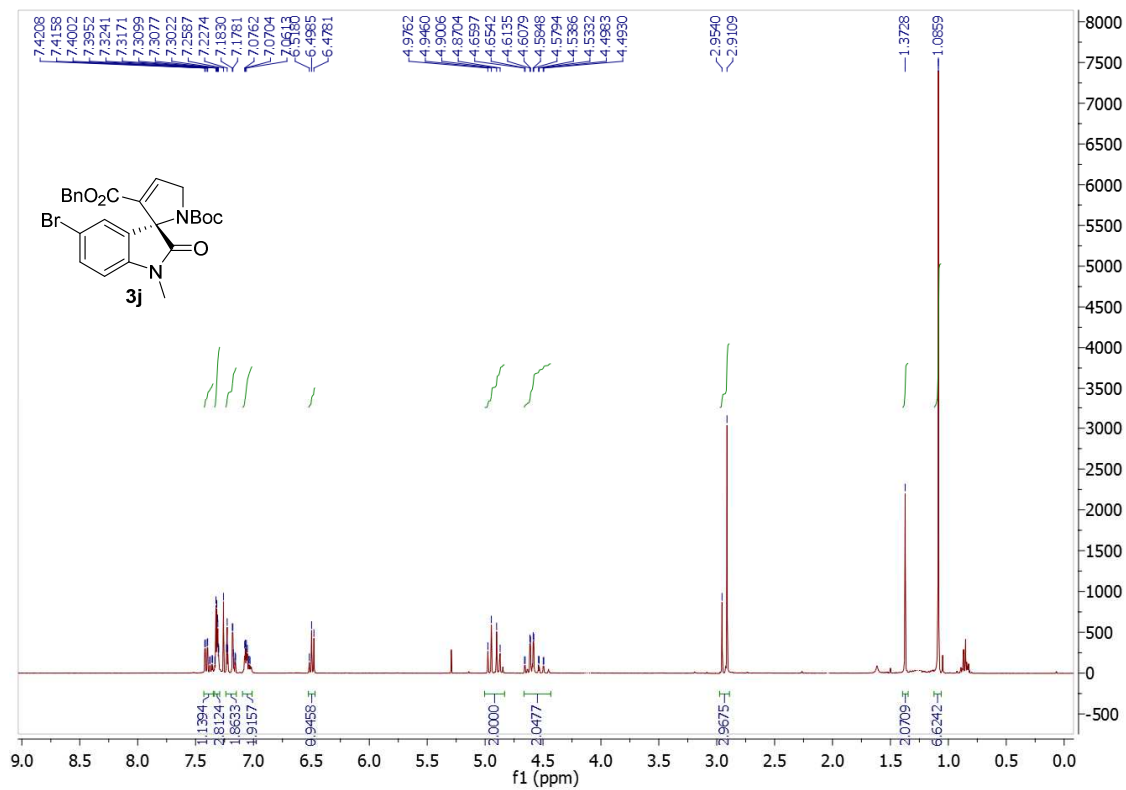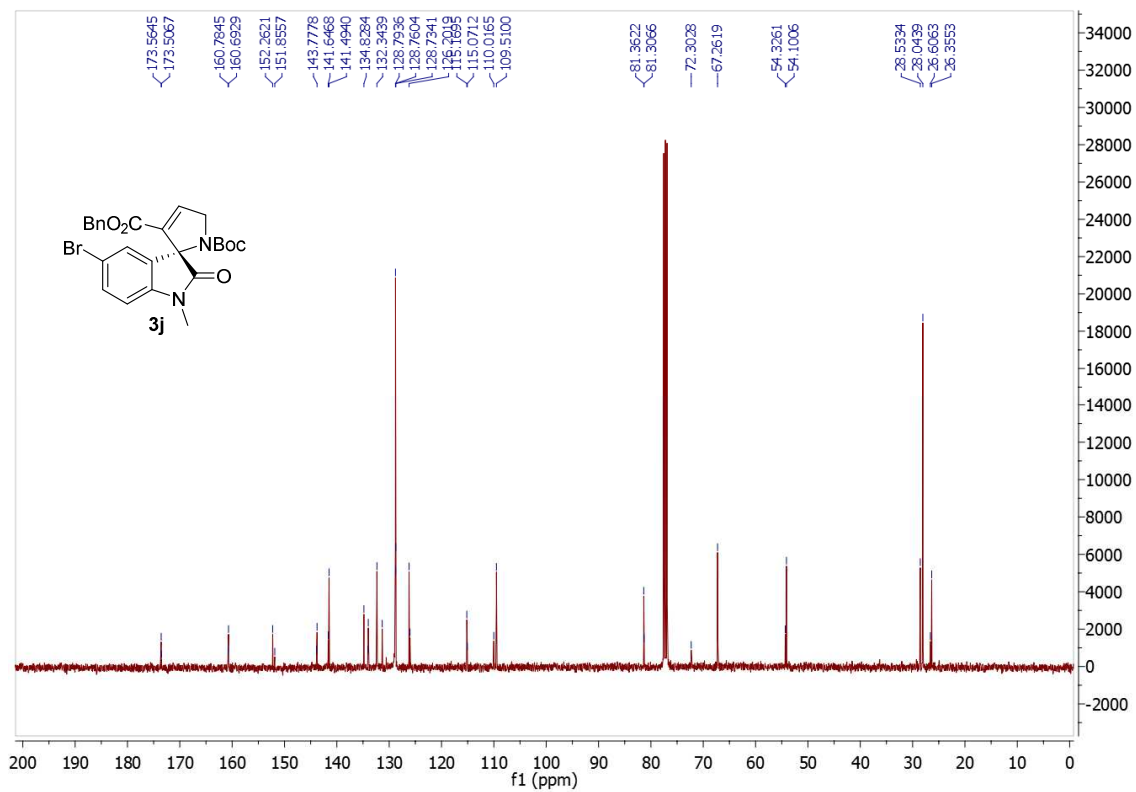

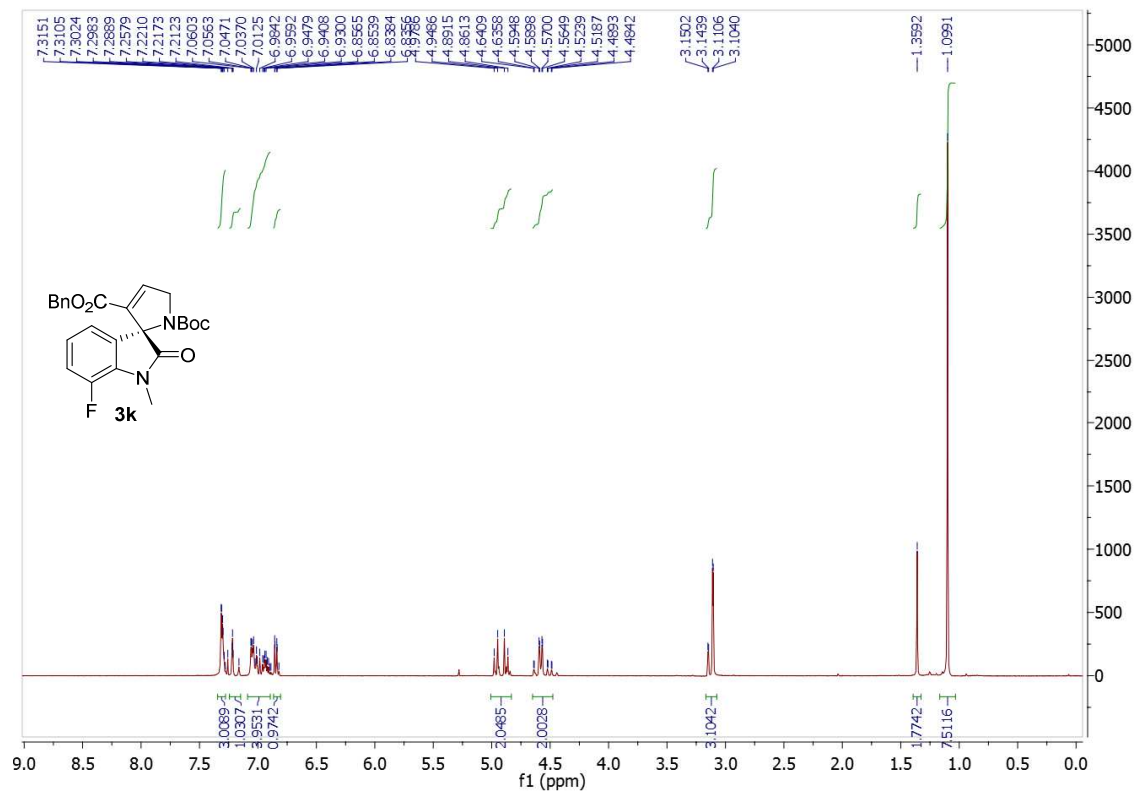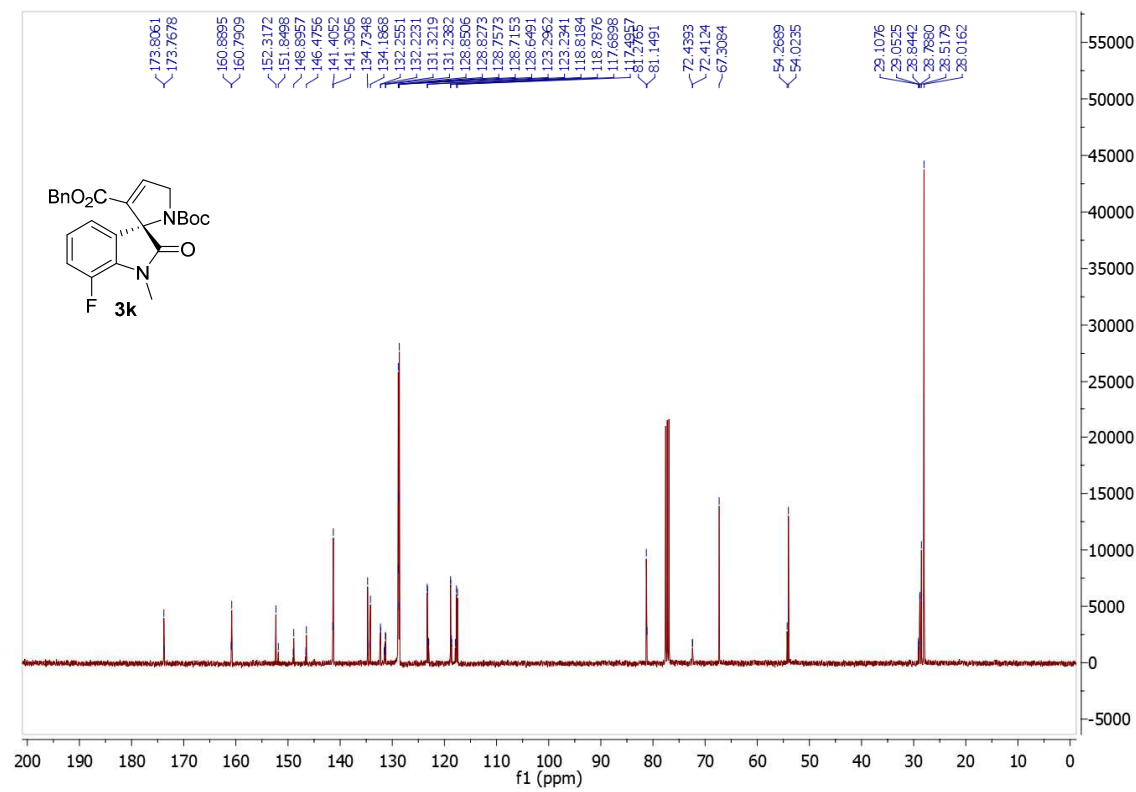

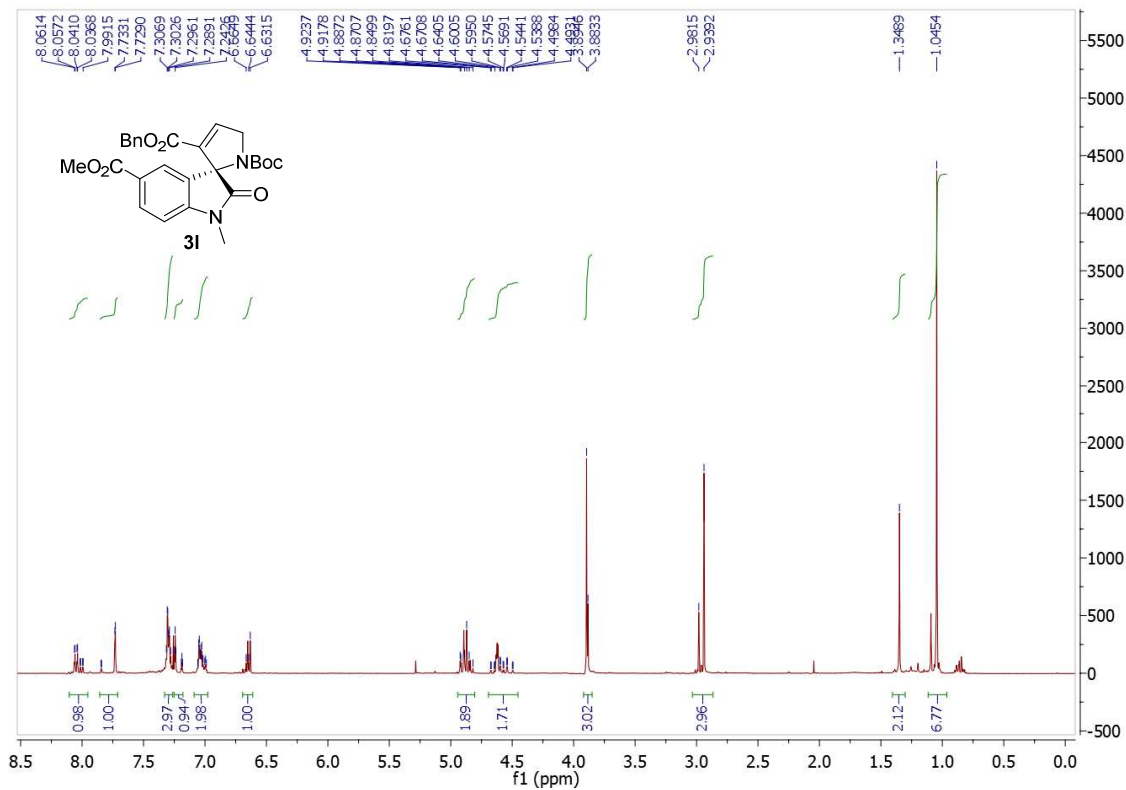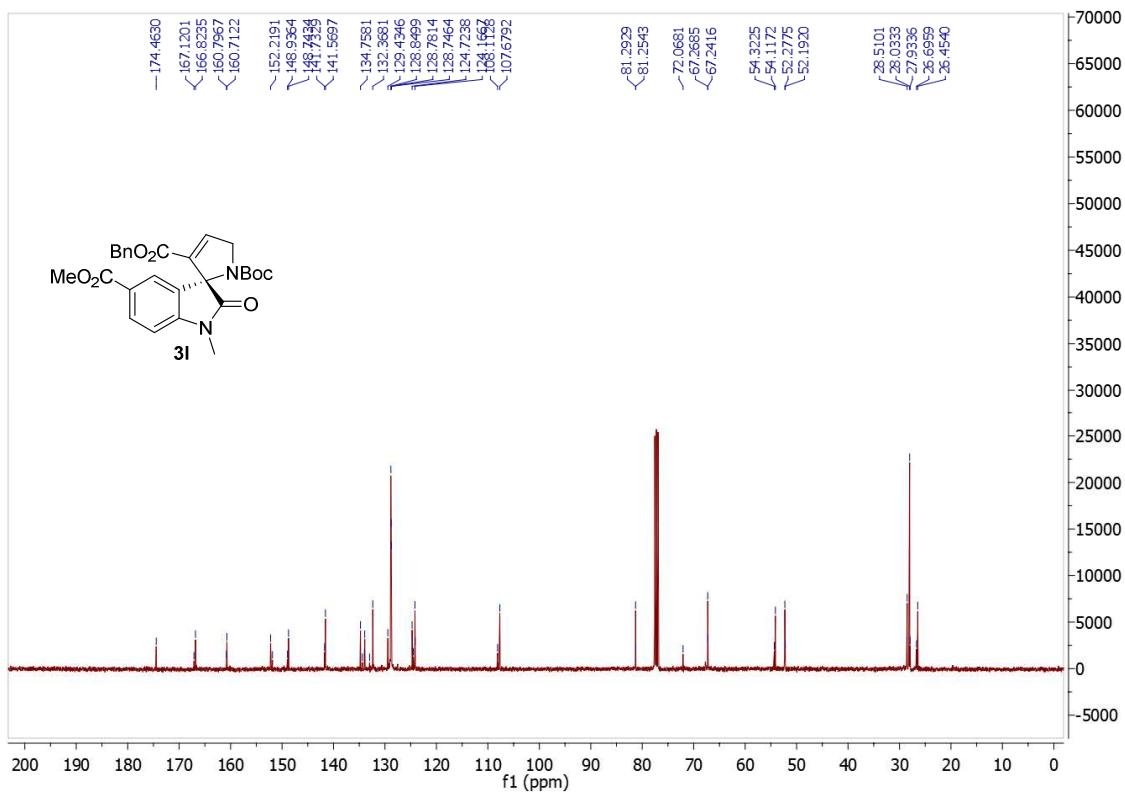

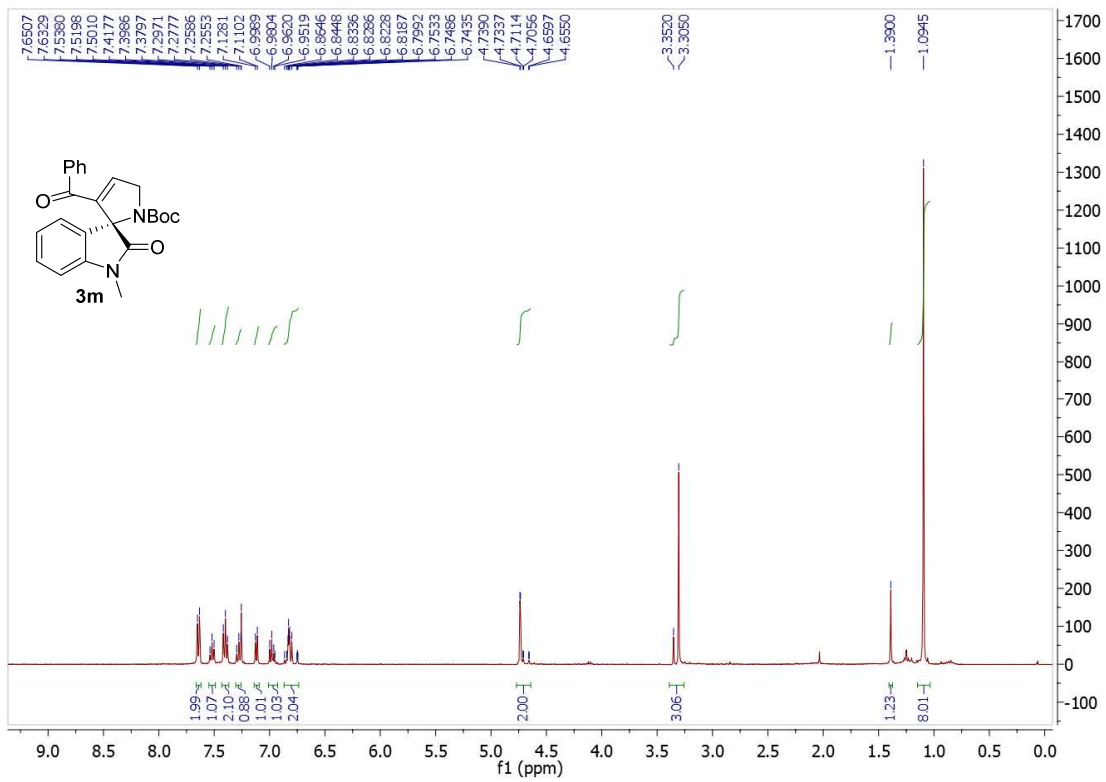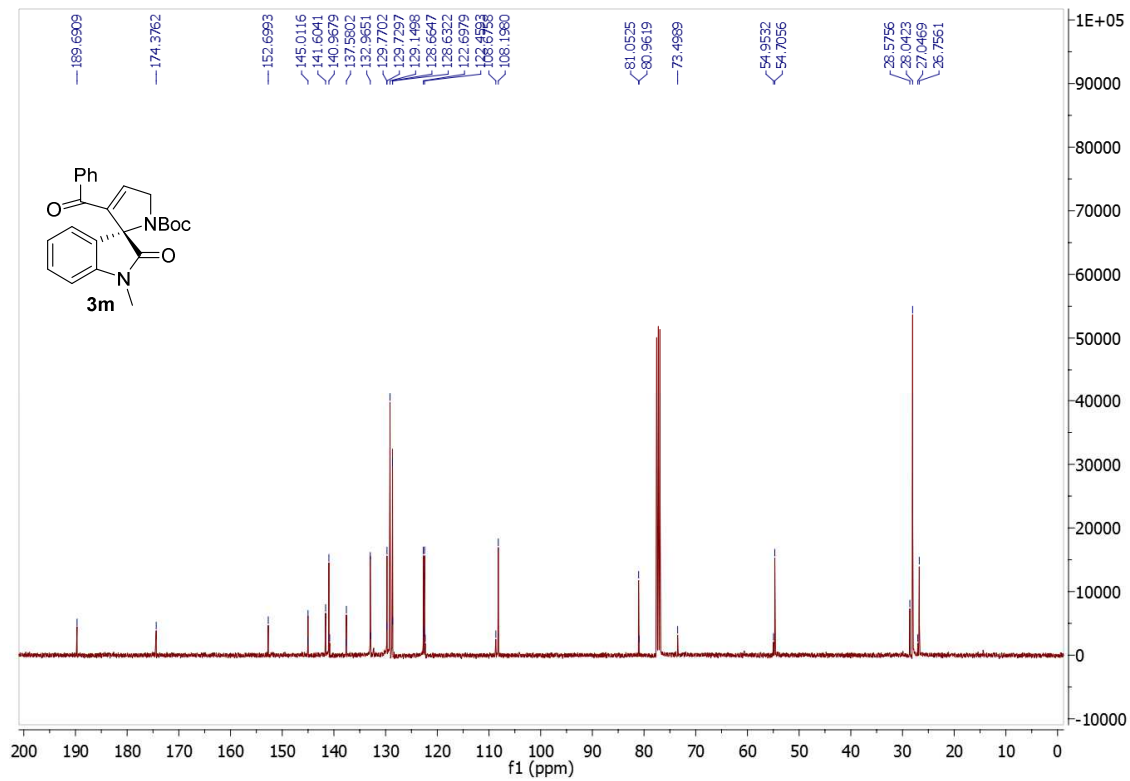

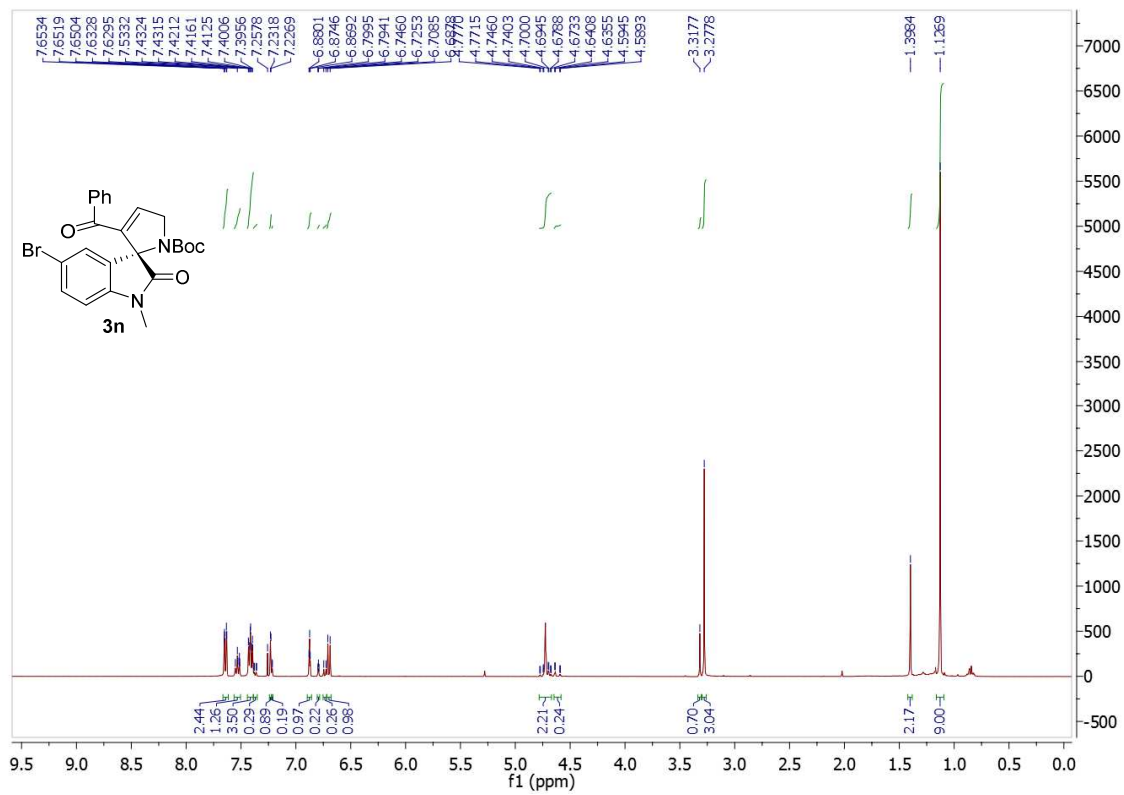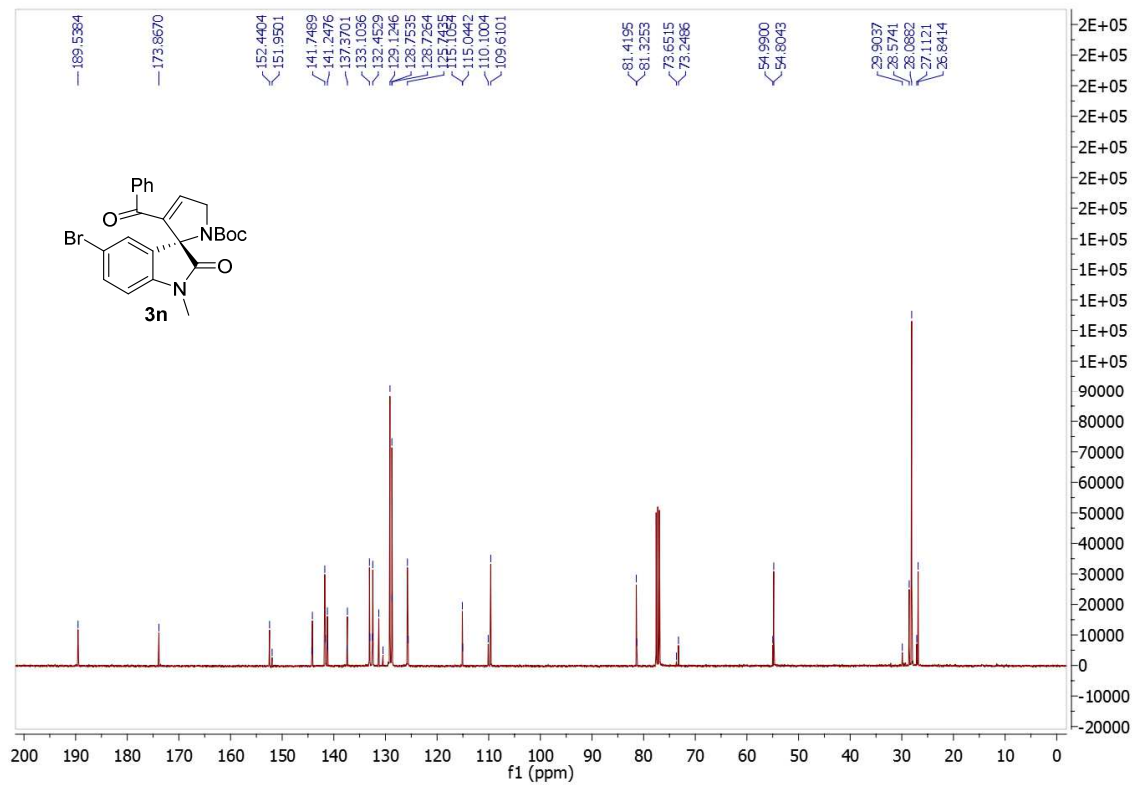

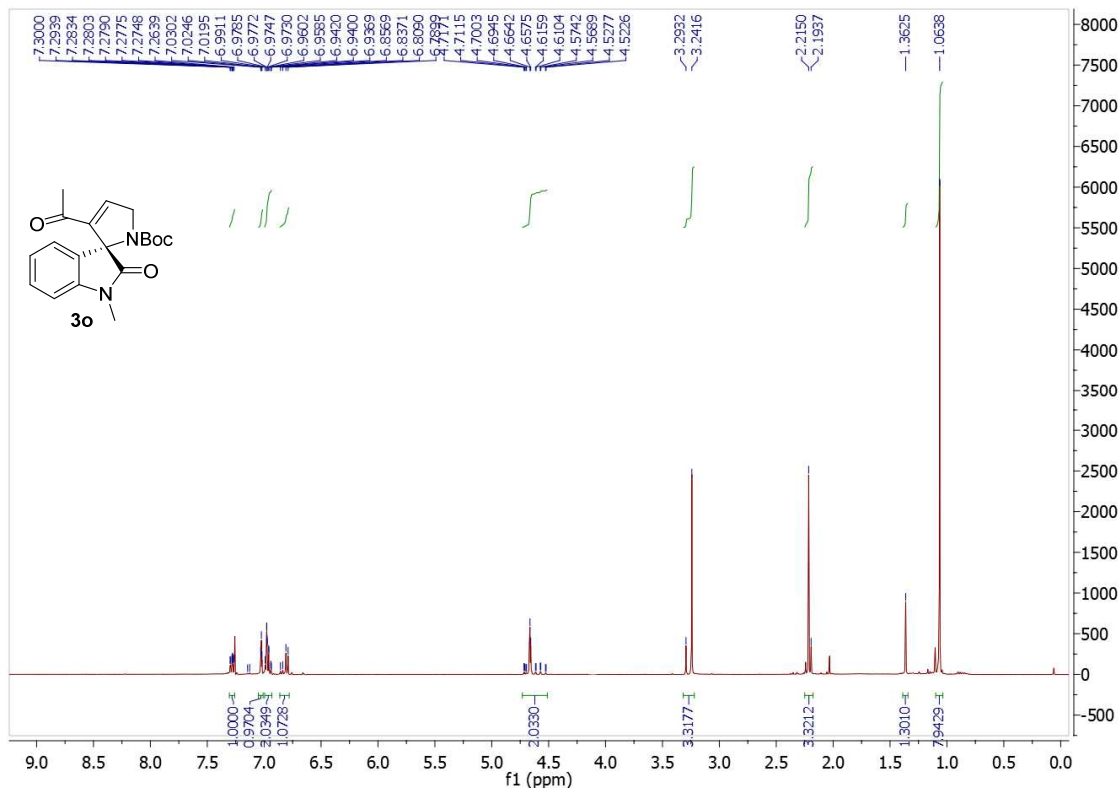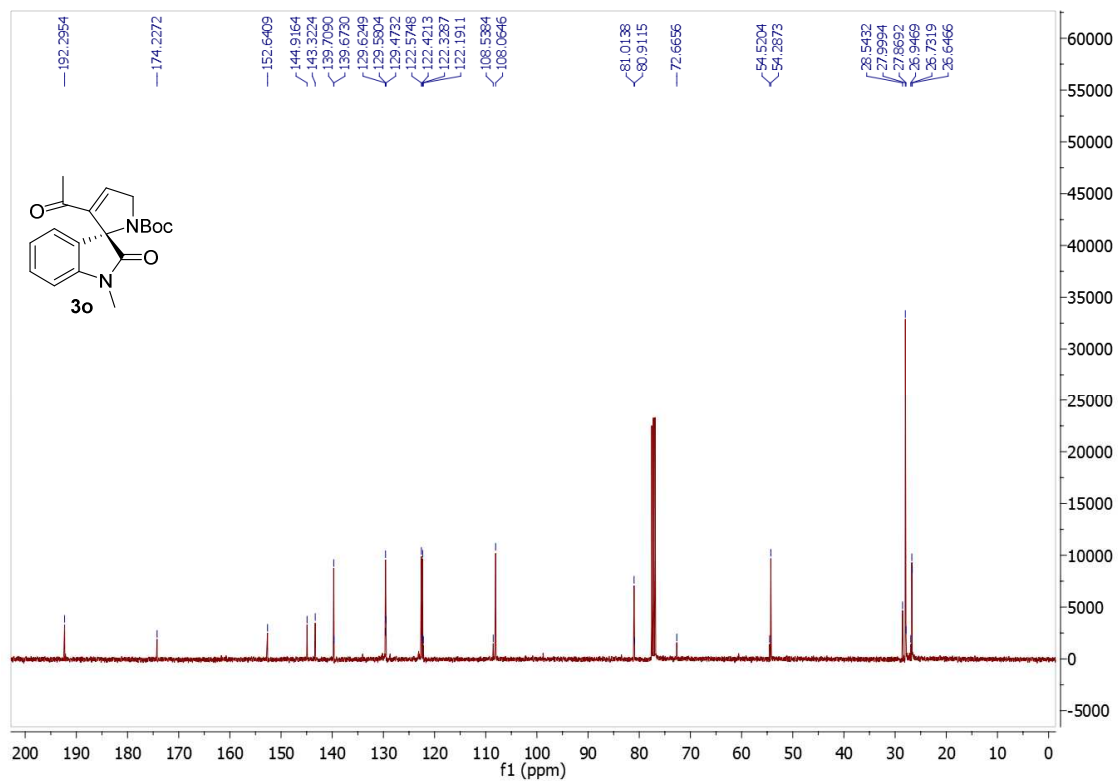

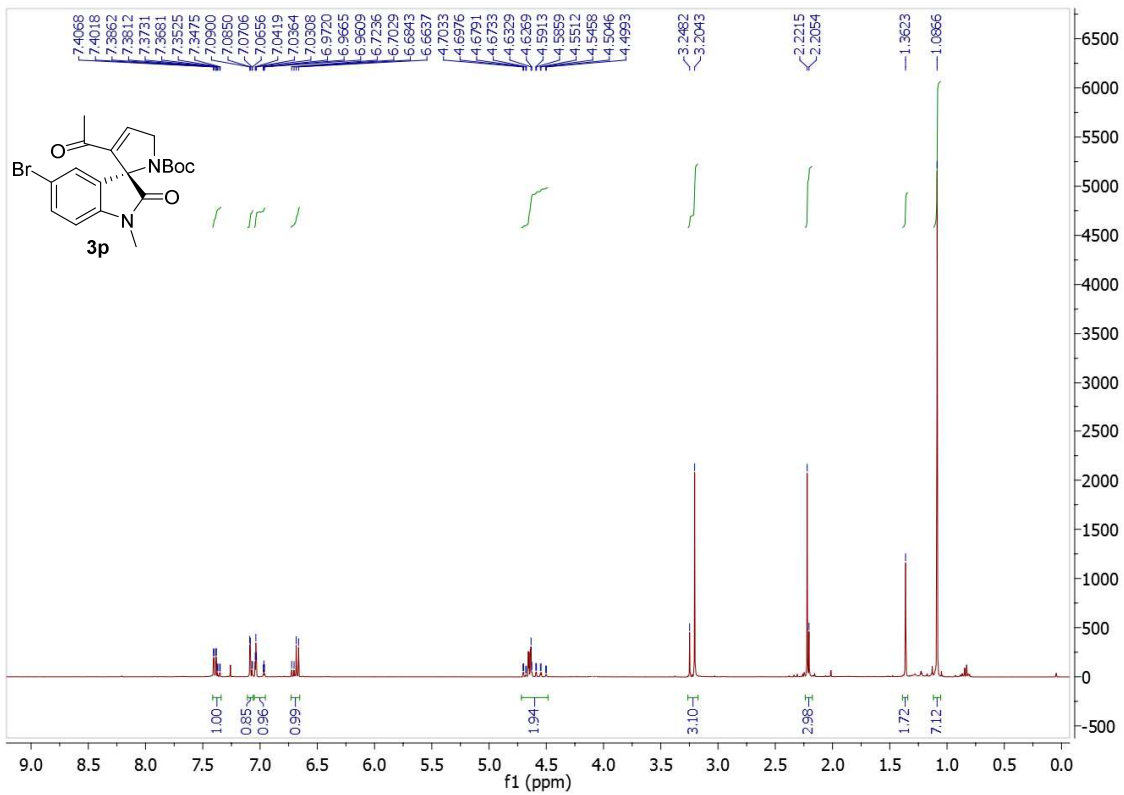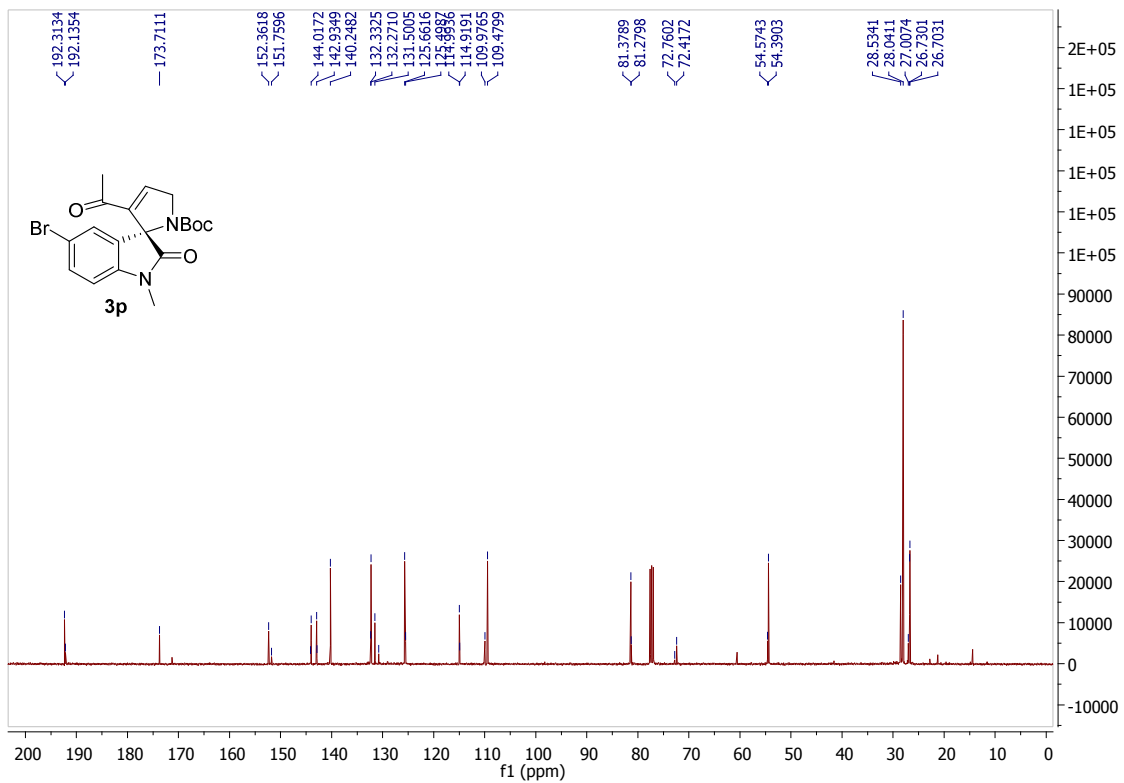

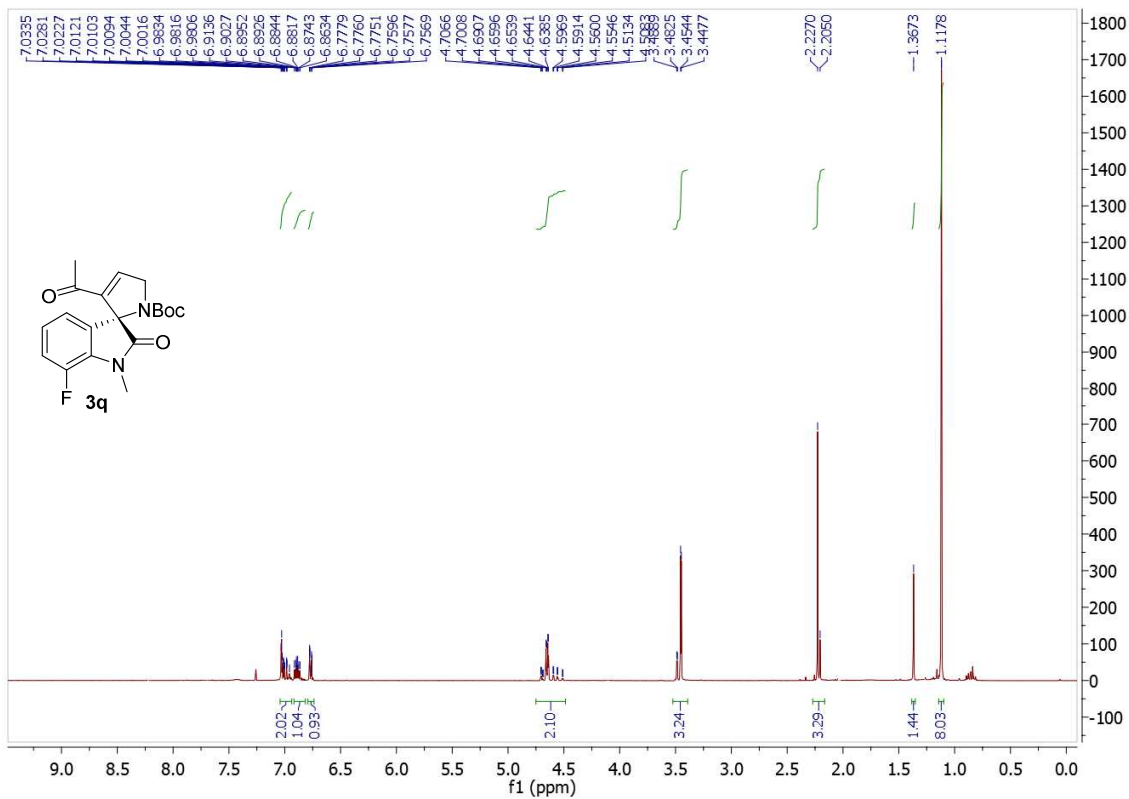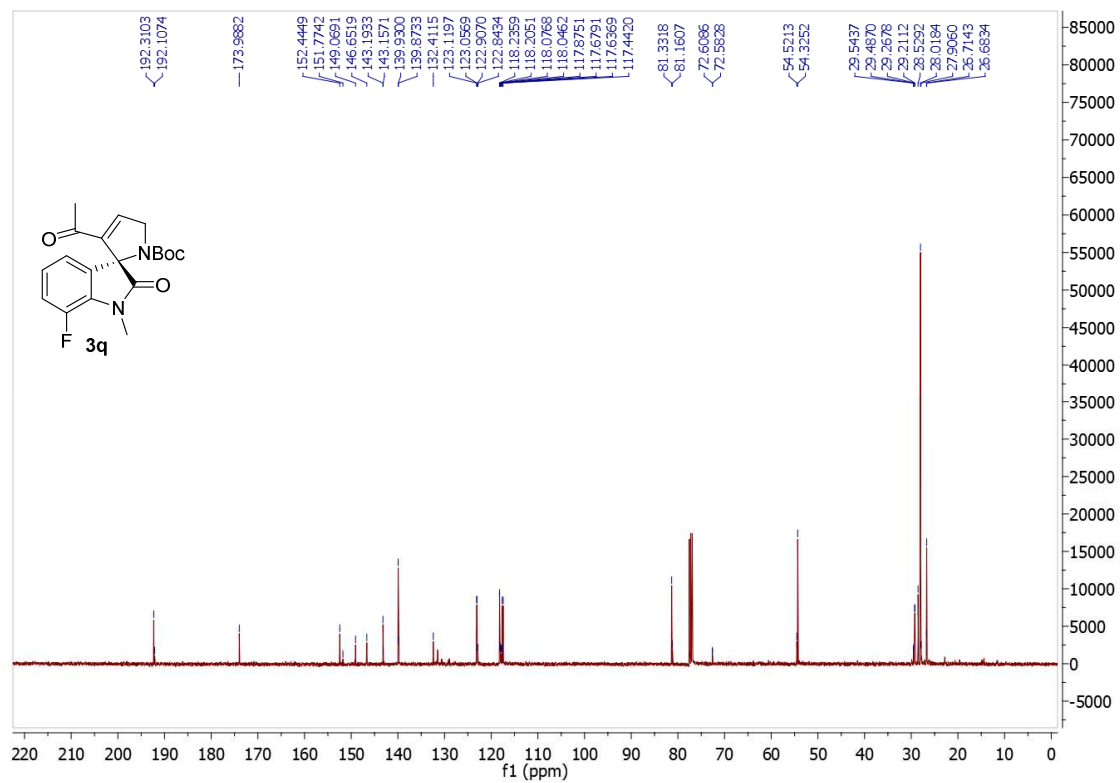



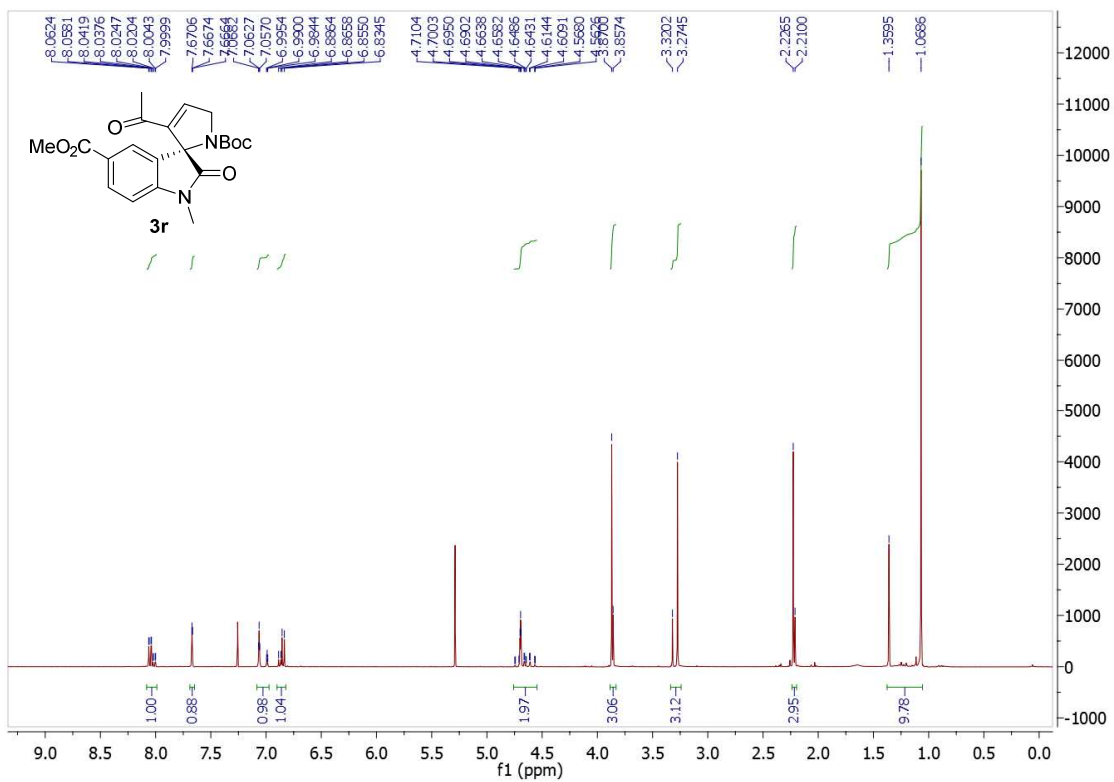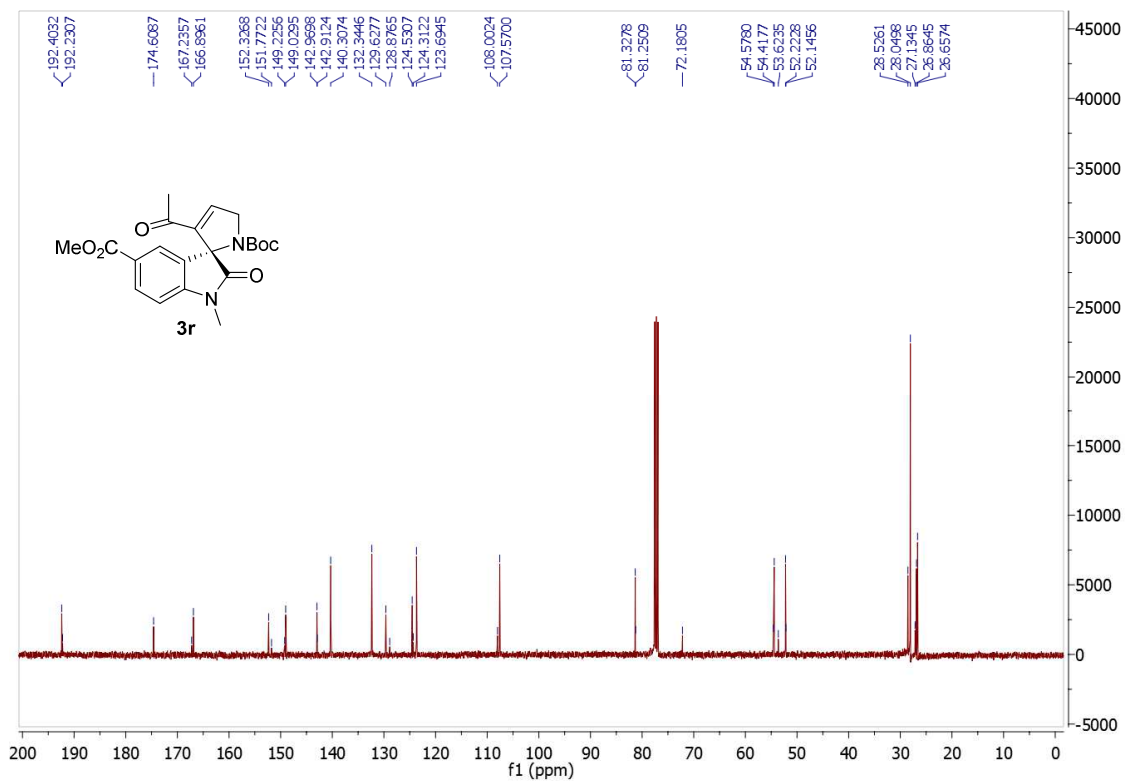

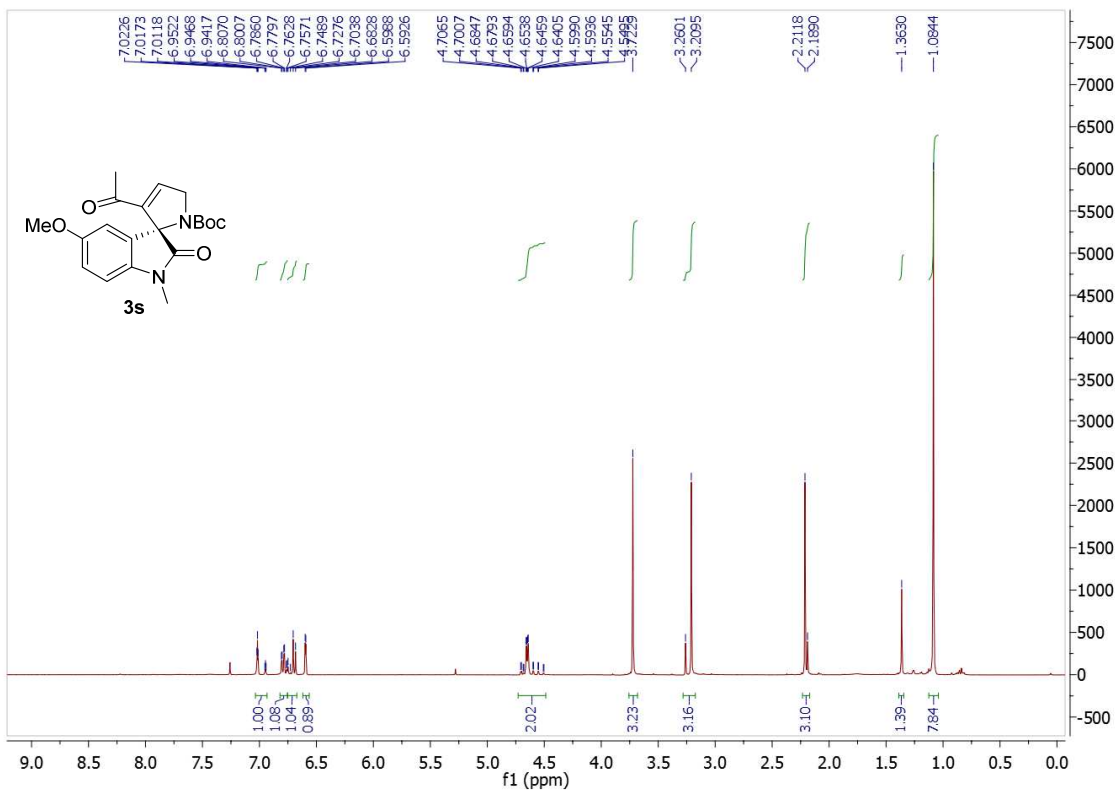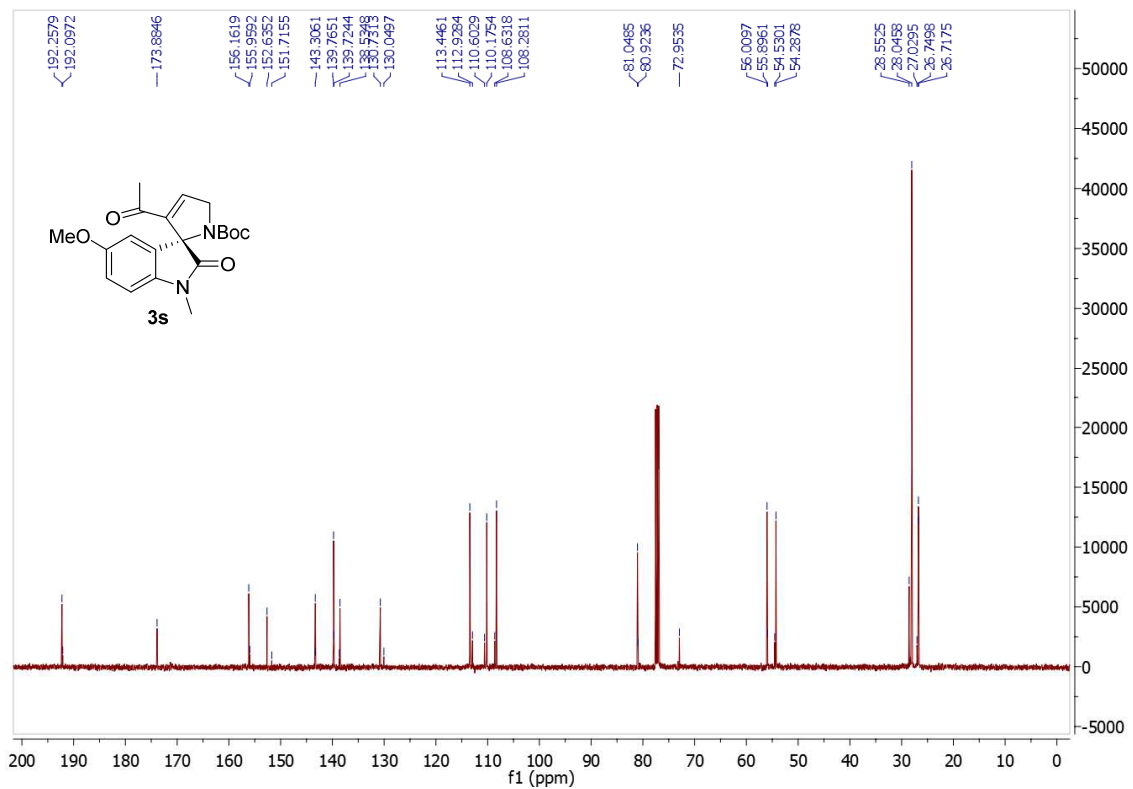

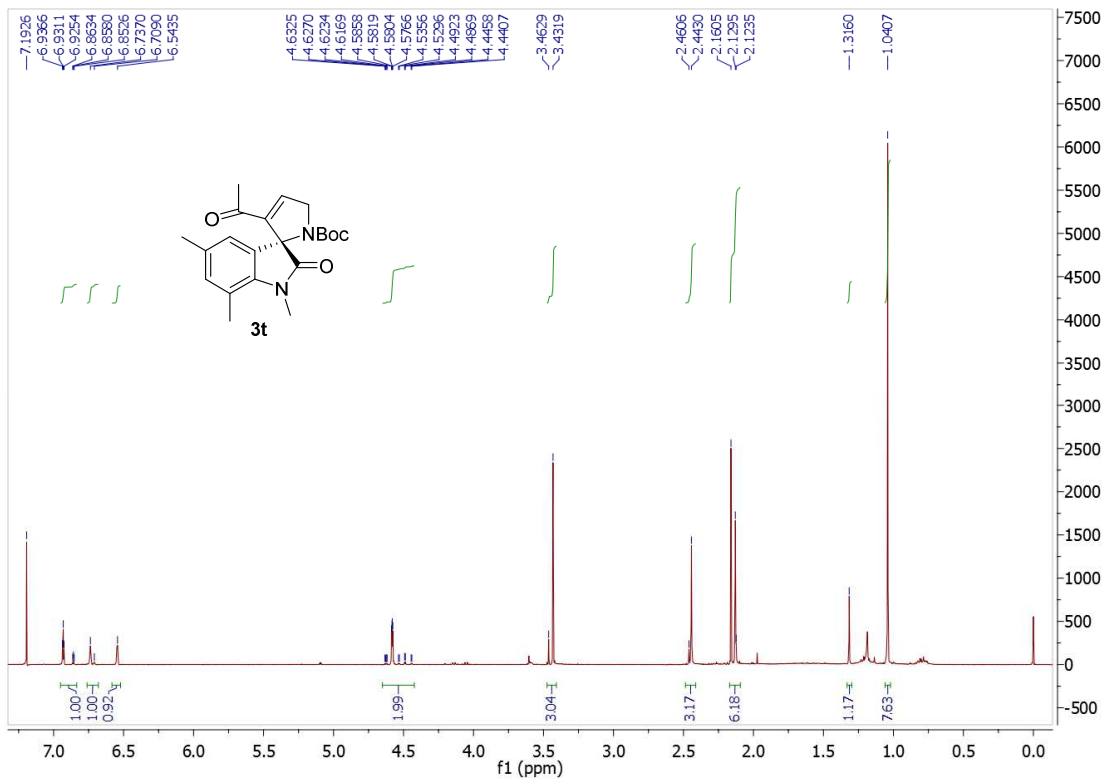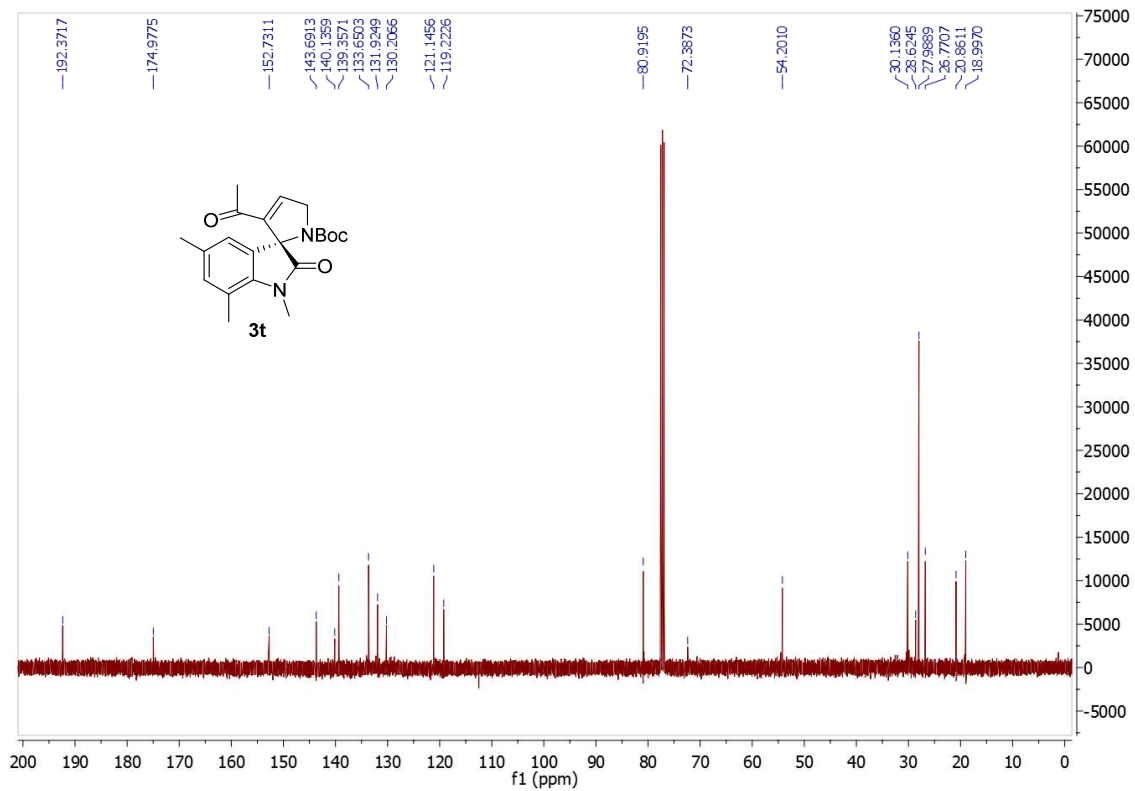

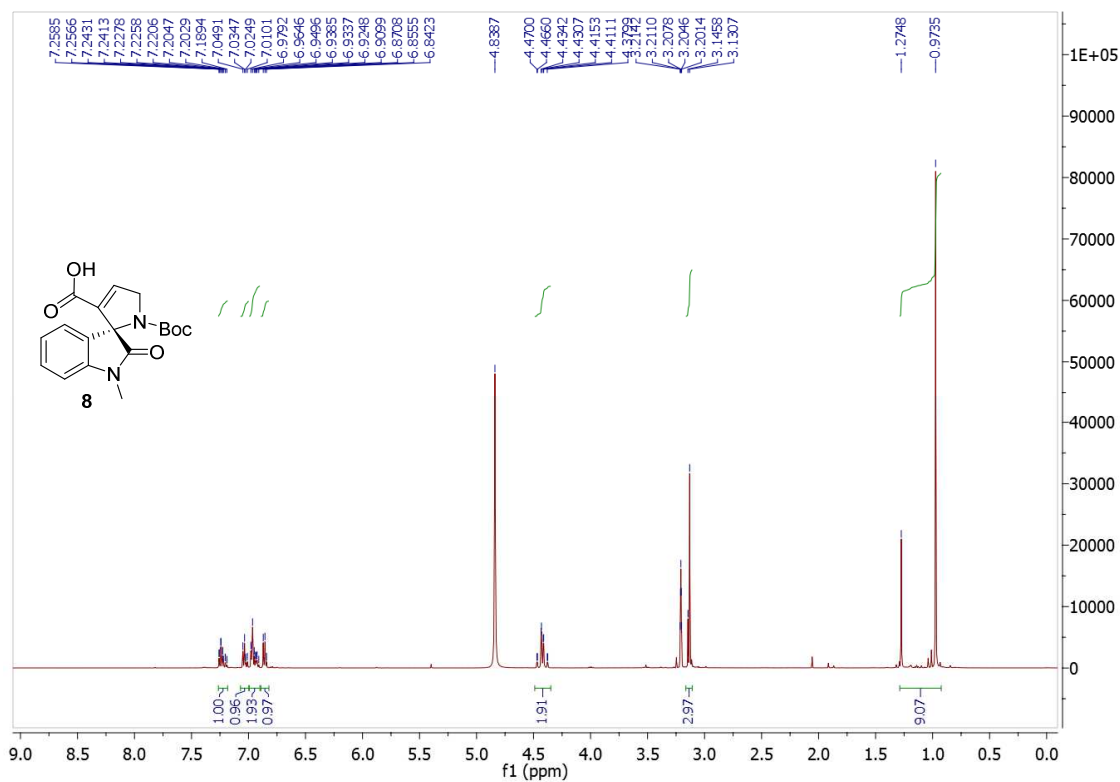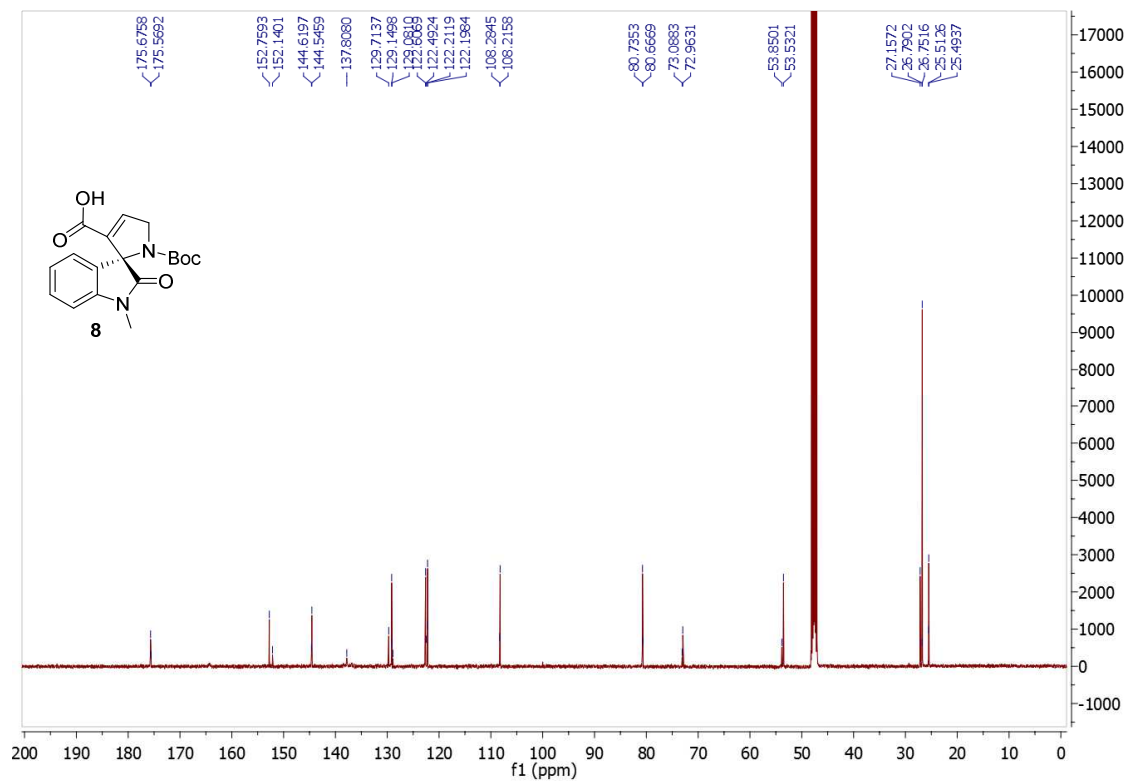

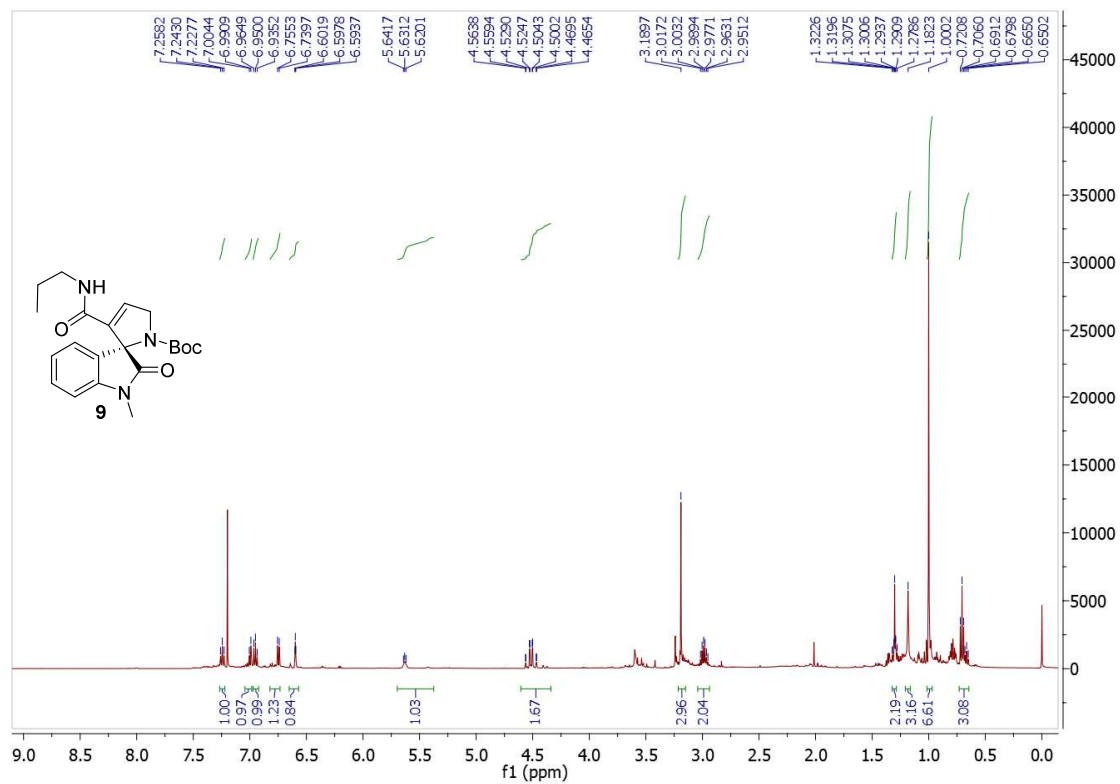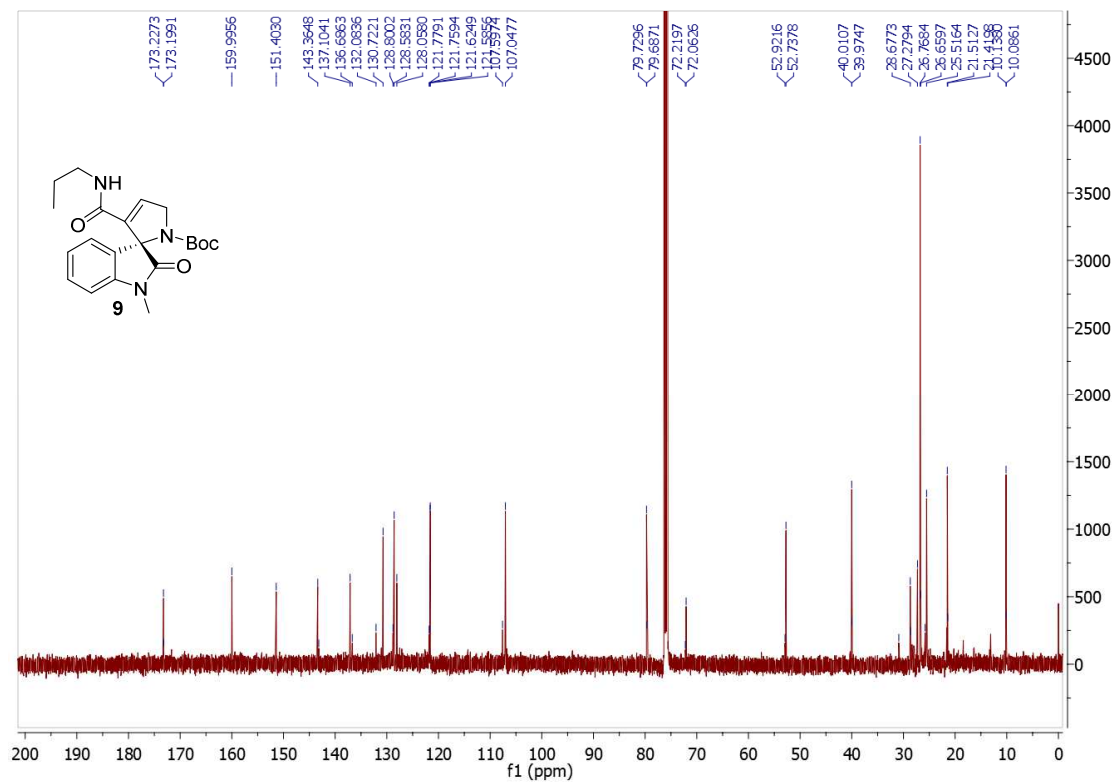

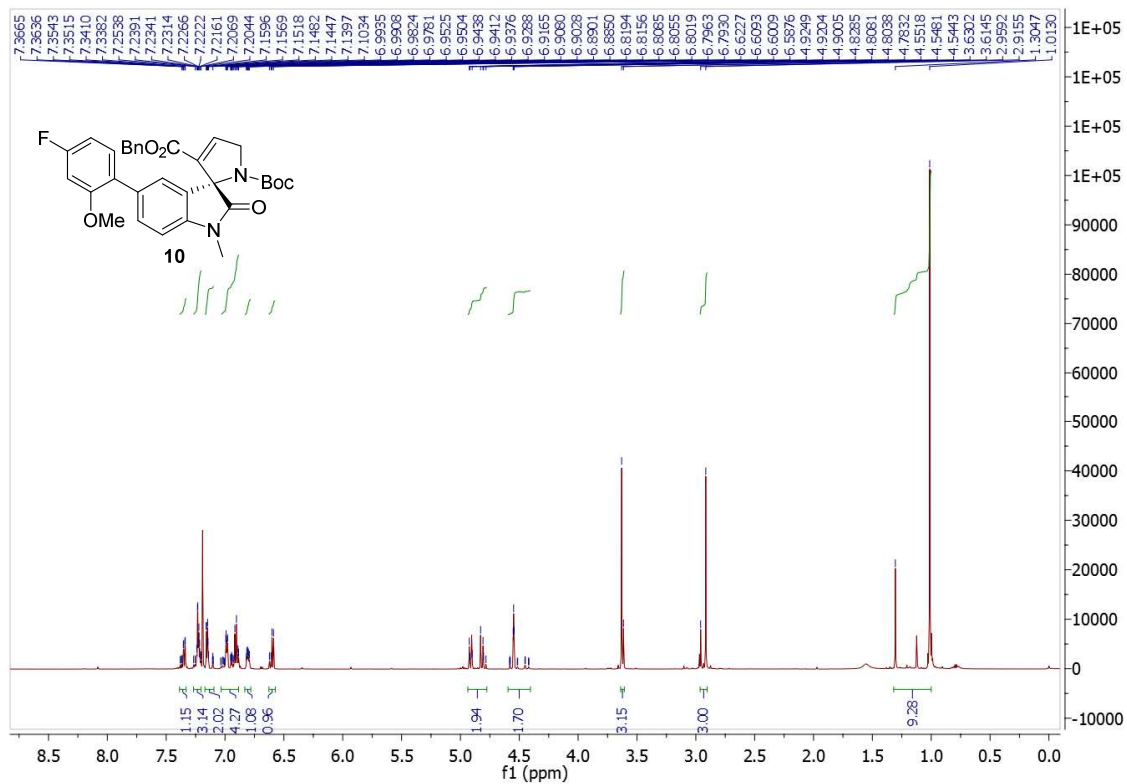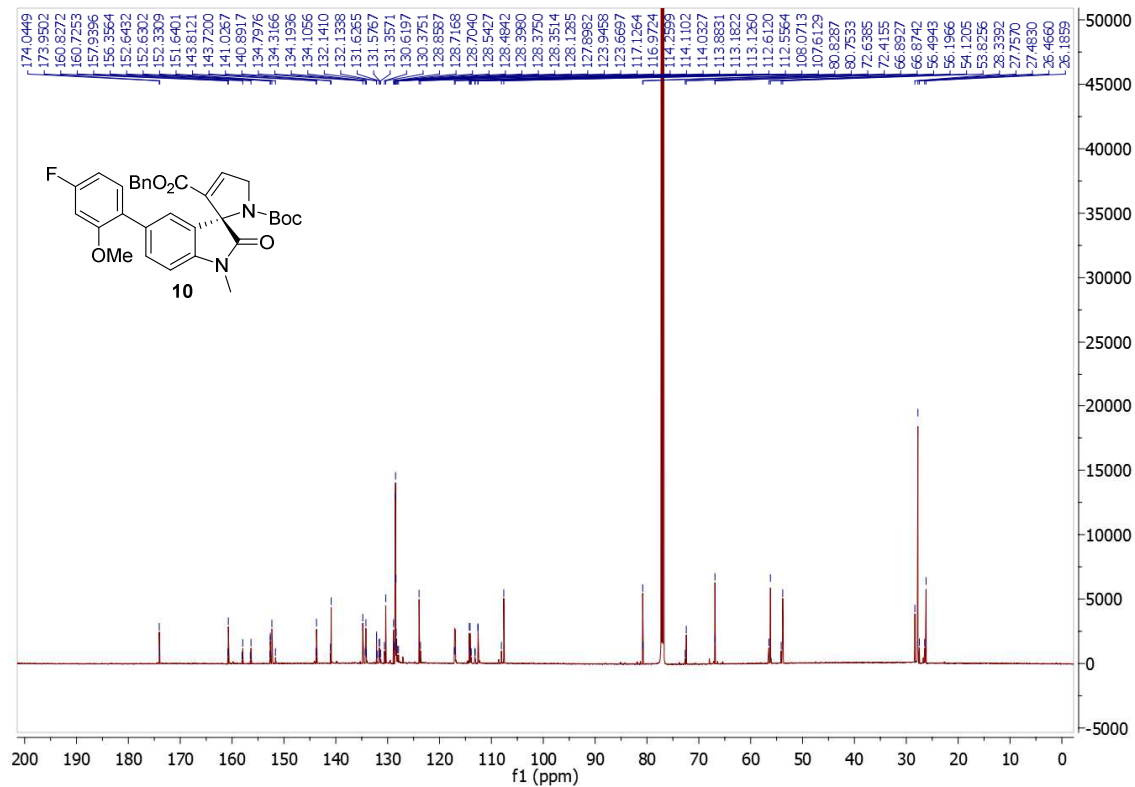

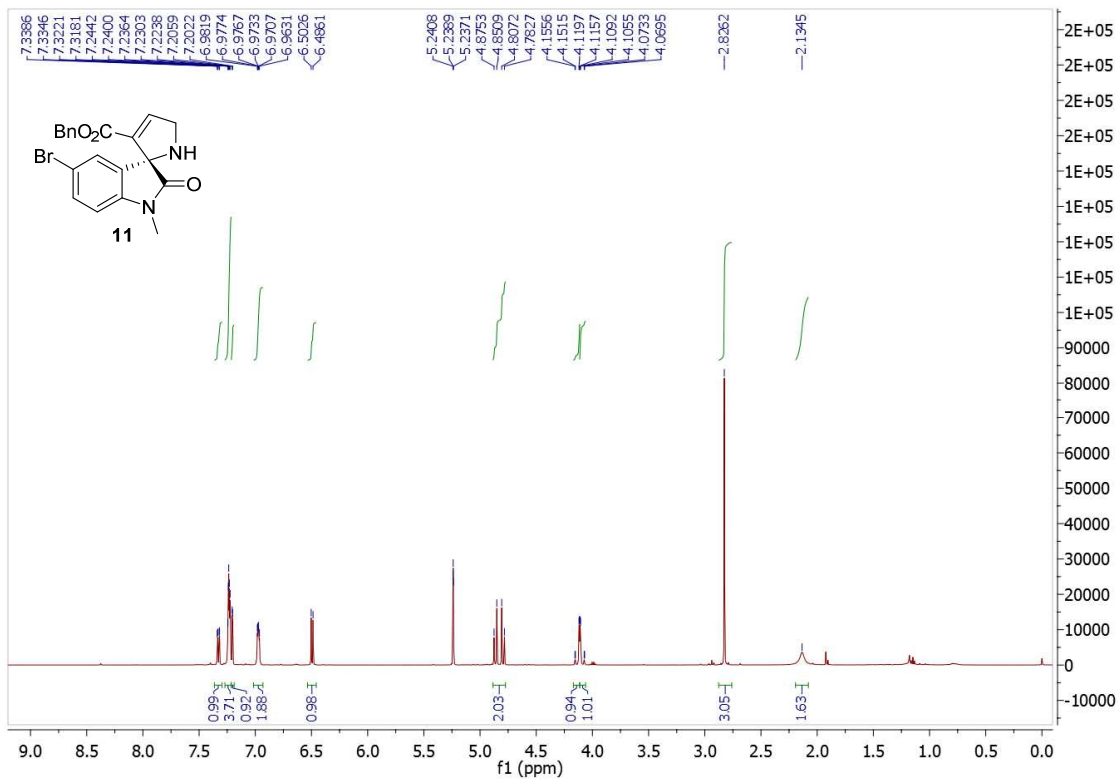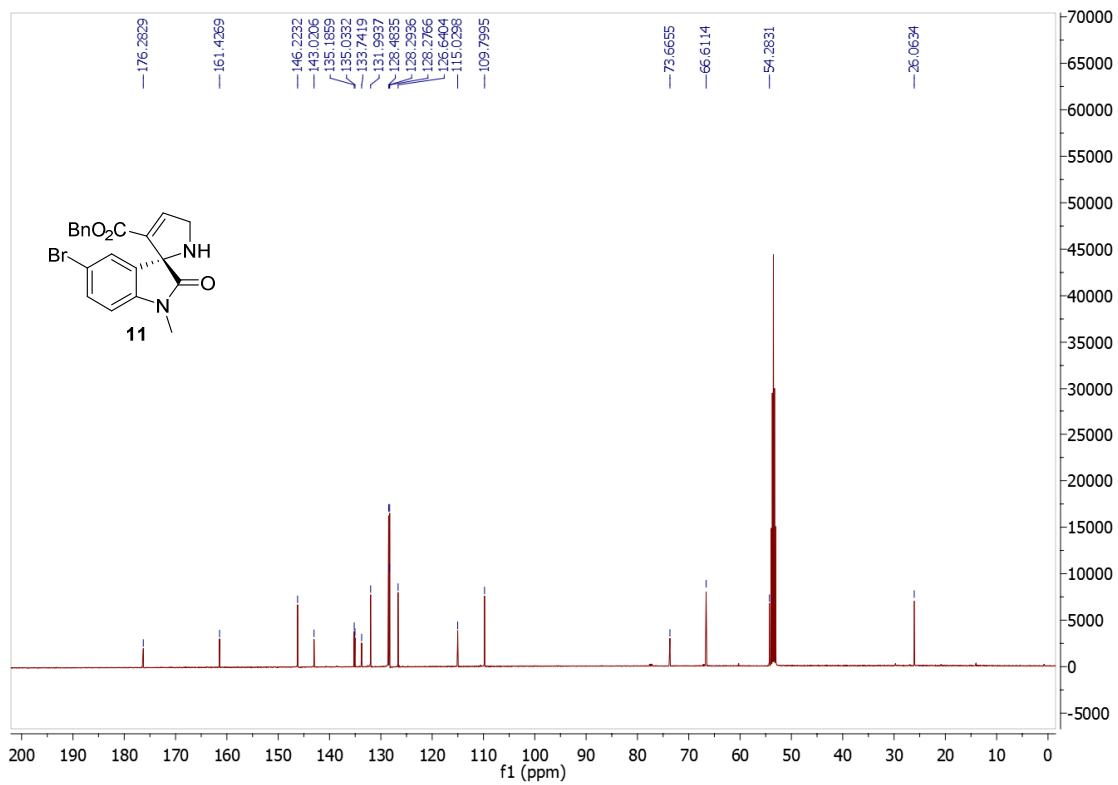

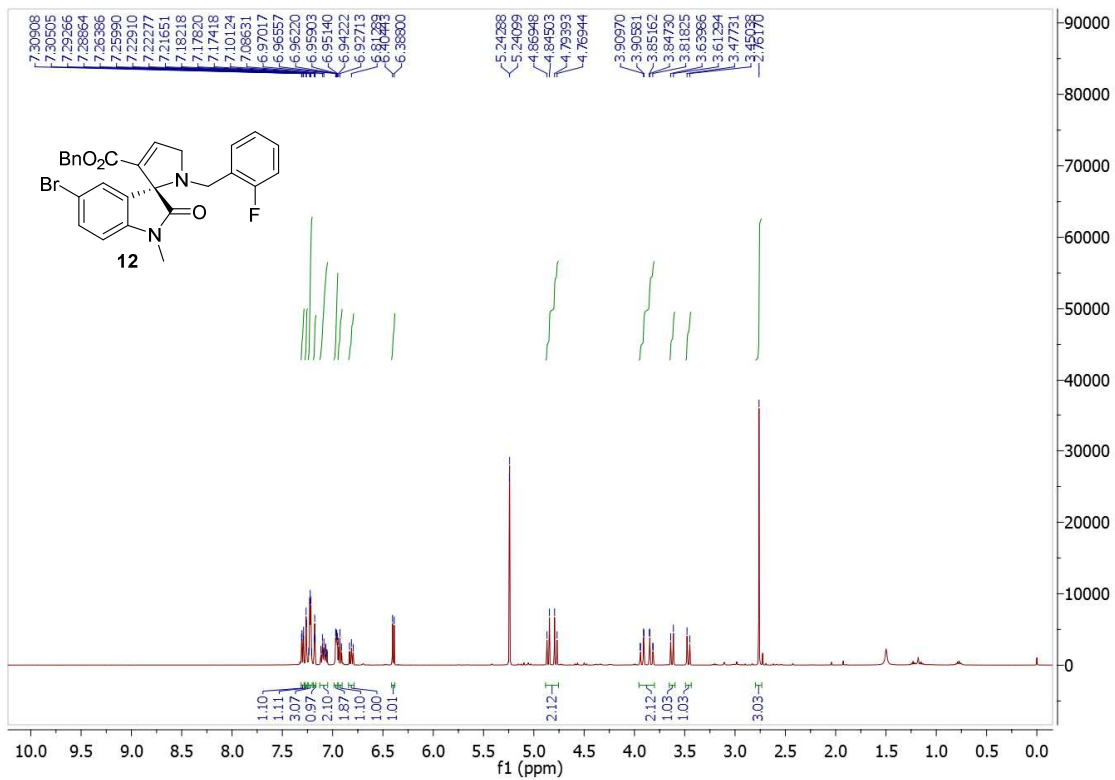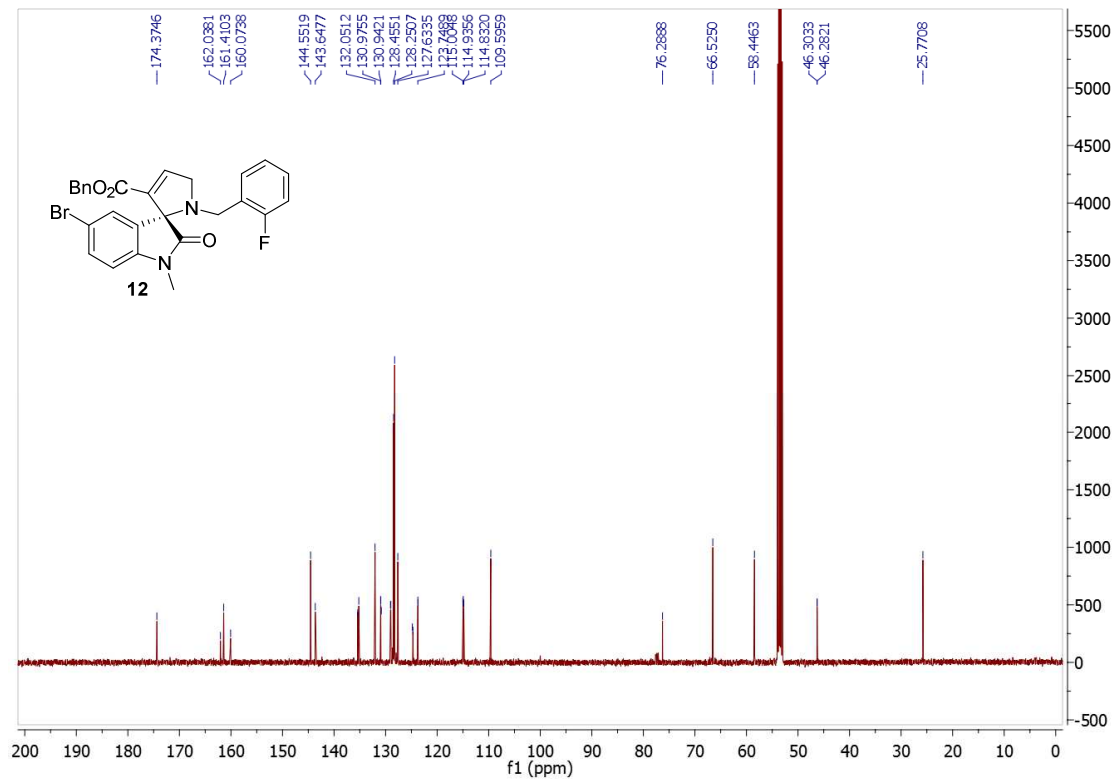

Supplement: c6ra12387b1.pdf [file c6ra12387b1.pdf]
